# Supplementary material
Source: publisher figshare collection journal article supplement (https://rs.figshare.com/ndownloader/files/30918512)
Supplement: Supplementary file 1 [file 30918512]

recID	location	date	session	playback	time	sealID	sex	call_quality	interval_start_time	condition	condition_counter	duration	pitch	pitch_strength	pitch_iqr	center_of_gravity	intensityRMS	octaveSlope	ratio14
J5_190627-T001	J5	27/06/19	1	4	2pm	191	M	c	35.63561233346833	high	1	0.5322516569641706	346.160438303467	0.8960923266835407	42.1898896367274	358.2205576487881	9.729783088887895e-05	-2.0546102795376204	66.7962201972204
J5_190627-T001	J5	27/06/19	1	4	2pm	191	M	d	37.12591697296801	high	1	0.25973880859852017
J5_190627-T001	J5	27/06/19	1	4	2pm	191	M	d	99.21571223252263	high	1	0.4300593388270499
J5_190627-T001	J5	27/06/19	1	4	2pm	191	M	c	101.1303297376618	high	1	0.4258013255713422	344.3301878888176	0.6163488300339753	87.33212131207621	361.6852966434912	0.000262743500833969	-2.05085416409564	355.806566636605
J5_190627-T001	J5	27/06/19	1	4	2pm	191	M	c	106.49988895768429	high	1	0.4343173520827577	348.90497702593836	0.5785452631026102	51.00425301906075	357.6868631457762	0.00031902624305612387	-2.02291934837166	142.777502085951
J5_190627-T001	J5	27/06/19	1	4	2pm	189	M	d	126.50175706305927	high	1	0.42154331231562026
J5_190627-T001	J5	27/06/19	1	4	2pm	191	M	d	146.96526593877218	high	1	0.5492837099870371
J5_190627-T001	J5	27/06/19	1	4	2pm	189	M	d	155.45144373931208	high	1	0.4087692725484828
J5_190627-T001	J5	27/06/19	1	4	2pm	191	M	c	158.6600825411083	high	1	0.5194776171970261	346.20194742271036	0.8000774967928896	74.52250557576757	365.8080041811263	0.00017145730139725402	-1.9893694591696798	25.6681101007832
J5_190627-T001	J5	27/06/19	1	4	2pm	191	M	c	160.30367565781359	high	1	0.459865431617061	344.12917109584197	0.6488255406793806	34.103393226332344	360.12082620563456	0.00013670632382336493	-1.88543810574032	25.553448408547002
J5_190627-T001	J5	27/06/19	1	4	2pm	191	M	c	161.78546427080184	high	1	0.6344439751012771	354.15941810810517	0.4990963926646856	41.98778333336446	374.0937195311932	-1.0374868683379196e-06	-1.9801113539052	18.8338591726355
J5_190627-T001	J5	27/06/19	1	4	2pm	191	M	c	163.78892057278807	high	1	0.6088958955670307	338.17640014836593	0.7581207138315158	72.58413604378187	374.56229577870204	0.00010295114864166603	-2.1513183769120703	11.5483626363442
J5_190627-T001	J5	27/06/19	1	4	2pm	191	M	c	169.88986672016256	high	1	0.4002532460370389	341.0034441993847	0.6853254243347118	85.51345649413507	355.9833856433866	1.1059554607454041e-05	-1.7352669580580602	26.613116997143504
J5_190627-T001	J5	27/06/19	1	4	2pm	191	M	c	179.2154923697256	high	1	0.4087692725484828	368.7975846974103	0.8915554819711867	83.52761816783658	377.9786359967297	0.00017163991754062	-2.13504386391086	168.327174195812
J5_190627-T001	J5	27/06/19	1	4	2pm	191	M	d	211.36327649790528	high	1	0.4385753653384654
J5_190627-T001	J5	27/06/19	1	4	2pm	191	M	c	215.1740733694503	high	1	0.6344439751013056	339.90829328151375	0.925345069179736	117.1102161338962	371.9906213985782	2.658118480817703e-05	-2.20955328819212	51.7014958823555
J5_190627-T001	J5	27/06/19	1	4	2pm	191	M	c	219.44279272347612	high	1	0.4385753653384654	339.6342157572272	0.6331463660645688	45.86807365883789	358.4953885514672	0.00016569249619398797	-2.01754120569774	57.747595492364
J5_190627-T001	J5	27/06/19	1	4	2pm	191	M	c	220.69137629742343	high	1	0.4630666949704505	318.28177368436667	0.8605021272898957	118.03715878019949	375.58712701493874	0.000145481346893212	-1.91819341394307	30.1068929370822
J5_190627-T001	J5	27/06/19	1	4	2pm	191	M	c	222.98532784908318	high	1	0.327463357967531	335.9108958266115	0.5332710250939648	65.04094627780853	345.371405770974	0.00013907076216168504	-2.7327617985015498	490.00547235515404
J5_190627-T001	J5	27/06/19	1	4	2pm	191	M	d	224.65234157833058	high	1	0.5210938652874688
J5_190627-T001	J5	27/06/19	1	4	2pm	191	M	c	328.7521639550497	low	2	0.4441840197686133	319.31736579926513	0.9327694046953072	12.2392495852813	389.7322754868747	9.546392642539509e-05	-2.0776133577775298	93.6707685480527
J5_190627-T001	J5	27/06/19	1	4	2pm	191	M	c	486.63819476315484	low	2	0.5526470124496541	351.27186589550126	0.9646292527213016	24.706131576832377	431.2676366181073	0.0002301403402363983	-2.11230043186903	32.7482393297703
J5_190627-T001	J5	27/06/19	1	4	2pm	191	M	c	488.88646468535086	low	2	0.4976876410458431	374.4884787320325	0.9850304839785418	9.816106084947421	943.5786727798917	0.00071126993911196	-1.7454890597429902	0.6033505044338421
J5_190627-T001	J5	27/06/19	1	4	2pm	191	M	c	492.5581047519992	low	2	0.564860206094977	334.28774011758395	0.9176177496768296	27.05287615021081	682.8398446002765	0.00017456312660189946	-1.9530843751990898	1.3255144361796203
J5_190627-T001	J5	27/06/19	1	4	2pm	191	M	c	542.4985615658464	low	2	0.5373805203930715	368.7372179430089	0.9974371839461698	20.42956858868996	435.2377397355757	0.0003299377202896609	-1.9724668205588702	20.8324770258826
J5_190627-T001	J5	27/06/19	1	4	2pm	191	M	c	545.3726363302145	low	2	0.3083831395437073	342.1309696423705	0.9678196926059536	7.3907600612166675	421.5952759366485	0.00017368206923005572	-2.0698038567999397	12.9601171317768
J5_190627-T001	J5	27/06/19	1	4	2pm	191	M	c	546.6578690850695	low	2	0.5801266981516164	352.9276012692293	0.9712354294867924	112.23428844800615	465.08505485238123	0.0003777170572047504	-2.17337022824402	13.6202686333519
J5_190627-T001	J5	27/06/19	1	4	2pm	191	M	c	548.6743548703923	low	2	0.516007431513799	326.4816188056123	0.97712041796501	18.12869885414148	460.22847999625697	0.000163041611616059	-2.14293388176266	10.5586317888978
J5_190627-T001	J5	27/06/19	1	4	2pm	191	M	d	578.5951316866402	low	2	0.6887450333184688
J5_190627-T001	J5	27/06/19	1	4	2pm	191	M	c	582.9248637832333	low	2	0.33715919578958164	382.3061626451792	0.9724539285454964	20.73009678194512	401.83149195459134	4.469950900810109e-05	-2.02012040556563	387.098265919471
J5_190627-T001	J5	27/06/19	1	4	2pm	191	M	d	583.9646236739327	low	2	0.5556883041716674
J5_190627-T001	J5	27/06/19	1	4	2pm	191	M	d	594.8625691899831	low	2	0.4949522781763562
J5_190627-T001	J5	27/06/19	1	4	2pm	191	M	d	605.3538628428237	low	2	0.4864915554725258
J5_190627-T001	J5	27/06/19	1	4	2pm	191	M	d	607.769193234917	low	2	0.5118737235842445
J5_190627-T001	J5	27/06/19	1	4	2pm	191	M	c	609.3055116012491	low	2	1.0914332287993602	343.91951408682837	0.9482083976300058	10.701745723460363	508.2521366680603	0.0001423060823670838	-2.01006766320396	6.48449294227066
J5_190627-T001	J5	27/06/19	1	4	2pm	191	M	c	635.2797485204088	silence	3	0.6495398163375512	388.7331801252807	0.9916720735554272	48.503449378152645	461.1518854465382	0.0002391229980036653	-2.12768784438135	18.9266468192725
J5_190627-T001	J5	27/06/19	1	4	2pm	191	M	d	637.1186223049052	silence	3	0.8544917001333943
J5_190627-T001	J5	27/06/19	1	4	2pm	191	M	c	643.9421679098584	silence	3	1.0531373721200907	372.3660376008808	0.9966525385981256	10.996144091576982	414.2339215785965	0.0003143157127540598	-2.03130129282502	26.1595486682475
J5_190627-T001	J5	27/06/19	1	4	2pm	191	M	c	645.9904352328805	silence	3	0.6621522399557307	385.88653928297424	0.9745414596931842	25.363476181290427	439.95327361180506	0.00037574807527311356	-2.05538346825204	14.5132648266869
J5_190627-T001	J5	27/06/19	1	4	2pm	191	M	c	647.4427030754043	silence	3	0.6400804986238882	352.39861997838693	0.9918374969430372	17.95051783002299	433.94439649632415	0.00019099654772598279	-2.0223405347284498	9.08326862743914
J5_190627-T001	J5	27/06/19	1	4	2pm	191	M	d	649.3088536578321	silence	3	0.7567454170922474
J5_190627-T001	J5	27/06/19	1	4	2pm	191	M	c	651.1416086241345	silence	3	0.7441329934740679	363.83884961401117	0.9312673958564353	37.271788168519386	534.3764360801965	0.00026332035500827765	-1.96938245109226	4.75968228744902
J5_190627-T001	J5	27/06/19	1	4	2pm	191	M	d	653.9822563246835	silence	3	0.7441329934740679
J5_190627-T001	J5	27/06/19	1	4	2pm	191	M	c	656.0301858943648	silence	3	0.602243227769236	341.2075103613116	0.8127746061676105	33.39600556155631	642.947167384026	0.0005309832741604878	-1.87964466141707	1.8605089355031699
J5_190627-T001	J5	27/06/19	1	4	2pm	191	M	c	659.4065863098849	silence	3	0.592783910055573	359.13616550236367	0.9404734650593306	46.20727243203071	669.6759841167542	0.00020721724395979414	-1.9363661923007802	1.8809790074838
J5_190627-T001	J5	27/06/19	1	4	2pm	191	M	c	664.2415607797378	silence	3	0.6968364049057527	342.5353425224404	0.952590979104766	113.35246297330737	378.3146285889458	0.00014131789151705228	-2.02173728621879	35.2797283089198
J5_190627-T001	J5	27/06/19	1	4	2pm	191	M	c	668.9829182985877	silence	3	0.6495398163375512	503.87563969693184	0.8809769210738368	19.95970813193668	536.3049644951059	9.912490072525725e-05	-2.21356435946225	16.4485934413747
J5_190627-T001	J5	27/06/19	1	4	2pm	191	M	c	671.2309949133453	silence	3	0.955391089078944	425.7712684435345	0.944772973983561	177.35908566355099	446.21915964949176	4.159991644226431e-05	-2.1874903753529598	36.6322824443189
J5_190627-T001	J5	27/06/19	1	4	2pm	191	M	c	673.1865336163103	silence	3	0.577018380532877	335.5655289892074	0.9859942536690612	10.076455269465896	721.4845705145447	8.99973169380294e-05	-2.03177089155326	1.67405492533288
J5_190627-T001	J5	27/06/19	1	4	2pm	189	M	d	999.0384598022307	high	4	0.8417576089860859
J5_190627-T001	J5	27/06/19	1	4	2pm	191	M	c	1028.3384923925387	high	4	0.6901512021534018	321.8043569506883	0.6439266432947349	113.35521031693831	381.80129045814783	4.699046628790608e-05	-2.2247336449439503	16.3476840357409
J5_190627-T001	J5	27/06/19	1	4	2pm	191	M	c	1036.408306469919	high	4	0.4790855432422632	338.829116341337	0.7149817256136954	102.76207132089293	382.5754989788424	0.00011641317631254095	-2.2036912469885297	27.531623966009303
J5_190627-T001	J5	27/06/19	1	4	2pm	191	M	c	1040.165728008565	high	4	0.4790855432424905	356.6167018110521	0.6573875123671523	52.76063598029327	365.6478764987935	5.022784083640898e-05	-2.09036610061444	27.6848430559379
J5_190627-T001	J5	27/06/19	1	4	2pm	191	M	c	1041.5372819609402	high	4	0.3517760981851552	357.73355318950775	0.7266525426435613	46.642902565147104	353.24409405944846	-4.3154948125008084e-05	-2.14623726461093	437.63605471361296
J5_190627-T001	J5	27/06/19	1	4	2pm	191	M	c	1156.2939911110966	high	4	0.4991870345672851	360.4906559188519	0.6213130072084979	61.539009307926044	377.62142797381796	3.979530063635004e-05	-1.8154387919038502	49.40866546109199
J5_190627-T001	J5	27/06/19	1	4	2pm	191	M	c	1183.408098839679	high	4	0.4690347975799796	354.590789931362	0.7908641597519828	56.59774184422986	380.1324530850178	-3.023128580769102e-05	-2.0740314987168897	11.774585095064099
J5_190627-T001	J5	27/06/19	1	4	2pm	189	M	c	1198.182939556089	high	4	0.31157311553533873	353.3027197895326	0.5148208015165996	160.2446422290703	668.7708996849276	0.000532023689964331	-1.86403929774879	1.67723543702851
J5_190627-T001	J5	27/06/19	1	4	2pm	189	M	d	1199.281821081848	high	4	0.4053800750511982
J5_190627-T001	J5	27/06/19	1	4	2pm	189	M	d	1210.2364632320073	high	4	0.34172535252264424
J5_190627-T001	J5	27/06/19	1	4	2pm	191	M	c	1218.7559721919465	high	4	0.4789166412890609	344.5190629248273	0.8030927320814613	57.579034745991976	361.6815688870245	0.00010164391228992503	-2.03189993656473	153.51204006362101
J5_190627-T001	J5	27/06/19	1	4	2pm	191	M	c	1238.8821728132225	low	5	0.5592042862076596	368.65490100342834	0.9753801666220449	13.926043987932415	413.02522946601084	0.0003294728588675066	-1.9489792768869498	23.1133281750414
J5_190627-T001	J5	27/06/19	1	4	2pm	191	M	c	1240.4044511478985	low	5	0.7663169848028701	458.2173950348711	0.6273753781340018	87.36836916677673	466.077026141674	0.00027046432242505393	-2.2076075843466403	71.6279435871408
J5_190627-T001	J5	27/06/19	1	4	2pm	191	M	c	1242.466523732903	low	5	0.3883363098661903	324.59931938499716	0.9891287365139092	8.09699331936946	424.7799047824141	0.00012710009348955778	-2.04271936177814	7.50030544636868
J5_190627-T001	J5	27/06/19	1	4	2pm	191	M	c	1244.8690310366092	low	5	0.5850933735318904	320.3998631199769	0.8379830859742758	14.098680855713212	549.5231865979752	8.890467709849858e-05	-1.9969868006566798	3.1318368760754196
J5_190627-T001	J5	27/06/19	1	4	2pm	191	M	c	1246.7927978108555	low	5	0.4908849923128855	332.63445982427737	0.9202484542302716	30.07566060904389	449.25593292203837	7.027913249708632e-05	-2.07001861830383	14.2184347904404
J5_190627-T001	J5	27/06/19	1	4	2pm	191	M	d	1284.320486585605	low	5	0.5759140940326688
J5_190627-T001	J5	27/06/19	1	4	2pm	191	M	c	1286.2298234018574	low	5	0.4773342040632542	347.16853741622026	0.9345681972485416	10.027526870137137	503.1123380520632	4.354603255672381e-05	-1.9941584235179197	4.73564349006152
J5_190627-T001	J5	27/06/19	1	4	2pm	191	M	d	1288.0196704366413	low	5	0.5551604329864404
J5_190627-T001	J5	27/06/19	1	4	2pm	191	M	c	1289.4516730488306	low	5	1.0428714675724675	344.05045667414305	0.5160235902020647	27.680978321557802	577.6965592323512	5.8893723704717234e-05	-1.99668869384439	3.33796705644222
J5_190627-T001	J5	27/06/19	1	4	2pm	191	M	c	1291.5841117213295	low	5	0.591479339817397	341.4182748466906	0.92847174345024	18.96550135482937	476.36800076674723	3.8170266809530614e-05	-1.9765841701088998	6.055033385603861
J5_190627-T001	J5	27/06/19	1	4	2pm	191	M	c	1294.4486413116788	low	5	0.7293789740294869	366.49364456883364	0.9801675128340988	27.28165096040607	556.2687625282645	0.00011105830621463871	-1.96425060452415	4.40810789597903
J5_190627-T001	J5	27/06/19	1	4	2pm	191	M	d	1329.126509361241	low	5	0.6784920688646707
J5_190627-T001	J5	27/06/19	1	4	2pm	191	M	d	1334.1224770396168	low	5	0.6445674654214599
J5_190627-T001	J5	27/06/19	1	4	2pm	191	M	c	1336.779624912785	low	5	0.4184034424665697	363.5765387656696	0.9527993407835772	18.344252328337234	375.49040935753175	2.4950721877822573e-05	-2.0037845309491296	718.410096390937
J5_190627-T001	J5	27/06/19	1	4	2pm	191	M	d	1338.5673542868428	low	5	0.4525602872527088
J5_190627-T001	J5	27/06/19	1	4	2pm	191	M	d	1422.3465767260543	low	5	0.5212237610776356
J5_190627-T001	J5	27/06/19	1	4	2pm	191	M	c	1474.6910949047287	low	5	0.906786543244607	349.23601292762663	0.9562651733947648	16.596254466007167	525.6690837955423	0.00018458515132129723	-2.02815126065407	11.343703588180599
J5_190627-T001	J5	27/06/19	1	4	2pm	191	M	c	1476.522518120022	low	5	0.7925457188989641	349.6756767364482	0.9631073456099258	24.073418139382053	534.9719139780261	0.000132226252490128	-2.03094134727293	8.378323544976269
J5_190627-T001	J5	27/06/19	1	4	2pm	191	M	c	1478.314429204421	low	5	0.696155023357278	339.12713442062505	0.9480242903709336	12.823116537257135	552.625028624021	7.155019745393802e-05	-1.9818625111808899	3.3196165124054
J5_190627-T001	J5	27/06/19	1	4	2pm	191	M	c	1479.9624319139807	low	5	0.6711648430314199	350.0739932605327	0.96909808362344	11.338753778006605	714.0141722069388	9.244807880665531e-05	-1.9272475755893201	1.8630219538243797
J5_190627-T001	J5	27/06/19	1	4	2pm	191	M	c	1481.6974644337322	low	5	0.6533147142274629	347.82133996877764	0.8339028997638409	17.675991845597594	569.9485430476466	7.414934270060487e-05	-2.0417744520413796	3.3856666213397797
J5_190627-T001	J5	27/06/19	1	4	2pm	191	M	c	1484.7266853108936	low	5	0.4498232458615803	323.0677622617908	0.8856648040637735	38.40805485399681	458.6708987673906	2.1150743529703192e-05	-2.18032906396594	18.5980503939314
J5_190627-T001	J5	27/06/19	1	4	2pm	191	M	c	1486.8186185135055	low	5	0.510513683795125	358.02628728090133	0.9399399268228512	54.98775589412424	439.23707552219315	4.668127633777953e-05	-2.1951784334841498	44.45028451383799
J5_190627-T001	J5	27/06/19	1	4	2pm	191	M	c	1625.322247834738	silence	6	0.6643630977753219	327.45916865500845	0.9746404235057876	54.82086718498221	520.810253601555	4.234297179343069e-05	-1.84043981981208	4.66925750702853
J5_190627-T001	J5	27/06/19	1	4	2pm	191	M	d	1627.109947004947	silence	6	1.0090326748170355
J5_190627-T001	J5	27/06/19	1	4	2pm	191	M	c	1629.2878591149474	silence	6	1.278774082936479	367.62555598536085	0.9691729823465683	42.947540541000315	538.9270487492355	8.548356036866776e-05	-2.01407582155697	5.2374752368058495
J5_190627-T001	J5	27/06/19	1	4	2pm	191	M	c	1634.1841239325681	silence	6	0.5707263002664149	339.5566700906488	0.9733199861313676	40.81601901169404	458.0050707911058	6.858195697644472e-05	-2.03096188112981	6.903562581099339
J5_190627-T001	J5	27/06/19	1	4	2pm	191	M	d	1636.1629866867402	silence	6	1.0292585415058966
J5_190627-T001	J5	27/06/19	1	4	2pm	191	M	c	1641.208156942274	silence	6	0.4829222540715818	348.52404382360766	0.9974072122112936	3.697249286396072	381.0381413878473	0.00012940791188531422	-2.03888710438432	45.847809624516
J5_190627-T001	J5	27/06/19	1	4	2pm	191	M	c	1644.274025909668	silence	6	0.658530346461248	339.3095182652795	0.9822894738000711	18.873162345012584	402.67375363291967	0.0001220812167354478	-2.0949267131543503	18.138256214288102
J5_190627-T001	J5	27/06/19	1	4	2pm	191	M	d	1673.6400246409833	silence	6	0.5302820340061771
J5_190627-T001	J5	27/06/19	1	4	2pm	191	M	c	1676.5654035088892	silence	6	0.7744885029208035	353.35414823899384	0.9897621149956122	81.96704523914786	471.2503731398511	0.00031525314280180303	-2.0946259315716396	11.631481235443498
J5_190627-T001	J5	27/06/19	1	4	2pm	191	M	c	1680.7122781673365	silence	6	0.6716267769954811	336.6721484828374	0.992286311799615	15.969923341934702	432.0067805730204	4.402269722360843e-05	-2.0741441414597	13.390464677718802
J5_190627-T001	J5	27/06/19	1	4	2pm	191	M	d	1684.2858066252386	silence	6	0.4669063155583899
J5_190627-T001	J5	27/06/19	1	4	2pm	191	M	c	1685.6046975511615	silence	6	0.8835304125182121	325.85781099659334	0.9977763693881668	13.056830016197011	502.44569910034113	5.666172507927109e-05	-1.98278829530529	4.82733906419788
J5_190627-T001	J5	27/06/19	1	4	2pm	191	M	d	1688.5616785737845	silence	6	0.3663418783610268
J5_190627-T001	J5	27/06/19	1	4	2pm	191	M	d	1691.8061622730222	silence	6	1.102617222126355
J5_190627-T001	J5	27/06/19	1	4	2pm	191	M	c	1694.3529238915396	silence	6	0.5351464693708294	320.5227321769771	0.9568115948551048	14.215434858954213	427.81956863131853	3.6939103949236256e-05	-2.03363043395729	8.73070643247915
J5_190627-T001	J5	27/06/19	1	4	2pm	191	M	d	1699.3920205972645	silence	6	0.5064137730287257
J5_190627-T001	J5	27/06/19	1	4	2pm	191	M	d	1700.6490760622294	silence	6	0.5171885341569578
J5_190627-T001	J5	27/06/19	1	4	2pm	191	M	c	1704.2860975931933	silence	6	0.4561315544301578	452.4035216963594	0.9444529338920116	70.66997250903228	443.4638933043795	1.2526035713500869e-05	-2.1503174173704602	658.1086817471511
J5_190627-T001	J5	27/06/19	1	4	2pm	191	M	c	1706.1357899413974	silence	6	0.5279632952851898	495.43626125949373	0.95025469599837	33.6793669180247	497.6527326046872	7.069201686642954e-05	-2.24192629164176	52.6255007305132
J5_190627-T001	J5	27/06/19	1	4	2pm	191	M	c	1708.8129285587052	silence	6	1.1421246795966908	346.03214379116235	0.9358533310981959	137.89978572317594	453.28180344939386	0.00014539119712662967	-2.17352789693135	21.8181594696182
J5_190627-T001	J5	27/06/19	1	4	2pm	191	M	d	1711.4409654723045	silence	6	0.2190868096083705
J5_190627-T001	J5	27/06/19	1	4	2pm	191	M	d	1712.5328079333026	silence	6	0.5531044045844737
J5_190627-T001	J5	27/06/19	1	4	2pm	191	M	d	1714.4151509700946	silence	6	0.5638791657127058
J5_190627-T001	J5	27/06/19	1	4	2pm	191	M	d	1752.6931746141738	silence	6	0.7125099627701275
J5_190627-T001	J5	27/06/19	1	4	2pm	191	M	d	1806.5486297453351	silence	6	0.5471058642699518
J5_190627-T001	J5	27/06/19	1	4	2pm	191	M	d	1807.99909645526	silence	6	0.6107228252315053
J5_190627-T001	J5	27/06/19	1	4	2pm	191	M	c	1809.0424146150306	silence	6	0.5916377369430847	335.4605515424432	0.9223075309593376	18.390480004614915	520.397894928395	6.877998456155731e-05	-2.0199809108642097	3.96647615018652
J5_190627-T001	J5	27/06/19	1	4	2pm	191	M	d	1810.5310863171067	silence	6	0.7634035315395522
J5_190627-T001	J5	27/06/19	1	4	2pm	191	M	d	1813.0219742678607	silence	6	0.3880634618658405
J5_190627-T001	J5	27/06/19	1	4	2pm	191	M	c	1831.2598896361105	low	7	0.5464638688276864	334.45188050353823	0.6394007536016475	19.94557005984137	632.2229778809112	3.805948759754252e-05	-1.95557200839818	2.2326401225894
J5_190627-T001	J5	27/06/19	1	4	2pm	191	M	d	1832.867533151516	low	7	0.7088025076845952
J5_190627-T001	J5	27/06/19	1	4	2pm	191	M	d	1835.334323139248	low	7	0.8116931942840893
J5_190627-T001	J5	27/06/19	1	4	2pm	191	M	d	1838.0081033162185	low	7	0.6402087166184174
J5_190627-T001	J5	27/06/19	1	4	2pm	191	M	c	1855.914773724847	low	7	0.5601826270410584	348.28136208406545	0.978963770634424	14.370257602349115	426.5796152032492	0.00010135290670134802	-2.01641286874261	14.336632973244901
J5_190627-T001	J5	27/06/19	1	4	2pm	191	M	d	1857.2340609730213	low	7	0.6333493375118451
J5_190627-T001	J5	27/06/19	1	4	2pm	191	M	c	1858.9562803967426	low	7	0.530458650912351	334.3592551698028	0.9811631174669192	17.011211655091756	445.75708913301355	2.9647890405008055e-05	-2.02101611366211	7.44236595892436
J5_190627-T001	J5	27/06/19	1	4	2pm	191	M	c	1861.6373134699493	low	7	0.6996566688758321	349.1959084921666	0.9551879828080532	19.109767639529988	448.6902476353763	4.4996121484185586e-05	-1.9841893829831103	11.112726477273199
J5_190627-T001	J5	27/06/19	1	4	2pm	191	M	c	1863.2714480304965	low	7	0.6424951763206082	349.40608883953354	0.9326916999967974	25.450448089489043	416.7586655254297	4.962654115773122e-05	-2.05454399236127	19.736273918949603
J5_190627-T001	J5	27/06/19	1	4	2pm	191	M	c	1865.2519062281906	low	7	0.6813649912583061	327.48084470590163	0.929584140186274	14.826855664887885	535.7090642665272	2.3391248975214008e-05	-2.00249890217071	5.81520918623575
J5_190627-T001	J5	27/06/19	1	4	2pm	191	M	c	1866.180208867287	low	7	0.28352100307392897	273.41629728143715	0.8356548649739035	239.9081340938581	483.59937588090514	3.498794927604131e-05	-2.15918253500594	125.421385416227
J5_190627-T001	J5	27/06/19	1	4	2pm	191	M	c	1869.6169730367121	low	7	0.6379222569162266	351.1389731316768	0.964144959726997	14.455919594034016	487.1279517829173	4.1856864805520077e-05	-2.01696605956846	8.72882300377832
J5_190627-T001	J5	27/06/19	1	4	2pm	191	M	c	1870.9947523443088	low	7	0.4732971583573544	354.17532086013017	0.8094843961722044	9.547961783144617	458.8565557843514	4.373803240118936e-05	-2.03551010295568	11.7136368803621
J5_190627-T001	J5	27/06/19	1	4	2pm	191	M	c	2038.9702868901004	low	7	0.2520395575488692	363.4098836564626	0.9420949719058821	31.888824339640564	398.94930201440206	3.806243409632786e-05	-2.1097076595443003	450.715099879595
J5_190627-T001	J5	27/06/19	1	4	2pm	191	M	c	2046.8029664635824	low	7	0.4722051846015347	318.6527722774158	0.905351336372496	13.185309103489034	342.3314073087603	3.460708750262397e-05	-1.96299702844799	23.8687581390735
J5_190627-T001	J5	27/06/19	1	4	2pm	191	M	c	2174.1452692965	high	8	1.1921280775127343	355.9953049765436	0.7534098990975235	90.81959972116249	381.92900957435216	0.00024596354653389396	-2.12265200753527	41.147779291900704
J5_190627-T001	J5	27/06/19	1	4	2pm	191	M	c	2176.453229254565	high	8	0.5626844525859269	338.49255759698747	0.7503174264911087	56.55466244047699	353.2591425941762	-9.205565252726504e-05	-2.0769812642805903	8.65434415287382
J5_190627-T001	J5	27/06/19	1	4	2pm	191	M	c	2179.531950380914	high	8	0.5197678417953284	344.1744477289688	0.8966150267323463	43.28887164403778	373.49148260914114	-1.3742453015264968e-05	-2.40408406932661	17.1349192379006
J5_190627-T001	J5	27/06/19	1	4	2pm	191	M	c	2181.5904800945873	high	8	0.6485176741671239	363.14661541029074	0.6221912966846598	188.56147526939426	399.14739671155996	0.000476065815624586	-2.20925943853772	226.20775444043701
J5_190627-T001	J5	27/06/19	1	4	2pm	191	M	c	2183.583718240189	high	8	0.6914342849572677	356.3579701165465	0.4414308205191584	63.74205766192472	379.5498215912574	0.00012921060513097402	-2.0395465781686597	22.545931937660004
J5_190627-T001	J5	27/06/19	1	4	2pm	191	M	d	2185.3090216594805	high	8	0.8344896542589595
J5_190627-T001	J5	27/06/19	1	4	2pm	191	M	c	2187.235500632741	high	8	0.5626844525859269	349.94999795388037	0.6040555321992691	61.62674368011881	364.4664730324801	3.522927352764293e-05	-2.9452081268857504	24.8057808434596
J5_190627-T001	J5	27/06/19	1	4	2pm	191	M	c	2188.738903994804	high	8	0.6485176741666692	349.90080071193506	0.7716297468746243	69.28698997928541	375.66714267473935	0.000112100817010353	-1.86515068602131	25.442073325025397
J5_190627-T001	J5	27/06/19	1	4	2pm	191	M	c	2194.666106548249	high	8	0.5054623048654321	360.3451905585203	0.759604219543869	42.76671940791948	584.9100631770423	0.000305237852285002	-1.8243033445247798	1.06136813883974
J5_190627-T001	J5	27/06/19	1	4	2pm	191	M	c	2368.720104527069	high	8	0.8731334578078531	344.27669511732836	0.5272550196396386	51.516886052416105	363.4999424378813	1.589287197017509e-05	-1.9006087986781202	6.39819911956984
J5_190627-T001	J5	27/06/19	1	4	2pm	191	M	c	2375.849419895885	high	8	0.6080750866881317	342.2546794594067	0.9672262298592136	43.073319942525025	355.26797376672164	9.995437127910899e-05	-1.9498559813411298	42.7095252359749
J5_190627-T001	J5	27/06/19	1	4	2pm	191	M	d	2377.679071563649	high	8	0.9770779170708009
J5_190627-T001	J5	27/06/19	1	4	2pm	191	M	d	2381.6231102608367	high	8	0.6756389852084794
J5_190627-T001	J5	27/06/19	1	4	2pm	191	M	c	2388.5493746411084	high	8	0.3638056074200904	336.7197210811198	0.8288977461830014	105.0796511402496	356.8973869081704	-0.00021719075653329502		-177.08958278907699
J5_190627-T001	J5	27/06/19	1	4	2pm	191	M	d	2402.7892111047777	high	8	0.4105806140883033
J5_190627-T001	J5	27/06/19	1	4	2pm	191	M	d	2415.2784829194447	high	8	0.2837089624581495
J5_190627-T001	J5	27/06/19	1	4	2pm	191	M	c	2443.26613940326	silence	9	0.6640711461695901	290.4426628894824	0.9914461011865208	17.285790261076894	354.7214930531105	0.00020931766909878212	-2.02665629103017	52.8573507615883
J5_190627-T001	J5	27/06/19	1	4	2pm	191	M	d	2469.347961629414	silence	9	0.5030842016435599
J5_190627-T001	J5	27/06/19	1	4	2pm	191	M	c	2470.780745435695	silence	9	0.4910101808040963	462.3082856110661	0.7918642090126708	13.608382261176873	476.5166819613955	1.7005243840465845e-05	-2.13704361098602	32.1184316452728
J5_190627-T001	J5	27/06/19	1	4	2pm	191	M	c	2472.0759582490405	silence	9	0.6077257155852749	468.8058502134967	0.8360971785682351	48.25404592173504	511.6933513633944	2.434832141223572e-05	-2.23289241536625	15.8770992512159
J5_190627-T001	J5	27/06/19	1	4	2pm	191	M	d	2474.3667513181103	silence	9	0.30957433535513695
J5_190627-T001	J5	27/06/19	1	4	2pm	191	M	d	2475.534412159999	silence	9	0.5360921417127429
J5_190627-T001	J5	27/06/19	1	4	2pm	189	M	c	2477.3007581702577	silence	9	0.4454850191691549	349.31321326288094	0.93357212438537	7.956521747976352	714.6342043157354	1.2453948085843143e-05	-1.80214439646192	1.43900150251473
J5_190627-T001	J5	27/06/19	1	4	2pm	189	M	c	2479.8867939797587	silence	9	1.0835101737425248	379.42513671945864	0.9998167096546472	73.1253377101367	540.0883446621467	0.00018737746186200377	-1.87559477454733	5.24497412449721
J5_190627-T001	J5	27/06/19	1	4	2pm	189	M	d	2651.6576199637443	silence	9	0.5763647427083924
J5_190627-T001	J5	27/06/19	1	4	2pm	191	M	c	2680.3019132885747	silence	9	0.4229278628213251	363.39426688127435	0.986128698836508	20.485675427599066	400.08111306694013	5.5578057717714514e-05	-1.9716261723009199	23.4841841426618
J5_190627-T001	J5	27/06/19	1	4	2pm	189	M	d	2685.5509274601873	silence	9	0.6362739319665707
J5_190627-T001	J5	27/06/19	1	4	2pm	189	M	d	2686.879918979376	silence	9	0.47720544897492795
J5_190627-T001	J5	27/06/19	1	4	2pm	189	M	c	2688.717775023197	silence	9	0.47720544897492795	488.3759550395336	0.5187959936762649	19.607150267209533	818.3338244325312	0.0001454310212638407	-2.0155304757989	1.71451434798542
J5_190627-T001	J5	27/06/19	1	4	2pm	189	M	c	2690.200381238243	silence	9	1.3084665536407556	468.25366307616025	0.8082033207099008	39.370579832087344	804.6075679710161	0.00016841985268164196	-1.96345918526006	1.8300300957308302
J5_190628-T001	J5	28/06/19	2	6	2pm	191	M	c	62.12129997633737	silence	1	0.6394459188195611	385.039283312108	0.9269039857548499	18.067542010395695	425.83171002709366	1.5036921777596348e-05	-1.7553058620272801	143.161667128304
J5_190628-T001	J5	28/06/19	2	6	2pm	191	M	c	63.66995942873464	silence	1	1.0163148499917654	346.4314089588871	0.8904265666419974	21.65723366160944	441.684139079654	0.00017849808305309402	-2.0362697414985202	14.633002891120201
J5_190628-T001	J5	28/06/19	2	6	2pm	191	M	c	66.91088137089639	silence	1	0.7627139548428232	376.8261023800239	0.9959176636925452	21.60418170568857	415.91463111300146	0.0002906746784479982	-1.94507063508821	34.2140017587755
J5_190628-T001	J5	28/06/19	2	6	2pm	191	M	c	68.63343716101973	silence	1	0.6557269295028759	362.39312794518776	0.9621590728252384	43.873016039699735	404.3496414223553	0.00027141680164282045	-2.03219958221297	35.047637044777495
J5_190628-T001	J5	28/06/19	2	6	2pm	191	M	c	138.50469342929009	silence	1	1.149590537908182	306.1800389444205	0.9959929761438052	20.24434770527648	377.7418024856881	0.0001188059265324968	-2.0859869150219197	13.875291745793099
J5_190628-T001	J5	28/06/19	2	6	2pm	191	M	c	141.70523344180947	silence	1	0.5626396572768613	370.9242991589718	0.7611963165433105	27.225046903653435	481.95277644993513	0.0002877955862433029	-2.0414674972223796	13.114457124605698
J5_190628-T001	J5	28/06/19	2	6	2pm	191	M	c	147.627716161033	silence	1	0.6458469305361234	346.07745768619225	0.982952846820104	51.03011037423505	395.9016331600759	0.00013008253919680895	-2.10740793507979	63.5179007023349
J5_190628-T001	J5	28/06/19	2	6	2pm	191	M	c	154.3476183710682	silence	1	0.6854694416119571	374.84535616336433	0.9994002756455752	34.6066984263137	430.07164557260177	0.00012422127712898395	-2.11743345810958	62.870865912712404
J5_190628-T001	J5	28/06/19	2	6	2pm	191	M	c	156.63531159434245	silence	1	1.0024495302186551	340.6309456538424	0.9199557501092276	38.299720430250495	418.7024981429277	0.00013539461431863662	-2.10864026669261	40.8224937791516
J5_190628-T001	J5	28/06/19	2	6	2pm	191	M	c	158.36808891536975	silence	1	0.7921520848359762	368.2712214484581	0.968375435342712	30.55424334382985	447.1886005341808	0.00017674537236842973	-2.0472550493991397	44.0718721412436
J5_190628-T001	J5	28/06/19	2	6	2pm	191	M	c	160.3634292090997	silence	1	0.699717857161005	340.3673063520012	0.9706398549308034	22.256110147111546	454.7277974634314	0.00040705109716711476	-1.9246994561562698	9.85027284173043
J5_190628-T001	J5	28/06/19	2	6	2pm	191	M	d	163.06374552804118	silence	1	0.7801109726646018
J5_190628-T001	J5	28/06/19	2	6	2pm	191	M	c	165.14756238909672	silence	1	0.7414031763110245	351.2213590483362	0.9870025244406792	25.120218918732352	563.1690617416417	0.00023283701369541457	-1.97472134124173	3.9135586183257
J5_190628-T001	J5	28/06/19	2	6	2pm	191	M	c	167.49758907060573	silence	1	0.581212087207092	349.7787177567607	0.9966970557465112	16.102331581144767	410.3685940624371	0.0003475979776792374	-1.9573039404757	14.2197692092838
J5_190628-T001	J5	28/06/19	2	6	2pm	191	M	d	168.91425678867319	silence	1	0.561293101310298
J5_190628-T001	J5	28/06/19	2	6	2pm	191	M	c	174.1342049997505	silence	1	0.7815596454589411	342.33981237211935	0.9967537025374528	9.332582102508413	390.35787779333344	7.878759639531115e-05	-1.98220270793181	33.5374479395743
J5_190628-T001	J5	28/06/19	2	6	2pm	191	M	d	176.75724149865638	silence	1	0.7130025211316422
J5_190628-T001	J5	28/06/19	2	6	2pm	191	M	c	197.19982048567346	silence	1	0.629070360719254	350.92106314910825	0.9867245584916298	22.001857094531765	478.2619142026173	8.166822154570465e-05	-2.02324014182566	7.51956512032278
J5_190628-T001	J5	28/06/19	2	6	2pm	189	M	c	201.12571324165455	silence	1	0.6937074121865692	278.9397486528431	0.8960626179840123	83.28768984802639	444.84651360917763	2.141748714809773e-05	-2.09634275474049	13.852758381201
J5_190628-T001	J5	28/06/19	2	6	2pm	191	M	c	210.6404015014237	silence	1	0.4692839844458092	363.36535545462016	0.9738225227981008	47.991329254243574	409.28203652529885	6.95893268623101e-06	-2.01717816693724	798.7522726937179
J5_190628-T001	J5	28/06/19	2	6	2pm	191	M	c	213.6797906090403	silence	1	0.9050476842883768	361.48343059713994	0.9978052668537164	30.619320157838782	499.96632176225705	0.00011622292174928996	-1.9689741404494598	6.700615791008071
J5_190628-T001	J5	28/06/19	2	6	2pm	191	M	c	233.39429890931976	silence	1	0.5506620057879843	372.354917182597	0.6519836910393002	17.060813543945358	398.58311134888936	1.039086511393185e-05	-2.0334213142172803	1071.12840234935
J5_190628-T001	J5	28/06/19	2	6	2pm	191	M	c	234.78821784144574	silence	1	0.8947337505642851	322.86561888432635	0.9825655841757516	36.32129243630818	365.8402965812168	0.00014480227718327495	-2.0220935438538	65.17035866816529
J5_190628-T001	J5	28/06/19	2	6	2pm	191	M	c	236.36455287076745	silence	1	0.6987690098067105	349.2051102388669	0.9985190315632304	32.55578823473013	388.1727518365445	0.0002753338347309293	-1.97055838571304	36.6132729311675
J5_190628-T001	J5	28/06/19	2	6	2pm	191	M	c	237.58308850738686	silence	1	0.518275169635217	350.32728595074616	0.9482862963647992	20.91955822696264	513.9338116428128	9.260922232872788e-05	-2.0617196330725602	36.0242560215673
J5_190628-T001	J5	28/06/19	2	6	2pm	191	M	c	269.68791939552835	silence	1	0.6832981092205159	350.4782364632244	0.9965936453949784	9.250801888566118	370.68401515166215	7.220815022897975e-05	-2.05588741672461	133.64876660608
J5_190628-T001	J5	28/06/19	2	6	2pm	191	M	c	1687.4619339344788	low	6	0.6684960328991565	336.1656644162691	0.8401709169791689	21.287370474747828	440.7887721361483	5.2799431277677694e-05	-1.935364136614	10.919010058706801
J5_190628-T001	J5	28/06/19	2	6	2pm	191	M	d	1692.9382105079321	low	6	0.7384195021065807
J5_190628-T001	J5	28/06/19	2	6	2pm	191	M	d	1704.1011549759153	low	6	0.4169722198719228
J5_190628-T001	J5	28/06/19	2	6	2pm	191	M	c	1737.173817531614	low	6	0.9034398097228404	331.9648666668244	0.9809316580577421	20.74133647389482	403.9793343030285	4.9961181355684896e-05	-2.00952274223836	24.667730704678302
J5_190628-T001	J5	28/06/19	2	6	2pm	191	M	c	1739.4186735607223	low	6	0.7991162017358421	341.4553068417703	0.9436945626610854	22.978801752769808	456.2818919403386	0.00014000090440443314	-2.02643727638065	11.864569970982098
J5_190628-T001	J5	28/06/19	2	6	2pm	191	M	c	1743.3120619158785	low	6	0.769223076606977	346.2153657972307	0.5123143484579169	20.670274497139246	414.56383959826724	9.749247461758178e-05	-1.95305517684816	16.6310161176351
J5_190628-T001	J5	28/06/19	2	6	2pm	191	M	d	1745.9895801398652	low	6	0.8361120397901232
J5_190628-T001	J5	28/06/19	2	6	2pm	191	M	c	1748.3306938512778	low	6	0.7775841970048987	378.4173333205245	0.9434354673423624	61.833444466716465	455.13464795224144	2.8646537074974693e-05	-2.20127372102539	62.7315674764946
J5_190628-T001	J5	28/06/19	2	6	2pm	191	M	c	1758.4169646573014	low	6	0.7859453174028204	365.5949950118344	0.6809231295604368	66.09765748648749	413.62147499539435	2.380615566224384e-05	-2.16663992058788	159.80078107684798
J5_190628-T001	J5	28/06/19	2	6	2pm	191	M	c	1763.0848469734533	low	6	0.668889631832144	370.87913876347335	0.7608632771731195	120.9740582158576	428.6500171733902	1.316096027868404e-05	-2.19201833523758	21.3592551569251
J5_190628-T001	J5	28/06/19	2	6	2pm	191	M	c	1765.4323271431724	low	6	0.9531677253607996	359.4869903353762	0.9836285834784741	31.52434731572197	486.6643001923399	0.00012631941823531255	-1.9290656448846	5.2791996009728495
J5_190628-T001	J5	28/06/19	2	6	2pm	191	M	c	1773.7236591099947	low	6	0.6939729930259091	401.8700465053045	0.9993811782627136	62.43188102841066	408.88777854156524	3.843705516807362e-05	-2.09489831714026	129.910299476012
J5_190628-T001	J5	28/06/19	2	6	2pm	191	M	c	1777.6197787593055	low	6	0.9615288457587212	395.5123713287109	0.3672634963294321	32.45931042877294	397.44695396061365	1.829508028683566e-05	-2.05083315171996	332.465531865009
J5_190628-T001	J5	28/06/19	2	6	2pm	191	M	d	1782.0330005954486	low	6	1.011695568146024
J5_190628-T001	J5	28/06/19	2	6	2pm	191	M	c	1785.6177641279446	low	6	1.0200566885439457	341.01653545546003	0.98546631357927	28.420114157702532	396.50415030281687	7.717454736152109e-05	-2.0684598075423	45.030695679631
J5_190628-T001	J5	28/06/19	2	6	2pm	191	M	c	1791.0516225462106	low	6	0.8110286785965855	347.68137618781304	0.8633527856855484	20.649757218086	395.8764934352782	4.120964426862528e-05	-2.08382894407162	84.1863020745868
J5_190628-T001	J5	28/06/19	2	6	2pm	191	M	c	1792.8173612093576	low	6	1.070223410931476	347.48711531198103	0.9558665442753498	38.50004657695445	401.9927424108317	9.20735397006956e-05	-2.13697221264727	146.880313870777
J5_190628-T001	J5	28/06/19	2	6	2pm	191	M	d	1795.2555264256189	low	6	0.9448066049628778
J5_190628-T001	J5	28/06/19	2	6	2pm	191	M	c	1811.0287389052921	low	6	1.0396932805826964	367.695148961307	0.9888554497973486	20.57497789768655	450.55979781680674	0.00033198204049363127	-1.93669555404547	12.9328863329337
J5_190628-T001	J5	28/06/19	2	6	2pm	191	M	c	1813.7157189300074	low	6	0.3850056105125077	386.16347165142867	0.5942357160209242	19.602694664243128	397.34292452039034	1.784975897860334e-05	-1.94026946547999	216.91689171639
J5_190628-T001	J5	28/06/19	2	6	2pm	191	M	c	1815.3721147505512	low	6	1.237445818889455	350.37893124834096	0.987811214270288	24.37735446850263	424.8760406833511	0.00019939358090817556	-1.95658159805875	14.563658215785699
J5_190628-T001	J5	28/06/19	2	6	2pm	191	M	c	1832.8953409836215	low	6	0.9113621233714184	394.0452798491984	0.994384645399701	38.0017765832713	404.94409458002264	8.966202057651896e-05	-2.03709499239333	562.384450346863
J5_190628-T001	J5	28/06/19	2	6	2pm	191	M	c	1834.689572438567	low	6	1.4799183104287297	341.2617731063118	0.9571399004992366	16.169030234369814	444.69313618992834	0.00012362565848894432	-1.99906320811261	13.3347352820191
J5_190628-T001	J5	28/06/19	2	6	2pm	191	M	c	1880.3534485476955	silence	7	0.8601046033504645	317.28298493337815	0.9885976989928069	13.172284098634233	360.8080315830385	7.492269514210042e-05	-2.01113200056581	28.582474864060604
J5_190628-T001	J5	28/06/19	2	6	2pm	191	M	c	1882.1473431761608	silence	7	0.7007115080987205	331.775356019644	0.9887289439603356	39.09806457254376	458.84153674559775	0.00017075929488702122	-1.970458924514	7.9926473005377305
J5_190628-T001	J5	28/06/19	2	6	2pm	191	M	c	1883.5939498007724	silence	7	0.8736530717994809	345.49276393726586	0.9999927422009536	18.205595942003924	477.8021715436915	0.00018497060349364185	-1.9538207350541001	6.872013860249011
J5_190628-T001	J5	28/06/19	2	6	2pm	191	M	d	1888.0046773957092	silence	7	0.7931457921456513
J5_190628-T001	J5	28/06/19	2	6	2pm	191	M	c	1894.7396084683544	silence	7	0.479880002532127	358.520102768682	0.993419012385332	15.043053145823308	404.7304268792303	6.157501867597185e-05	-2.07711095905633	48.0557305738693
J5_190628-T001	J5	28/06/19	2	6	2pm	191	M	c	1895.8495846297285	silence	7	0.6867601143192132	320.27036834150533	0.9693480323766442	30.256205452439648	550.1188164679434	0.00010501416322704987	-2.2094167356812098	7.06956509587696
J5_190628-T001	J5	28/06/19	2	6	2pm	189	M	c	1905.9686390520026	silence	7	0.6714236041361801	347.85438974080427	0.9046411282400328	22.837600720856013	449.5390279999301	6.102380600512245e-05	-2.06777975608037	13.355244724369399
J5_190628-T001	J5	28/06/19	2	6	2pm	191	M	c	1915.3074234813632	silence	7	0.6169728911083894	364.90350828093534	0.9918809476088748	31.85476190595733	401.90586342547346	0.00030417307475761457	-2.06131221610816	83.09408926189559
J5_190628-T001	J5	28/06/19	2	6	2pm	191	M	d	1919.5643052048727	silence	7	0.7353539938685572
J5_190702-T001	J5	02/07/19	3	10	2pm	191	M	c	70.36195927242778	silence	1	0.6026862109196571	381.33787172969664	0.8890391053421114	10.463973879237074	385.15146845916365	2.693105569213292e-06	-1.97467312043868	255.600134235205
J5_190702-T001	J5	02/07/19	3	10	2pm	189	M	d	73.94316582464131	silence	1	0.523981636764745
J5_190702-T001	J5	02/07/19	3	10	2pm	191	M	d	74.46714746140606	silence	1	0.7399296793837067
J5_190702-T001	J5	02/07/19	3	10	2pm	189	M	d	75.38738559696898	silence	1	0.8503531583299804
J5_190702-T001	J5	02/07/19	3	10	2pm	191	M	d	76.7847405224699	silence	1	0.6152814674131548
J5_190702-T001	J5	02/07/19	3	10	2pm	189	M	d	78.22799956584674	silence	1	0.5358903103275736
J5_190702-T001	J5	02/07/19	3	10	2pm	189	M	d	80.82783379847534	silence	1	0.8931505172126322
J5_190702-T001	J5	02/07/19	3	10	2pm	189	M	d	110.20146666169852	silence	1	0.4750490945970682
J5_190702-T001	J5	02/07/19	3	10	2pm	191	M	c	133.78096561357523	silence	1	0.577844289168155	358.33685074521566	0.9996487256503472	19.376723854097065	465.13691410458915	6.27904289074991e-05	-2.12744453987278	28.678192517098303
J5_190702-T001	J5	02/07/19	3	10	2pm	191	M	d	143.62732355334444	silence	1	0.8217065420057281
J5_190702-T001	J5	02/07/19	3	10	2pm	191	M	c	148.7012091275936	silence	1	0.8268422078932645	339.82881750784463	0.8133878244995079	23.93383878314177	381.8901229838504	0.00018088548818400503	-2.01539298487428	56.48664549282411
J5_190702-T001	J5	02/07/19	3	10	2pm	191	M	c	197.93492744212932	silence	1	0.7472393866364655	323.63440343084966	0.9376186880298962	25.3966513798797	530.066106845655	6.572071216885416e-05	-2.09138510123592	12.1549978813533
J5_190702-T001	J5	02/07/19	3	10	2pm	191	M	c	211.55061224900498	silence	1	0.9809121845193259	307.35711069722373	0.9947597293451726	18.41703978898096	363.5148906861591	0.00014595667196311906	-2.07051576192534	29.898785464981298
J5_190702-T001	J5	02/07/19	3	10	2pm	191	M	c	217.67667011294515	silence	1	0.4878882593158949	318.356033391183	0.9545816759110366	35.247509245665704	397.0741880885316	0.00014013240122689639	-2.08727915579595	20.0637697944335
J5_190702-T001	J5	02/07/19	3	10	2pm	191	M	c	297.30486326118665	silence	1	0.6727722312671744	364.4904178824611	0.9646293485587608	28.64134780325594	406.14370504309625	4.0491403024061026e-05	-2.06294914842978	511.704476722254
J5_190702-T001	J5	02/07/19	3	10	2pm	191	M	c	509.4115238107613	low	2	1.0638563446260605	324.72878187890836	0.9792469873702516	6.155958107197647	501.9986966513322	0.00016011438887205927	-2.14541060998007	21.0745343217667
J5_190702-T001	J5	02/07/19	3	10	2pm	191	M	d	552.9992000516793	low	2	1.0002796067789177
J5_190702-T001	J5	02/07/19	3	10	2pm	191	M	d	570.9744497985838	low	2	0.4731570630763144
J5_190702-T001	J5	02/07/19	3	10	2pm	191	M	c	594.3364024815388	low	2	0.5185457991506155	353.492748358841	0.911162002550398	19.663643013817705	425.9809004478577	0.00016805529969597985	-2.11229886668983	52.032291232644795
J5_190702-T001	J5	02/07/19	3	10	2pm	189	M	c	917.7360539186276	high	3	0.8130327249790525	324.9839834102601	0.5108344088605358	64.71518942589671	365.83998569276315	0.0001570427318295821	-2.15063315935239	22.516547191333103
J5_190702-T001	J5	02/07/19	3	10	2pm	191	M	c	1348.7270760974945	low	5	0.8081052539184839	321.9294103769307	0.7923690409034444	12.709892200878015	460.6497442914615	8.71543135320073e-05	-2.1370646726522198	18.072353674859603
J5_190702-T001	J5	02/07/19	3	10	2pm	191	M	c	1352.56131613476	low	5	0.7877646687941251	365.5503283913436	0.97724311165998	153.93753234525352	446.63854040355056	0.0005542094463328501	-2.21284241571444	92.15389896933029
J5_190702-T001	J5	02/07/19	3	10	2pm	191	M	c	1377.861220001796	low	5	0.7869184236465117	385.6551331303645	0.8663670716376359	19.49101266007318	411.0936699598285	0.0005895039476565229	-1.9925241043846798	39.701539401992505
J5_190702-T001	J5	02/07/19	3	10	2pm	191	M	d	1380.7187272032081	low	5	0.8534823866154966
J5_190702-T001	J5	02/07/19	3	10	2pm	191	M	c	1382.1643578740302	low	5	0.8350784537503841	343.95490708431765	0.9209201340391806	45.95364958656154	532.5550330015811	0.0002045695864723866	-1.8914528187647701	4.8960039757452805
J5_190702-T001	J5	02/07/19	3	10	2pm	191	M	d	1385.3626281946679	low	5	0.4074935204566828
J5_190702-T001	J5	02/07/19	3	10	2pm	191	M	c	1394.2610530152615	low	5	0.3451758577757573	346.68222014889193	0.9992842110108914	11.682745624172242	363.7434931810512	0.0004614912602227952	-1.98565857162478	88.99978307915208
J5_190702-T001	J5	02/07/19	3	10	2pm	191	M	d	1402.7445590526638	low	5	0.6554904826668917
J5_190702-T001	J5	02/07/19	3	10	2pm	191	M	d	1406.4153062702915	low	5	0.6877986349625189
J5_190702-T001	J5	02/07/19	3	10	2pm	191	M	d	1410.4617422595813	low	5	0.3581063235317288
J5_190702-T001	J5	02/07/19	3	10	2pm	191	M	d	1420.316836633577	low	5	0.5846680893196208
J5_190702-T001	J5	02/07/19	3	10	2pm	189	M	d	1632.5145745840052	high	6	0.4824344977350847
J5_190702-T001	J5	02/07/19	3	10	2pm	189	M	d	1649.826838173686	high	6	0.4974005137071345
J5_190702-T001	J5	02/07/19	3	10	2pm	189	M	d	1711.5884981258885	high	6	0.6241186360434767
J5_190702-T001	J5	02/07/19	3	10	2pm	191	M	d	1718.5305812433094	high	6	0.4278714096403746
J5_190702-T001	J5	02/07/19	3	10	2pm	191	M	d	1720.4502961988735	high	6	0.4546133727428696
J5_190702-T001	J5	02/07/19	3	10	2pm	191	M	d	1722.5182826780572	high	6	0.6097167587374771
J5_190702-T001	J5	02/07/19	3	10	2pm	191	M	c	1738.2487243432904	high	6	0.9097602665403884	335.88904272014685	0.8539614729872675	40.03154332442915	377.8951405321839	0.0004137493848420531	-1.99960586347938	10.6710908023102
J5_190702-T001	J5	02/07/19	3	10	2pm	191	M	c	1742.6502754677304	high	6	0.6952910406655519	261.6014033435437	0.4412777651500334	96.0726172210025	411.83679297702224	0.0005018537137382898	-2.2393776891611	25.6536856246428
J5_190702-T001	J5	02/07/19	3	10	2pm	191	M	c	1744.0293797635234	high	6	0.4882824585904473	346.32205438721604	0.8089757709768435	32.06537794148011	370.91323282410866	0.000327807143322718	-1.98913104861631	18.3778549483482
J5_190702-T001	J5	02/07/19	3	10	2pm	191	M	d	1745.6926583836828	high	6	0.4883144070483922
J5_190702-T001	J5	02/07/19	3	10	2pm	191	M	c	1916.8122411103327	silence	7	0.7603285916470668	346.25746096265794	0.998335388534928	59.66208116393324	431.7514828393907	0.00014378330709564818	-2.0407729000737898	20.481568504779602
J5_190702-T001	J5	02/07/19	3	10	2pm	191	M	c	1918.2818496452758	silence	7	0.8930232632621937	309.72546198213763	0.9969859489157578	29.75865107600072	415.05694994491273	0.0001012730646551027	-2.06431598234389	11.1502442074722
J5_190702-T001	J5	02/07/19	3	10	2pm	191	M	c	1948.2499914464609	silence	7	0.4396213974609964	362.9072508290745	0.9954141902411654	23.23974041535314	374.42758784650766	1.288643561019249e-05	-1.71899666858128	920.670074568906
J5_190702-T001	J5	02/07/19	3	10	2pm	191	M	d	1950.0907201753905	silence	7	0.5840844458728043
J5_190702-T001	J5	02/07/19	3	10	2pm	191	M	c	1973.80943776388	silence	7	0.5114042940228956	370.18430837757677	0.9987280092765218	15.42164424564146	384.331550537308	4.684880163493529e-05	-1.9700172226439399	743.413122574414
J5_190702-T001	J5	02/07/19	3	10	2pm	191	M	c	1977.379674707136	silence	7	0.7899262338960398	328.77345219702585	0.9891423944920166	6.561832673758148	567.4086512906457	8.801936760572032e-05	-2.03227774380749	5.16023426278671
J5_190702-T001	J5	02/07/19	3	10	2pm	191	M	c	2197.3356035709826	high	8	0.5282815942687193	323.35306087897675	0.8623444762225134	30.95539592409426	358.65520498703125	0.00013782328701424193	-2.15158065013981	18.173619523528
J5_190702-T001	J5	02/07/19	3	10	2pm	191	M	d	2198.788686200905	high	8	0.7816170715923363
J5_190702-T001	J5	02/07/19	3	10	2pm	191	M	d	2200.5687073943545	high	8	1.0431467381326909
J5_190702-T001	J5	02/07/19	3	10	2pm	191	M	c	2221.9836998194132	high	8	0.4106353184020009	330.4907868517714	0.824900565533672	94.30102430553416	398.9750004865405	0.00026027266310997793	-1.97013801408234	3.7238009702639
J5_190702-T001	J5	02/07/19	3	10	2pm	191	M	d	2223.519274231856	high	8	0.6746276625531209
J5_190702-T001	J5	02/07/19	3	10	2pm	191	M	d	2226.858568207445	high	8	0.4480808564740073
J5_190702-T001	J5	02/07/19	3	10	2pm	191	M	c	2236.8321464595033	high	8	0.6894873026976711	340.35022599661113	0.6946800086743138	114.70321986569037	364.5521789114328	0.00013528607001403003	-2.07853190169579	38.9044224133045
J5_190702-T001	J5	02/07/19	3	10	2pm	191	M	c	2242.9916364386468	high	8	0.312052443031007	347.9507367260166	0.5108903903775077	51.92009256971107	380.9216543247659	0.0007634401428995981	-2.06020895170888	26.0459708977812
J5_190702-T001	J5	02/07/19	3	10	2pm	191	M	d	2244.260486011129	high	8	0.7727012875056971
J5_190702-T001	J5	02/07/19	3	10	2pm	191	M	c	2246.589240794497	high	8	0.4245454859856181	330.00779867101886	0.8717263190975951	31.90840235789318	359.1368824527189	0.0006560103458726712	-2.0300327894949697	16.1206009722715
J5_190702-T001	J5	02/07/19	3	10	2pm	191	M	d	2249.1371482897634	high	8	0.3929032910987189
J5_190702-T001	J5	02/07/19	3	10	2pm	191	M	d	2250.9490628418293	high	8	0.5646663254847226
J5_190702-T001	J5	02/07/19	3	10	2pm	191	M	d	2254.8025282538824	high	8	0.5498066853406272
J5_190702-T001	J5	02/07/19	3	10	2pm	191	M	c	2259.704397960305	high	8	0.6122171739471014	351.34464802053077	0.7896187712687266	150.16828236348073	404.26272260063683	0.000347389233467474	-2.2498440775180297	17.886371473338603
J5_190702-T001	J5	02/07/19	3	10	2pm	191	M	c	2261.688600675633	high	8	0.546834757311899	392.7315857371256	0.8502835883615002	34.95874318278743	393.8509390588641	0.0004531065135902788	-2.02578896765548	246.96220527284302
J5_190702-T001	J5	02/07/19	3	10	2pm	191	M	c	2263.681527591733	high	8	0.7146680083405954	309.770380676138	0.480977310188961	111.52805191192198	359.0863383717452	0.00010641202259629892	-2.1131244690608897	24.0978004701731
J5_190702-T001	J5	02/07/19	3	10	2pm	191	M	c	2331.219113311506	high	8	0.4606488444746901	347.8611510556957	0.6465614362355809	45.744222088774784	369.03562839812963	0.00037544954192601787	-2.11981558322289	1017.31093151172
J5_190702-T001	J5	02/07/19	3	10	2pm	191	M	d	2333.4149291832723	high	8	0.5735821095713618
J5_190702-T001	J5	02/07/19	3	10	2pm	191	M	c	2335.395721029005	high	8	0.4443450915405265	367.24430546363027	0.7842632470642277	68.27058308051039	388.59093817199897	0.000347022100528788	-2.13673795552005	35.813880531506
J5_190702-T001	J5	02/07/19	3	10	2pm	191	M	d	2338.1516634862905	high	8	1.1115010827966216
J5_190702-T001	J5	02/07/19	3	10	2pm	191	M	d	2341.6600821138004	high	8	0.5200874050519815
J5_190702-T001	J5	02/07/19	3	10	2pm	191	M	d	2343.0139887287532	high	8	1.0669221623634255
J5_190702-T001	J5	02/07/19	3	10	2pm	191	M	d	2347.579176943271	high	8	0.817280207938893
J5_190702-T001	J5	02/07/19	3	10	2pm	191	M	c	2352.072129485508	high	8	0.4309295641860445	345.3373739695301	0.8837475181276642	55.67054971559072	357.95943882248946	0.00010793645045920606	-2.1021314942907803	28.596691346395897
J5_190702-T001	J5	02/07/19	3	10	2pm	191	M	d	2382.393029317621	high	8	0.5616943974559945
J5_190702-T001	J5	02/07/19	3	10	2pm	191	M	d	2383.806127134897	high	8	0.41606992404149423
J5_190702-T001	J5	02/07/19	3	10	2pm	191	M	c	2397.8020202052053	high	8	0.5765540376005447	350.55790680873497	0.8127328567393024	77.98182136617567	362.5449834241812	0.00045979493315365994	-2.0251101160951497	153.529868759548
J5_190702-T001	J5	02/07/19	3	10	2pm	191	M	c	2401.660053244696	high	8	0.34177172331965266	333.43461869048895	0.6360275855156026	66.46967654982558	349.8878006451081	0.00017388505155323795	-1.8687368160666498	461.04897162675104
J5_190702-T001	J5	02/07/19	3	10	2pm	191	M	c	2403.6054571998043	high	8	0.7994486397656146	256.6816985078733	0.607085359301037	86.15909576569905	417.97535190551554	0.0006018069100023301	-2.24721839078787	43.6418364507076
J5_190702-T001	J5	02/07/19	3	10	2pm	191	M	d	2409.3953550079395	high	8	0.4755084846187856
J5_190702-T001	J5	02/07/19	3	10	2pm	191	M	c	2411.061645086589	high	8	0.6865153746684882	340.17394545242166	0.6740192647630038	49.65252306279979	351.09305522258256	0.000236260840490579	-1.94308996103978	50.6843020440784
J5_190702-T001	J5	02/07/19	3	10	2pm	191	M	c	2419.642378526125	high	8	0.7162346549571339	342.9044265726432	0.8221856969214151	91.92167320840308	405.267082067227	0.00011220507177379002	-1.8793758221311598	2.05064537041964
J5_190702-T001	J5	02/07/19	3	10	2pm	191	M	c	2421.1238585755355	high	8	1.0045116737574062	337.3940460101602	0.7577497625854109	36.63231354099571	386.9856880258323	0.00021271793270525598	-2.0552546418406497	7.76012267201441
J5_190702-T001	J5	02/07/19	3	10	2pm	191	M	c	2423.343146738337	high	8	0.5498066853406272	336.2799243000772	0.8314755719018377	68.73250348355361	372.94374011167196	0.00040903510340400387	-2.0339966063068	10.991969470368499
J5_190702-T001	J5	02/07/19	3	10	2pm	191	M	d	2518.3167872451418	low	9	0.6801200209465605
J5_190702-T001	J5	02/07/19	3	10	2pm	189	M	d	2520.336948998585	low	9	0.6178189503252725
J5_190702-T001	J5	02/07/19	3	10	2pm	191	M	c	2521.925714974392	low	9	0.6126271944403925	347.3635900429554	0.8454106079980794	45.5481361361401	356.5396536746013	9.905249042589439e-06	-1.88411623009518	288.55345301337
J5_190702-T001	J5	02/07/19	3	10	2pm	191	M	c	2526.6302805453324	low	9	0.8975017760540139	341.3377481204507	0.8123561508855872	20.95793834803925	414.9809901768889	4.775833090557172e-05	-2.11102806713001	52.132649753238496
J5_190702-T001	J5	02/07/19	3	10	2pm	191	M	c	2528.217126364464	low	9	0.6533503432610814	350.1783631820781	0.993585909238332	10.260171028745958	391.51565153441317	0.0004394923360480757	-2.05459391937378	59.2262052185994
J5_190702-T001	J5	02/07/19	3	10	2pm	191	M	c	2533.775913776833	low	9	0.7325082903957991	329.54049244974516	0.977296949109072	23.54409365666209	444.7038109459928	5.737713405759056e-05	-2.0179561069949696	5.9984653055792805
J5_190702-T001	J5	02/07/19	3	10	2pm	191	M	c	2611.9065757703297	low	9	0.5249642747839971	362.7363104282018	0.9373738331868426	16.376608604542643	372.8133124573589	3.721066180249022e-05	-2.02179898397866	769.6063586947391
J5_190702-T001	J5	02/07/19	3	10	2pm	191	M	c	2615.54006895081	low	9	0.8676365544088185	396.95161203616095	0.8559859736904545	17.326909199996127	403.8500174367368	6.0359141683879394e-05	-2.0301311682346896	749.979337501064
J5_190702-T001	J5	02/07/19	3	10	2pm	191	M	d	2644.6919619138653	low	9	0.7336567910192571
J5_190702-T001	J5	02/07/19	3	10	2pm	191	M	c	2646.63227387244	low	9	0.70696963059072	347.7954226861219	0.9960399650816526	9.42343524348479	430.3611605531611	0.0004950213442504153	-2.04847965111638	14.1506729632271
J5_190702-T001	J5	02/07/19	3	10	2pm	191	M	c	2648.565931148916	low	9	1.0474456202914553	349.0561167911926	0.9202429857649572	27.70355823289549	573.6254931378779	0.0002719192802076792	-1.9762840910035602	2.7700299195994504
J5_190702-T001	J5	02/07/19	3	10	2pm	191	M	d	2653.171895198037	low	9	0.7271523314420847
J5_190702-T001	J5	02/07/19	3	10	2pm	191	M	d	2660.31777700016	low	9	0.609955538090162
J5_190702-T001	J5	02/07/19	3	10	2pm	191	M	d	2663.7374302484523	low	9	0.7650289799771599
J5_190702-T001	J5	02/07/19	3	10	2pm	191	M	c	2665.7738680674993	low	9	0.7621186146320724	376.2973905041382	0.9874938358701336	46.10273002463788	655.8559897768873	0.0005838079748618649	-1.98017514225771	2.15984054736876
J5_190702-T001	J5	02/07/19	3	10	2pm	189	M	d	2730.425911314882	low	9	0.6758297383926221
J5_190702-T001	J5	02/07/19	3	10	2pm	189	M	d	2737.550236119865	low	9	0.6294492661495497
J5_190704-T001	J5	04/07/19	4	12	2pm	191	M	c	24.310395608772854	silence	1	0.6484626491627097	349.58113655511397	0.9440017255797404	16.515896798146628	1146.8520574249076	0.0003795803178260209	-1.6916197042912702	0.259182961741692
J5_190704-T001	J5	04/07/19	4	12	2pm	191	M	c	25.586871952897674	silence	1	0.7606965692101006	347.69825494658346	0.8108153827207837	18.64153071847619	1113.832457546199	0.0019014689742323614	-1.7286574692030001	0.20449662411212602
J5_190704-T001	J5	04/07/19	4	12	2pm	191	M	c	27.66943546633936	silence	1	0.5674048180173727	331.8061293796857	0.9720309922278726	17.44392621431848	448.3537933268962	0.00016537867413153503	-2.0124972566394197	7.264931336376341
J5_190704-T001	J5	04/07/19	4	12	2pm	191	M	c	29.163563590753594	silence	1	0.6172865602606592	353.7413253309516	0.9818766052375071	22.448803082768112	1055.9581708782457	0.0010466490849507719	-1.7638518435435302	0.25508463785770497
J5_190704-T001	J5	04/07/19	4	12	2pm	189	M	c	31.298069533700318	silence	1	0.5206406846642935	410.576557580756	0.6068014359432936	237.20941839404296	881.2844918872569	0.0002900666997444231	-1.83401533327492	1.1587588185317201
J5_190704-T001	J5	04/07/19	4	12	2pm	189	M	d	33.03732630160633	silence	1	1.8580948985623849
J5_190704-T001	J5	04/07/19	4	12	2pm	191	M	d	38.283048773345854	silence	1	0.5268759024447007
J5_190704-T001	J5	04/07/19	4	12	2pm	191	M	c	39.872078697712546	silence	1	0.8230487470142123	371.57916061595915	0.9090720582924412	40.102177784877775	958.1462781644008	0.0007841500132271913	-1.82582838175598	0.363584672618725
J5_190704-T001	J5	04/07/19	4	12	2pm	191	M	d	41.91404329338821	silence	1	0.3958594153016648
J5_190704-T001	J5	04/07/19	4	12	2pm	191	M	c	43.24802775176569	silence	1	1.1223392004739168	354.27838809876505	0.9975831473696208	25.736193721046103	844.8412056915109	0.001606848789153836	-1.85916593756477	0.715995805441485
J5_190704-T001	J5	04/07/19	4	12	2pm	191	M	c	47.06007228283454	silence	1	0.4395828535189565	460.74731320166603	0.9660632351287176	65.5389311838855	489.21191150244596	2.38823908424385e-05	-2.0516507196640603	62.2601630957304
J5_190704-T001	J5	04/07/19	4	12	2pm	191	M	c	55.830881183882504	silence	1	0.35306928655069925	394.47932133231285	0.9904348608279352	4.623352861434057	524.2322154559766	3.3199025482093234e-05	-2.09351897478559	33.1823939900606
J5_190704-T001	J5	04/07/19	4	12	2pm	189	M	c	57.57129352417713	silence	1	0.748062194991256	458.00110042706314	0.8052325584479609	58.13670102853047	573.8262048229807	0.0004830776218428712	-2.03554953030321	6.15913034154953
J5_190704-T001	J5	04/07/19	4	12	2pm	189	M	c	60.15537357656142	silence	1	0.9414856672441232	438.86665832273616	0.6918324332765845	72.72675778686444	649.865222995521	0.0002165404982876117	-2.02265394455178	3.2194767539967297
J5_190704-T001	J5	04/07/19	4	12	2pm	189	M	d	62.190141982723034	silence	1	1.21452529094352
J5_190704-T001	J5	04/07/19	4	12	2pm	189	M	c	66.65878646022317	silence	1	0.95769847079508	465.9981804735775	0.9100432808439888	34.02495688121286	817.4867036167602	0.0006033977698000471	-2.04256567389187	1.5086567877191002
J5_190704-T001	J5	04/07/19	4	12	2pm	191	M	c	70.57845083511934	silence	1	0.2507170615383529	376.0785970292601	0.9999447234893132	7.405122035186879	389.71395812815547	1.997771742079537e-05	-2.06050434760257	314.296670528907
J5_190704-T001	J5	04/07/19	4	12	2pm	189	M	d	71.70062367423466	silence	1	0.7077419784174737
J5_190704-T001	J5	04/07/19	4	12	2pm	189	M	c	76.96014404286167	silence	1	0.5813594822714947	478.99923909918107	0.7692229054963484	44.28537232544051	701.6056221387416	0.0004971823979581986	-2.04292737654643	1.6747552648189699
J5_190704-T001	J5	04/07/19	4	12	2pm	189	M	d	78.65143485671899	silence	1	0.7928858308326596
J5_190704-T001	J5	04/07/19	4	12	2pm	189	M	c	81.10515462833281	silence	1	0.7386278709544314	438.8062694985421	0.4000585262377903	154.7402004516597	663.5299832737221	0.0006488455936346771	-2.07136915964587	3.8502736389523196
J5_190704-T001	J5	04/07/19	4	12	2pm	191	M	d	83.502824896906	silence	1	0.4720752481386086
J5_190704-T001	J5	04/07/19	4	12	2pm	189	M	d	84.29009552353797	silence	1	0.5596132799790894
J5_190704-T001	J5	04/07/19	4	12	2pm	189	M	c	86.30390278338841	silence	1	0.4016551834991304	464.9450081997856	0.7042003691821814	17.46855859488062	539.5423856597786	0.0018109863626279946	-2.2168827174987404	7.382592433171459
J5_190704-T001	J5	04/07/19	4	12	2pm	191	M	c	86.76417704596456	silence	1	0.5656960330223342	462.64832740296987	0.9692002265951006	229.4136347882261	710.7151630575852	0.0004171900839769773	-2.18938915068771	1.85864782844235
J5_190704-T001	J5	04/07/19	4	12	2pm	189	M	c	88.0218503177555	silence	1	0.4720752481386086	432.0360774369622	0.8986324682278717	40.06658687198336	462.5412751841813	0.000999558362452148	-2.17216876012606	21.6092544097402
J5_190704-T001	J5	04/07/19	4	12	2pm	191	M	c	88.53826412511152	silence	1	0.4642507965119904	501.43710662059374	0.946729720526532	32.57853501634054	743.3505259716038	0.00042707754142088473	-2.1636168076319597	1.3427946068465
J5_190704-T001	J5	04/07/19	4	12	2pm	189	M	c	89.67724583370247	silence	1	0.592438110437314	443.17120667949087	0.9873431433925791	20.34949124288937	452.9026593235394	0.005976601063613543	-2.1593505291079302	105.722286069693
J5_190704-T001	J5	04/07/19	4	12	2pm	191	M	d	90.30757242794681	silence	1	0.5235499580608831
J5_190704-T001	J5	04/07/19	4	12	2pm	189	M	d	91.55207430109795	silence	1	1.0197868620010695
J5_190704-T001	J5	04/07/19	4	12	2pm	189	M	c	94.72845084738171	silence	1	0.6285978927850238	468.51972793767646	0.7353053281311054	126.00275710024988	947.5220737516687	0.0014586647952525597	-1.94806429730343	0.7887130443889159
J5_190704-T001	J5	04/07/19	4	12	2pm	191	M	c	97.3887273486968	silence	1	0.4506621548168681	368.7391005466586	0.9869863349662188	18.50810817229626	1128.7020998674927	0.0012278139233305838	-1.6368204507444502	0.191854944996793
J5_190704-T001	J5	04/07/19	4	12	2pm	191	M	d	98.7381963061316	silence	1	0.7120250980212006
J5_190704-T001	J5	04/07/19	4	12	2pm	189	M	c	100.8761521739222	silence	1	1.067120287954708	406.44052968428963	0.6705487427725487	39.60329613215475	521.7134250740112	0.0007703464635128417	-2.1483566809958603	21.1837371312231
J5_190704-T001	J5	04/07/19	4	12	2pm	191	M	c	102.80915493790094	silence	1	1.125835067445507	368.20094660629996	0.8985584409245826	57.42884861833272	1222.3552042965096	0.003538407038127035	-1.61734704929811	0.0967819156509001
J5_190704-T001	J5	04/07/19	4	12	2pm	191	M	d	105.38054499172905	silence	1	0.6494294850083548
J5_190704-T001	J5	04/07/19	4	12	2pm	189	M	d	115.18096414159248	silence	1	0.5362780166164072
J5_190704-T001	J5	04/07/19	4	12	2pm	191	M	d	117.34331162830273	silence	1	0.4804157232188544
J5_190704-T001	J5	04/07/19	4	12	2pm	191	M	d	119.37306352820808	silence	1	0.8857107283244545
J5_190704-T001	J5	04/07/19	4	12	2pm	189	M	d	120.27136730006323	silence	1	0.5373031906423194
J5_190704-T001	J5	04/07/19	4	12	2pm	191	M	c	128.49565764774778	silence	1	0.5781440809813887	399.5408558577484	0.9992463231710488	8.895090240849811	434.4563874319648	0.00025447127153582603	-2.14627698786383	325.24098778842006
J5_190704-T001	J5	04/07/19	4	12	2pm	191	M	c	130.08769824072348	silence	1	0.6429527419959697	344.36218492380203	0.9797936620961	69.3844324108502	915.2046845495973	0.0002636927986205891	-1.93259877256506	0.721280392759076
J5_190704-T001	J5	04/07/19	4	12	2pm	191	M	c	132.0948973652097	silence	1	0.4491518859275629	379.5888344368808	0.9304534797714912	12.65317035084604	556.0065333040005	2.477804555925506e-05	-2.05496195125334	9.27750080848643
J5_190704-T001	J5	04/07/19	4	12	2pm	189	M	d	133.07888962208844	silence	1	0.5719724463689602
J5_190704-T001	J5	04/07/19	4	12	2pm	191	M	c	137.70251784669352	silence	1	0.7130705473825856	351.46578303605673	0.9946260487767626	24.67421706709803	443.77381757313685	0.0002770981579238137	-2.08817242116998	8.36472157596581
J5_190704-T001	J5	04/07/19	4	12	2pm	191	M	c	140.2324979758882	silence	1	0.7373546836711569	390.7058174903199	0.8618392976264057	15.246297718887151	543.8727093843845	3.5270666547884744e-05	-2.12493866090873	7.6677648737887
J5_190704-T001	J5	04/07/19	4	12	2pm	191	M	c	141.81380152043408	silence	1	0.7136058000718322	338.02208576293935	0.9977151379054584	11.29809464459322	534.5397470487391	0.0001919992067285493	-2.03751967313104	2.66756930240246
J5_190704-T001	J5	04/07/19	4	12	2pm	189	M	d	143.10407728203882	silence	1	0.4533495671044534
J5_190704-T001	J5	04/07/19	4	12	2pm	191	M	c	158.00405184835572	silence	1	0.6521205498887355	490.6547577372517	0.8471561752152988	22.128946210659365	527.6838287432956	0.0003695502812048987	-2.28381715732707	12.1373578887536
J5_190704-T001	J5	04/07/19	4	12	2pm	191	M	c	162.52941950393097	silence	1	0.7012738521868299	526.2992627738265	0.9981783889188068	31.71570716892768	558.8066733743848	0.0002627573725701923	-2.29599109989142	14.3047235405124
J5_190704-T001	J5	04/07/19	4	12	2pm	191	M	c	168.64782060081086	silence	1	0.7037989022153113	494.54122962395894	0.9950339762036008	31.001700100759365	545.5748751872244	0.0003292966938997065	-2.2846119714995297	8.60162870274741
J5_190704-T001	J5	04/07/19	4	12	2pm	191	M	d	170.88472642293056	silence	1	0.654838263595309
J5_190704-T001	J5	04/07/19	4	12	2pm	191	M	d	172.58372946117265	silence	1	0.9948504389236916
J5_190704-T001	J5	04/07/19	4	12	2pm	189	M	d	175.5461241186137	silence	1	0.5055515645529738
J5_190704-T001	J5	04/07/19	4	12	2pm	189	M	d	180.58105453197206	silence	1	0.5670204846774993
J5_190704-T001	J5	04/07/19	4	12	2pm	191	M	d	184.40750396012726	silence	1	0.7712590608518894
J5_190704-T001	J5	04/07/19	4	12	2pm	191	M	c	188.73732824082327	silence	1	0.5573571910800865	364.5477843137842	0.9886896094870338	21.292676676635324	483.99188219288595	0.00022682441602843586	-2.0549001792431203	6.39916100117892
J5_190704-T001	J5	04/07/19	4	12	2pm	191	M	d	197.5185640946944	silence	1	0.6774486888961064
J5_190704-T001	J5	04/07/19	4	12	2pm	191	M	c	202.28833321441346	silence	1	0.5934116218920167	495.92963429734107	0.9854882918784502	29.546787172245445	503.8677052235177	0.0002355787654177418	-2.22920126046692	53.656160632893496
J5_190704-T001	J5	04/07/19	4	12	2pm	191	M	c	205.62555034048677	silence	1	0.5098904804922029	511.3587551410282	0.756849157875388	93.05773247311674	589.3955594893616	9.711350040718005e-05	-2.19755959428193	6.086031183369349
J5_190704-T001	J5	04/07/19	4	12	2pm	191	M	c	207.50914667087073	silence	1	0.7111292803845686	349.6722522770472	0.6993468653162845	140.09687090405635	705.4915092562812	0.0001257675775951147	-2.06018500209743	1.76882130156093
J5_190704-T001	J5	04/07/19	4	12	2pm	191	M	c	209.7219375813575	silence	1	0.5979960975045628	347.34217990228166	0.8574748709216313	22.587425196826192	831.7556248452696	0.00046237363804005647	-1.84025283991799	0.9128612492802951
J5_190704-T001	J5	04/07/19	4	12	2pm	191	M	c	215.9349042340812	silence	1	0.5021014067785075	340.92134893586916	0.9996698654365759	12.31860113112623	454.1987324607669	9.250635647158649e-05	-2.0972057913277	9.24779210345578
J5_190704-T001	J5	04/07/19	4	12	2pm	191	M	c	220.79690112424115	silence	1	0.6390381540817316	337.9609735378672	0.8971740678858288	13.742904954939833	952.4556658373269	0.0006530083243995712	-1.74342507116994	0.571501360049147
J5_190704-T001	J5	04/07/19	4	12	2pm	189	M	d	221.4384103487953	silence	1	0.5242325982618752
J5_190704-T001	J5	04/07/19	4	12	2pm	191	M	c	222.82459513459446	silence	1	0.6882090607044233	333.5080382523312	0.9934325707203012	14.409375110687618	568.2720889187896	0.0003878777278846316	-2.066289288955	4.20445534209839
J5_190704-T001	J5	04/07/19	4	12	2pm	191	M	d	230.00857742093163	silence	1	0.6694777521891524
J5_190704-T001	J5	04/07/19	4	12	2pm	191	M	d	231.7725910787281	silence	1	0.3936431539540308
J5_190704-T001	J5	04/07/19	4	12	2pm	191	M	c	233.7165968926923	silence	1	0.7361901552726522	333.41273778506536	0.9701178399079694	7.6738969945722015	828.7344720625058	0.00013021543741249063	-2.01385986650205	0.9119610687493679
J5_190704-T001	J5	04/07/19	4	12	2pm	191	M	c	237.33823755845626	silence	1	0.8312129762257996	334.8204298481478	0.9611493343838144	8.228514428645155	718.6264850012172	0.00011359723287084726	-2.05112728012696	2.26389252610567
J5_190704-T001	J5	04/07/19	4	12	2pm	191	M	d	241.33469472105824	silence	1	0.6887242487379979
J5_190704-T001	J5	04/07/19	4	12	2pm	189	M	d	245.28366058153614	silence	1	0.5329521548509604
J5_190704-T001	J5	04/07/19	4	12	2pm	189	M	d	247.34824221895227	silence	1	0.7534943343356701
J5_190704-T001	J5	04/07/19	4	12	2pm	189	M	d	250.92573404895103	silence	1	0.7716664418324513
J5_190704-T001	J5	04/07/19	4	12	2pm	189	M	c	253.8431535618596	silence	1	1.2850913934035475	480.0046604178457	0.7774693187163467	30.96430833822245	929.6848472070056	0.0008538117738907902	-1.99106143468642	0.8641571915427041
J5_190704-T001	J5	04/07/19	4	12	2pm	191	M	c	255.93006211610347	silence	1	0.510324830476435	335.5035338841178	0.7295852811576171	12.097510979557686	474.63187031453725	0.00015816212811406148	-2.15004996164736	10.863260966133002
J5_190704-T001	J5	04/07/19	4	12	2pm	191	M	c	257.9329777283498	silence	1	0.7299792073482081	317.6137022797062	0.9909623433262744	10.95575358239836	491.6743335373282	9.634527781258769e-05	-2.13241330389396	6.61064680194189
J5_190704-T001	J5	04/07/19	4	12	2pm	189	M	c	259.93273061220725	silence	1	0.5499617105134575	388.59537427468786	0.5608967467393343	18.623001018251447	702.9772488576339	2.4943445583690305e-05	-1.83814552521621	2.8842789284004504
J5_190704-T001	J5	04/07/19	4	12	2pm	191	M	d	268.88971903042733	silence	1	0.29979774794867353
J5_190704-T001	J5	04/07/19	4	12	2pm	191	M	d	270.9740875810824	silence	1	1.0749890676445375
J5_190704-T001	J5	04/07/19	4	12	2pm	191	M	d	272.872474329512	silence	1	0.6413284591926639
J5_190704-T001	J5	04/07/19	4	12	2pm	191	M	c	274.15977097774993	silence	1	0.8001512346448862	362.76733716968175	0.9736499292023858	28.26864856712882	923.7941448946118	0.0020368290154612226	-1.75665199466278	0.7174110342806891
J5_190704-T001	J5	04/07/19	4	12	2pm	191	M	c	275.76045293947516	silence	1	0.9356691463418656	362.5325743461353	0.979419340519508	27.804505997773674	846.3670792047833	0.0019897446672936608	-1.8019413315229398	0.9481242696909499
J5_190704-T001	J5	04/07/19	4	12	2pm	191	M	c	277.38378867688203	silence	1	0.6568166816035728	373.7724956268795	0.9924856566576816	15.80105969622184	703.4499092071039	0.001163107783402847	-1.8837639702681899	1.73310677345577
J5_190704-T001	J5	04/07/19	4	12	2pm	191	M	d	278.983712851401	silence	1	1.0305551447613084
J5_190704-T001	J5	04/07/19	4	12	2pm	191	M	d	285.03822212059663	silence	1	0.5222689947035519
J5_190704-T001	J5	04/07/19	4	12	2pm	191	M	c	286.67159444066624	silence	1	1.0182843059156994	342.1539111014373	0.9488746510896204	30.6667921170191	943.196473770898	0.0007388617833226783	-1.8282321234593502	0.488706852076045
J5_190704-T001	J5	04/07/19	4	12	2pm	191	M	c	288.5387879748624	silence	1	0.8840918004849527	333.9532990023838	0.8242433736022021	47.44125849977678	916.735151994856	0.0009401393324099905	-1.74551500626161	0.6980387587942251
J5_190704-T001	J5	04/07/19	4	12	2pm	189	M	d	291.85783848791226	silence	1	0.8539985099059777
J5_190704-T001	J5	04/07/19	4	12	2pm	191	M	c	293.42814964366346	silence	1	0.5196137988151577	343.4437085555376	0.9176115537814464	126.73331557572705	493.6698528920545	5.3707425447440914e-05	-1.9543135705471497	7.836364603607089
J5_190704-T001	J5	04/07/19	4	12	2pm	191	M	c	294.85004753393434	silence	1	0.6252924457215272	365.92764086362234	0.9979712550057352	14.995036764160089	856.7998470236912	0.0009584698263263608	-1.7681896776557202	0.703443957029666
J5_190704-T001	J5	04/07/19	4	12	2pm	191	M	c	325.37698388656503	high	2	0.4435982212060594	319.9968043684237	0.8360574489194342	91.6203977000324	360.02357996165466	0.00018311555083960404	-2.17141528829589	26.195333421458997
J5_190704-T001	J5	04/07/19	4	12	2pm	189	M	c	327.46255509327875	high	2	0.5844520664821289	420.09701091480486	0.8864548093555265	186.22250297734672	451.68590838763237	0.0009783257685392413	-2.12449951724826	16.868567903160802
J5_190704-T001	J5	04/07/19	4	12	2pm	189	M	d	329.51240704940625	high	2	0.729310022233733
J5_190704-T001	J5	04/07/19	4	12	2pm	189	M	d	332.90552872108714	high	2	0.7598939909080401
J5_190704-T001	J5	04/07/19	4	12	2pm	191	M	c	334.8007855597994	high	2	0.4319369750855344	342.2643377201956	0.8861376392193147	32.4694915636	376.5614525865262	0.00015635631325843402	-2.09185972014341	7.02376330066508
J5_190704-T001	J5	04/07/19	4	12	2pm	189	M	c	347.9995987270781	high	2	0.6248766901801446	362.3174713956136	0.63701804402928	145.6230222993588	409.1491431933189	0.000537184913539069	-2.0551678453406	24.0702903551079
J5_190704-T001	J5	04/07/19	4	12	2pm	189	M	d	349.68347428005114	high	2	0.7249065878304464
J5_190704-T001	J5	04/07/19	4	12	2pm	191	M	d	355.4774299887693	high	2	0.5590075677300206
J5_190704-T001	J5	04/07/19	4	12	2pm	191	M	d	356.89912029545786	high	2	0.4868775589906136
J5_190704-T001	J5	04/07/19	4	12	2pm	189	M	d	357.81877790688463	high	2	0.5013035607385063
J5_190704-T001	J5	04/07/19	4	12	2pm	191	M	d	359.42940239158213	high	2	0.5409750655451262
J5_190704-T001	J5	04/07/19	4	12	2pm	191	M	c	360.82060425994234	high	2	0.6008429713270402	365.24335069143285	0.8923140297164478	64.43010312807706	649.8152650749487	0.001304447409152405	-1.8248702039720401	0.662668146604209
J5_190704-T001	J5	04/07/19	4	12	2pm	191	M	c	362.1806504886257	high	2	0.5590075677299637	346.48550940276067	0.6722853749298704	28.578859873268534	715.2462140655132	0.0010707707293493099	-1.7581905957644701	0.599953106989147
J5_190704-T001	J5	04/07/19	4	12	2pm	189	M	d	365.87122473842766	high	2	0.51071652562797
J5_190704-T001	J5	04/07/19	4	12	2pm	189	M	d	369.9868862720714	high	2	0.8222820996285805
J5_190704-T001	J5	04/07/19	4	12	2pm	189	M	c	370.94770556034564	high	2	0.466051900118714	448.8543750721032	0.6383742888390908	8.076978032695251	741.1293414217046	0.0028316305327019406	-2.01893433961798	1.5338885531575701
J5_190704-T001	J5	04/07/19	4	12	2pm	189	M	d	381.17420020572484	high	2	0.6353845794483846
J5_190704-T001	J5	04/07/19	4	12	2pm	191	M	c	383.4542421550708	high	2	0.6816285825868817	354.83662882592387	0.8169665865866563	40.96221652670374	365.9200276765615	0.000393363805957901	-2.04312773055689	22.053097086635198
J5_190704-T001	J5	04/07/19	4	12	2pm	191	M	d	385.04743904458616	high	2	0.3173720384531862
J5_190704-T001	J5	04/07/19	4	12	2pm	189	M	d	386.7301624811428	high	2	0.2488485301507808
J5_190704-T001	J5	04/07/19	4	12	2pm	189	M	c	388.4255822537792	high	2	0.3967150480664259	423.9552236200449	0.7326941618248012	13.33594223679057	525.1035996727678	0.0010317318815617929	-2.11132969127592	18.3585575532541
J5_190704-T001	J5	04/07/19	4	12	2pm	189	M	d	391.0849980364504	high	2	0.8111380112915185
J5_190704-T001	J5	04/07/19	4	12	2pm	189	M	c	393.5136644079969	high	2	0.3678630445706972	359.45606894033006	0.5966141908449776	32.57237011998143	440.7998994394568	0.00035914525811475196	-2.1131836203976597	15.092614083701699
J5_190704-T001	J5	04/07/19	4	12	2pm	191	M	d	394.78159410853476	high	2	0.6202710902854847
J5_190704-T001	J5	04/07/19	4	12	2pm	189	M	c	397.16887218695325	high	2	0.519336062923287	462.7016960115963	0.5521784598504099	22.77020079053784	808.7589457003879	0.002688809753310156	-2.01133916371779	1.30949289901323
J5_190704-T001	J5	04/07/19	4	12	2pm	189	M	d	399.08095345978376	high	2	0.4672568210892223
J5_190704-T001	J5	04/07/19	4	12	2pm	189	M	d	399.9555668830082	high	2	0.8017812486468188
J5_190704-T001	J5	04/07/19	4	12	2pm	189	M	d	401.91475815994346	high	2	0.4396864911934131
J5_190704-T001	J5	04/07/19	4	12	2pm	191	M	c	417.59605975946573	high	2	0.34224223216278915	341.4557794497061	0.8261339067959571	80.31445236949902	351.21632260195366	6.108895666613698e-05	-1.83036850013452	127.754834749682
J5_190704-T001	J5	04/07/19	4	12	2pm	191	M	c	419.080975388055	high	2	0.7210115655925051	364.0666977577222	0.8235577373886946	39.91480819845753	440.2355794287655	0.0004986463166810121	-2.00323911691334	4.06583375957859
J5_190704-T001	J5	04/07/19	4	12	2pm	191	M	c	420.4508973626807	high	2	0.5612468992989648	333.76079805116365	0.7453570938198093	111.91186942988651	388.7927200669989	4.4000522503745984e-05	-2.1386551934410503	46.982613783652894
J5_190704-T001	J5	04/07/19	4	12	2pm	191	M	c	422.39079050775473	high	2	0.5695087854666099	312.3519077226914	0.7714257258736271	100.8091885932646	371.0268137644651	8.081013029576209e-05	-2.40014845039978	6.48112145036713
J5_190704-T001	J5	04/07/19	4	12	2pm	191	M	c	427.1670572570876	high	2	0.6287716091104585	344.0291080645536	0.3702058150848752	83.66220473702755	417.3539703506967	0.00016228003084524996	-1.8566384888375602	1.5937661821226499
J5_190704-T001	J5	04/07/19	4	12	2pm	191	M	c	428.9366363067408	high	2	0.6464575496408429	344.0160652139867	0.3857196584008257	43.375784733557566	362.2636700342186	0.0005652073661244051	-2.08461229854941	24.64177651436
J5_190704-T001	J5	04/07/19	4	12	2pm	191	M	c	433.5274016832463	high	2	1.0962200345023805	340.51378310919023	0.937759980954834	11.326646823532885	623.1722956421	0.000821312432066803	-1.9696494580819	1.02933246587483
J5_190704-T001	J5	04/07/19	4	12	2pm	191	M	c	438.1829913288988	high	2	0.4503844059395306	349.92210883286276	0.8512931050472554	11.981400025525488	447.03764831145133	0.000667513495732735	-1.99581889259671	3.78475254825687
J5_190704-T001	J5	04/07/19	4	12	2pm	191	M	c	439.63407394628274	high	2	0.6344591200001446	331.98023831267665	0.8014452205805471	36.16748795312078	407.8667415481261	0.00014765468709793009	-2.29903803491504	1.92933105647613
J5_190704-T001	J5	04/07/19	4	12	2pm	191	M	c	441.3891376152302	high	2	0.6616987956043658	334.28351035850517	0.4416088575140689	53.136190643541575	368.3258083297953	0.0004174566025493922	-1.97836595718963	5.48707070122211
J5_190704-T001	J5	04/07/19	4	12	2pm	191	M	c	443.1629424958098	high	2	0.6054428949528871	337.3645496983821	0.8494274244656654	33.32139562903541	393.4138610661953	0.000412346249242516	-2.06197960999478	8.73313597876901
J5_190704-T001	J5	04/07/19	4	12	2pm	191	M	c	444.56575026240967	high	2	0.5018880467488884	332.14874473933656	0.5978843526789971	43.307199530941496	354.9219496707374	0.00021247994544387	-2.15107352051595	16.5177058519661
J5_190704-T001	J5	04/07/19	4	12	2pm	191	M	c	445.8552074702079	high	2	0.5027262612187542	329.2774427288734	0.5021163993283664	66.48684369222764	380.12080398511233	0.0001440871591497409	-2.13981537967133	8.59869651545702
J5_190704-T001	J5	04/07/19	4	12	2pm	189	M	c	446.93547212184717	high	2	0.6493533249153529	341.9930996282357	0.6794677244416343	156.81635483880032	654.8403690897086	0.0008753341340420231	-2.02366025967325	1.4303072946418702
J5_190704-T001	J5	04/07/19	4	12	2pm	191	M	c	448.7884318723709	high	2	0.568211058210295	350.9648310775756	0.2308864288310428	21.823553184720648	754.9036717114163	0.001033291013761191	-1.8911565677353501	0.70706993416425
J5_190704-T001	J5	04/07/19	4	12	2pm	189	M	d	449.9414953701493	high	2	0.6907038108716392
J5_190704-T001	J5	04/07/19	4	12	2pm	189	M	d	452.3774126268111	high	2	0.6959763590461989
J5_190704-T001	J5	04/07/19	4	12	2pm	191	M	c	454.1766218006314	high	2	0.5074281305087993	333.02810150705	0.6139711160743044	14.838729226424618	432.1773679495629	0.000627555727674427	-1.9817095698859901	3.63513053612872
J5_190704-T001	J5	04/07/19	4	12	2pm	189	M	d	454.99704298360354	high	2	0.9010406055763838
J5_190704-T001	J5	04/07/19	4	12	2pm	191	M	c	458.9600658295216	high	2	0.4078394319977292	324.118323965307	0.6705767328651063	15.319921439745483	448.2966059418975	0.00025855042395736604	-1.9312352156183898	1.70748973846028
J5_190704-T001	J5	04/07/19	4	12	2pm	191	M	c	460.6535885714108	high	2	0.5347502444810743	345.6355228270781	0.8735266728876104	45.186219407046394	525.4267315556673	5.521935528468298e-05	-1.9080883826631498	-0.10860060917224001
J5_190704-T001	J5	04/07/19	4	12	2pm	189	M	d	465.8121533716572	high	2	0.6847286443457392
J5_190704-T001	J5	04/07/19	4	12	2pm	191	M	c	466.869938097529	high	2	0.6529985314764986	339.53102012612806	0.8457318073410611	21.19407333324148	704.2319020330226	0.000680732925036502	-1.81758444186106	0.443106407470091
J5_190704-T001	J5	04/07/19	4	12	2pm	189	M	c	470.71307161672513	high	2	0.7750874330118904	397.6692873034185	0.4216291263711108	135.7670909312443	603.3713675823144	0.0009035426255065361	-2.07322393625213	1.91359379114092
J5_190704-T001	J5	04/07/19	4	12	2pm	191	M	c	475.9200049510137	high	2	0.6841880322655811	336.8453297746832	0.9406802069494432	12.806799267242011	655.5396742709831	0.000737997340125342	-2.08071384732512	1.15731250685104
J5_190704-T001	J5	04/07/19	4	12	2pm	189	M	d	479.0378514162252	high	2	0.5950881007054818
J5_190704-T001	J5	04/07/19	4	12	2pm	191	M	c	482.2017312814859	high	2	0.5220826866180914	346.67676439569885	0.7705488267807646	58.57287187204315	556.7548983193437	0.000658095687368619	-1.8850460540591498	1.6129405283372802
J5_190704-T001	J5	04/07/19	4	12	2pm	191	M	c	484.22514024987333	high	2	0.4098282658478638	309.5328132063747	0.8625139204336999	82.1942293777812	379.44972704792224	0.0001912089989648721	-2.3201714124184503	83.3326553447231
J5_190704-T001	J5	04/07/19	4	12	2pm	191	M	c	485.6711039590622	high	2	0.4789742166485098	358.57281925797514	0.9424994067723508	18.135671930224987	644.0516664078541	0.0018840444524616789	-1.8049967954358699	1.54084049650329
J5_190704-T001	J5	04/07/19	4	12	2pm	191	M	c	487.7382249609957	high	2	0.5144931831390522	334.1109213769284	0.8627202871714755	68.82009104712779	430.97170948081504	0.00019223736823159804	-2.0572030131606	2.12874093386949
J5_190704-T001	J5	04/07/19	4	12	2pm	189	M	c	500.36403592297364	high	2	1.10496032157522	405.98071241618135	0.6722420933683291	52.75490418029955	775.9245467316051	0.004159889244142672	-2.0109644434658103	1.17178528402535
J5_190704-T001	J5	04/07/19	4	12	2pm	189	M	c	503.50363526576683	high	2	0.5215735540873538	407.24190694031006	0.6094152944686112	40.901175739481566	659.2102934072501	0.0017935835781849921	-1.95471260368191	1.82027543193675
J5_190704-T001	J5	04/07/19	4	12	2pm	191	M	c	505.5431278500209	high	2	0.515965236301497	348.5866531653169	0.7009233980964682	26.505428054777155	416.46971888953766	0.0004289733240584719	-1.9928951999855602	6.06590940226206
J5_190704-T001	J5	04/07/19	4	12	2pm	189	M	d	508.52828850837034	high	2	0.7690790032986001
J5_190704-T001	J5	04/07/19	4	12	2pm	189	M	d	510.7912340727415	high	2	0.8689087398530546
J5_190704-T001	J5	04/07/19	4	12	2pm	189	M	d	513.094467630816	high	2	0.904343698492994
J5_190704-T001	J5	04/07/19	4	12	2pm	189	M	d	518.7887060111142	high	2	0.9132813164171694
J5_190704-T001	J5	04/07/19	4	12	2pm	189	M	d	521.5124449790632	high	2	0.5159094604666734
J5_190704-T001	J5	04/07/19	4	12	2pm	189	M	d	525.6204982338953	high	2	1.6686683748898758
J5_190704-T001	J5	04/07/19	4	12	2pm	189	M	d	530.9666021515802	high	2	0.5107165256280268
J5_190704-T001	J5	04/07/19	4	12	2pm	189	M	d	532.8796179343937	high	2	1.039458340395754
J5_190704-T001	J5	04/07/19	4	12	2pm	189	M	d	536.0114216134309	high	2	1.0622676273420666
J5_190704-T001	J5	04/07/19	4	12	2pm	191	M	c	538.2154782528108	high	2	0.6368935496067252	322.91987847921473	0.8812511768472453	42.98086914791151	339.5585591839352	0.000250621778529505	-2.01750374852651	67.8299782148488
J5_190704-T001	J5	04/07/19	4	12	2pm	189	M	d	539.3931304766119	high	2	0.6008429713270971
J5_190704-T001	J5	04/07/19	4	12	2pm	191	M	c	541.301455944877	high	2	0.5768092524739359	349.21546650385216	0.6437142440250745	83.99913896882269	391.41430976125895	0.00019333139466512288	-1.9927785065413899	4.98009774028134
J5_190704-T001	J5	04/07/19	4	12	2pm	189	M	d	542.5279852121348	high	2	0.6227086611309005
J5_190704-T001	J5	04/07/19	4	12	2pm	189	M	d	547.891853641461	high	2	1.1568877286709949
J5_190704-T001	J5	04/07/19	4	12	2pm	189	M	d	553.0694607496758	high	2	0.4866828067748656
J5_190704-T001	J5	04/07/19	4	12	2pm	189	M	d	556.6429308542671	high	2	0.4806743770616322
J5_190704-T001	J5	04/07/19	4	12	2pm	189	M	d	558.932864563079	high	2	1.563044718570154
J5_190704-T001	J5	04/07/19	4	12	2pm	189	M	d	562.9764916014227	high	2	0.3692113337808678
J5_190704-T001	J5	04/07/19	4	12	2pm	191	M	c	572.3752547913557	high	2	0.5107165256279131	334.8494017845169	0.9058473147179052	55.49272191583333	359.9069942942894	0.00012779240789223404	-2.05064655904722	54.9976092654376
J5_190704-T001	J5	04/07/19	4	12	2pm	191	M	c	575.0313755042156	high	2	1.1235763563815908	352.54533792332705	0.7729663836350491	38.443439502965596	472.1923640734	0.00031269168995362584	-1.8599995704268402	1.75537708006134
J5_190704-T001	J5	04/07/19	4	12	2pm	191	M	c	576.8109814014304	high	2	0.7183741460631836	379.1196206287549	0.6231378636549072	98.24901627215023	694.6032967900487	0.0011500394748866923	-1.8540098327200498	1.19911708815981
J5_190704-T001	J5	04/07/19	4	12	2pm	191	M	c	579.4738264664958	high	2	0.4542741488096453	335.4937714384049	0.778114000912127	66.35037029583333	370.34057652422274	0.00038549054118149106	-1.9468089537229498	9.816585992536288
J5_190704-T001	J5	04/07/19	4	12	2pm	191	M	c	580.6611403691685	high	2	0.7589574774991661	335.14123574803	0.3904951515502789	21.87249029400283	482.9923842708584	0.00036502179195465104	-1.96812417115363	1.1049959826017401
J5_190704-T001	J5	04/07/19	4	12	2pm	189	M	d	587.6360775674017	high	2	0.564792393047469
J5_190704-T001	J5	04/07/19	4	12	2pm	189	M	d	590.0710217887598	high	2	0.8209931855116109
J5_190704-T001	J5	04/07/19	4	12	2pm	189	M	d	594.8361703084338	high	2	0.5768092524740496
J5_190704-T001	J5	04/07/19	4	12	2pm	189	M	c	596.9434898797291	high	2	0.4686906649484399	308.3002991397929	0.5689943772111301	97.38943854027798	386.272076820666	0.000320380554788686	-2.09040258937679	4.62347633699732
J5_190704-T001	J5	04/07/19	4	12	2pm	191	M	c	602.9928278057827	high	2	0.40857322050237604	325.5772860578343	0.6342528065831342	82.31051119641626	393.08145660919496	0.00014524246306859797	-2.09582369786847	6.424155334947519
J5_190704-T001	J5	04/07/19	4	12	2pm	189	M	c	608.5084325061838	high	2	0.571223501751092	386.66691767097	0.7871544548896694	94.93552161567226	460.99774785167017	0.000979595160008694	-2.0961705510623	10.753443589481199
J5_190704-T001	J5	04/07/19	4	12	2pm	189	M	c	999.7303678939976	silence	4	0.758755309739513	467.7708667476175	0.7938077314160411	37.6379546202541	625.6083563658225	0.00030659634852577895	-2.0509116497696	4.69426669746706
J5_190704-T001	J5	04/07/19	4	12	2pm	189	M	d	1056.300405292091	silence	4	0.8693900620041859
J5_190704-T001	J5	04/07/19	4	12	2pm	189	M	d	1058.809781152876	silence	4	1.4753285900676474
J5_190704-T001	J5	04/07/19	4	12	2pm	189	M	d	1080.1679027941009	silence	4	1.0538061357626702
J5_190704-T001	J5	04/07/19	4	12	2pm	189	M	c	1128.3872684255907	silence	4	0.5587839633342355	481.09675118412287	0.7097577249096679	23.682151824951802	817.9983031278302	8.645156206457529e-05	-2.01513265747103	1.268582481573
J5_190704-T001	J5	04/07/19	4	12	2pm	189	M	c	1130.0003741460148	silence	4	0.6463637377751184	443.87633578642163	0.5798833454049209	244.77828601979846	578.2701033299771	0.0003278046831074238	-2.0603796852927	5.80182765166247
J5_190704-T001	J5	04/07/19	4	12	2pm	189	M	d	1135.5735618375445	silence	4	1.3692152731646274
J5_190704-T001	J5	04/07/19	4	12	2pm	189	M	d	1175.3158817164951	silence	4	0.9570124180877428
J5_190704-T001	J5	04/07/19	4	12	2pm	189	M	c	1182.7784382780005	silence	4	0.6629304448513267	499.6625084189661	0.5231332692183414	37.14737978758575	698.1749457881144	0.0001185055728743374	-2.09163273953757	2.1543335109518997
J5_190704-T001	J5	04/07/19	4	12	2pm	191	M	c	1208.3180860665445	silence	4	0.6048318482314698	347.94756943993735	0.9846773963890691	7.044267445553884	407.530251014905	1.192607190334525e-06	-1.95875751197053	100.632257549825
J5_190704-T001	J5	04/07/19	4	12	2pm	189	M	d	1214.8719372344142	silence	4	0.5890098735067113
J5_190704-T001	J5	04/07/19	4	12	2pm	191	M	d	1219.899239916539	silence	4	0.5347502444810743
J5_190704-T001	J5	04/07/19	4	12	2pm	191	M	c	1221.2206796273026	silence	4	1.0237546992170792	365.2400270130437	0.990294276578068	29.814371005501076	905.3810691999216	0.0006604038413952522	-1.8381093613185502	0.673510907399552
J5_190704-T001	J5	04/07/19	4	12	2pm	191	M	d	1224.340066226655	high	5	0.5236206406864312
J5_190704-T001	J5	04/07/19	4	12	2pm	191	M	c	1226.3358412488244	high	5	0.6665381554864781	327.6089962100276	0.7585174950662006	90.59528300987176	357.1713748391938	0.00019994758011897588	-2.09529591938632	24.749733817558305
J5_190704-T001	J5	04/07/19	4	12	2pm	191	M	c	1227.8189365013825	high	5	0.6770888698479212	350.1979192823603	0.6303059306817342	24.945214753415648	443.04084065672896	0.00023514794559972103	-1.90503492132402	2.86797508165743
J5_190704-T001	J5	04/07/19	4	12	2pm	191	M	c	1232.4709368914605	high	5	0.4323529118839815	338.8437006722869	0.5641989202944201	158.32826344905467	412.01018216189857	0.00029430882453510617	-2.2626395656568796	13.7263676691613
J5_190704-T001	J5	04/07/19	4	12	2pm	191	M	c	1233.7058482326438	high	5	0.6907072914204946	354.5368128161031	0.8058241992146762	81.944636061273	403.3769412984552	0.00043261059337120985	-2.01925690693338	9.843583939058039
J5_190704-T001	J5	04/07/19	4	12	2pm	191	M	c	1235.2691326429785	high	5	0.5873473519934578	349.4478339571841	0.7691813648431768	38.05618370491243	482.77378125803034	0.0008213898798855129	-1.9757794837666398	4.4375789414519105
J5_190704-T001	J5	04/07/19	4	12	2pm	191	M	c	1236.497052140762	high	5	0.6313632877847795	315.4582803027098	0.7507654038794456	31.21986189561892	454.78623172543763	0.00010832654377589503	-2.0070041566492303	1.49883893824521
J5_190704-T001	J5	04/07/19	4	12	2pm	191	M	d	1238.1271213056682	high	5	0.6911526799226522
J5_190704-T001	J5	04/07/19	4	12	2pm	191	M	c	1243.4327365700144	high	5	1.2807435314298343	341.6423831878909	0.6370811648691672	50.77173940991088	598.9151110877816	0.0003522856187733011	-1.6542249320206202	0.33529015865157696
J5_190704-T001	J5	04/07/19	4	12	2pm	191	M	d	1276.876382062062	high	5	0.3742819237077129
J5_190704-T001	J5	04/07/19	4	12	2pm	191	M	c	1278.0170566300694	high	5	0.6202921508361214	346.5056268006914	0.5070333420038348	91.71462839216845	432.23153400185066	0.0001695578907706201	-1.84203192525182	2.13664823302052
J5_190704-T001	J5	04/07/19	4	12	2pm	191	M	c	1279.4586227461036	high	5	0.5837442330782778	351.9076445088594	0.6096747485969997	44.090040851245135	436.68951950070084	-6.200927583608002e-06	-2.0998300572743602	-0.458611384537185
J5_190704-T001	J5	04/07/19	4	12	2pm	191	M	d	1281.2246607643249	high	5	0.8350078105690955
J5_190704-T001	J5	04/07/19	4	12	2pm	191	M	c	1283.3009040522861	high	5	0.4634884362565117	356.3183877851336	0.5496166918900809	64.57756686660156	513.7391569500062	0.00033432392431106896	-1.91986929475557	1.3134917803211499
J5_190704-T001	J5	04/07/19	4	12	2pm	191	M	c	1284.6017182052888	high	5	0.430627759389381	305.19706125771665	0.8116998509702482	111.3680918862912	375.67172617302936	4.5334302079149086e-05	-1.88390080533178	21.0390219310393
J5_190704-T001	J5	04/07/19	4	12	2pm	191	M	c	1286.3147032392367	high	5	0.4868941348361204	330.25802271784113	0.8336778118249174	85.38958143555283	368.55339273698655	0.00015454080318835805	-2.12483222010455	7.30097761414744
J5_190704-T001	J5	04/07/19	4	12	2pm	191	M	c	1287.6248342353758	high	5	0.7388818212957631	354.8042628567873	0.4097695434943685	22.67991356549709	526.9691575500383	0.00016477804233307615	-1.93843020597761	0.269421182886748
J5_190704-T001	J5	04/07/19	4	12	2pm	191	M	c	1290.7497374264376	high	5	0.366308378245094	309.0966111853414	0.8086047345811295	91.90589017630535	339.5520948799892	-0.00010780087505634598	-1.73080450446701	10.899573842916999
J5_190704-T001	J5	04/07/19	4	12	2pm	191	M	d	1306.3383769492493	high	5	0.4311041818859849
J5_190704-T001	J5	04/07/19	4	12	2pm	191	M	c	1310.6524405160008	high	5	0.5537597046059091	375.1856282232946	0.37981650803306255	49.118351951225634	702.4664343264881	0.000816387419826771	-1.78191360101002	0.625723927291773
J5_190704-T001	J5	04/07/19	4	12	2pm	191	M	c	1311.9964712007045	high	5	0.5984740407359368	352.92369392418124	0.7269965897485986	11.083243502824132	813.5312331154983	0.001092758908067768	-1.6981986111843796	0.20044809252871498
J5_190704-T001	J5	04/07/19	4	12	2pm	191	M	d	1320.811996181241	high	5	0.5894924808076212
J5_190704-T001	J5	04/07/19	4	12	2pm	191	M	c	1327.671360817029	high	5	0.5815390386178478	309.12874435710813	0.7113351996402978	69.04228363592796	358.39062951751055	-0.00012362910879255297	-3.9313325166997797	-8.71739939994508
J5_190704-T001	J5	04/07/19	4	12	2pm	191	M	c	1338.2663274328672	high	5	0.4532119610512382	310.7080248925037	0.958816203138104	79.27921146518912	339.6065696370343	1.28750528036411e-05	4.05993800426603	133.71577707518802
J5_190704-T001	J5	04/07/19	4	12	2pm	189	M	d	1338.9992987419494	high	5	0.6993971342471923
J5_190704-T001	J5	04/07/19	4	12	2pm	191	M	c	1339.9218556879962	high	5	0.5173250182631364	322.6865340079181	0.8685651185382094	59.100480601517184	356.52491100592107	-4.520496713436605e-05	-1.7807198066193	-8.47991486056771
J5_190704-T001	J5	04/07/19	4	12	2pm	189	M	d	1341.1664117633231	high	5	0.6778290567851855
J5_190704-T001	J5	04/07/19	4	12	2pm	189	M	d	1344.7044428295562	high	5	0.4209605540768279
J5_190704-T001	J5	04/07/19	4	12	2pm	189	M	c	1346.3229039912546	high	5	0.44124780969514177	315.3973302893009	0.735571862082329	69.22490836030926	381.86409423184824	0.0003141494696457239	-2.0149704051556	3.6384407590482497
J5_190704-T001	J5	04/07/19	4	12	2pm	191	M	d	1348.304702889635	high	5	0.6289049241631801
J5_190704-T001	J5	04/07/19	4	12	2pm	191	M	d	1354.8630097148787	high	5	0.7859899744103132
J5_190704-T001	J5	04/07/19	4	12	2pm	189	M	d	1375.2618975569392	high	5	0.9821977210287968
J5_190704-T001	J5	04/07/19	4	12	2pm	191	M	d	1381.303287840842	high	5	0.6427817692615463
J5_190704-T001	J5	04/07/19	4	12	2pm	189	M	d	1383.4072947936004	high	5	0.6107141408797361
J5_190704-T001	J5	04/07/19	4	12	2pm	191	M	d	1457.0091834903938	high	5	0.4074396615610567
J5_190704-T001	J5	04/07/19	4	12	2pm	189	M	c	1459.3245566741587	high	5	1.407518830847266	302.8260829699988	0.9301942785960888	115.49901674953476	519.7071666823412	0.0004309426825141069	-1.87596119988567	3.05186145791211
J5_190704-T001	J5	04/07/19	4	12	2pm	189	M	c	1466.1763649582272	high	5	0.7672565055370342	312.0922212577799	0.8209227346755803	117.29246142444616	478.995685811328	0.00041770546183714	-1.9390760932008502	3.2424992974487
J5_190704-T001	J5	04/07/19	4	12	2pm	191	M	d	1471.754232710288	high	5	0.35981684397597746
J5_190704-T001	J5	04/07/19	4	12	2pm	191	M	d	1479.66383687411	high	5	0.3492339956237629
J5_190704-T001	J5	04/07/19	4	12	2pm	191	M	c	1505.0914291291892	high	5	0.5941130716323642	325.0833994220612	0.8727798728036333	13.736997008245114	467.0810094849748	9.811248858648293e-05	-2.0009403931746	1.01347482124445
J5_190704-T001	J5	04/07/19	4	12	2pm	191	M	c	1506.6946401463074	high	5	0.8712233944513628	361.66791238079406	0.8633006458224589	50.8981548166862	530.4709213787258	0.000449985566179162	-1.91012531220653	1.43967285406499
J5_190704-T001	J5	04/07/19	4	12	2pm	191	M	c	1513.8933274959809	high	5	0.8123049398625426	330.8972425610878	0.3209871586755219	86.3799265504972	346.6606282605878	0.000249372364304521	-1.97811152949775	15.244550237752
J5_190704-T001	J5	04/07/19	4	12	2pm	191	M	d	1515.6283768242574	high	5	1.0127438211272874
J5_190704-T001	J5	04/07/19	4	12	2pm	189	M	d	1526.0920157378293	low	6	0.6307621561884389
J5_190704-T001	J5	04/07/19	4	12	2pm	189	M	d	1533.2954112988944	low	6	0.7793300374412411
J5_190704-T001	J5	04/07/19	4	12	2pm	191	M	d	1545.1693337425866	low	6	0.7350905204618812
J5_190704-T001	J5	04/07/19	4	12	2pm	191	M	c	1550.1455522158656	low	6	0.4593008409401591	326.583216445793	0.8764273248907303	53.17771647651647	396.13071959110533	2.6164197277566145e-05	-2.06440353344437	20.8034319386637
J5_190704-T001	J5	04/07/19	4	12	2pm	191	M	c	1553.7707890968304	low	6	0.4426344452094781	325.48199777738887	0.9518257280356508	3.5998817774652707	1279.7911062544642	0.0025178423015639177	-1.5004084025553999	0.0855677592450096
J5_190704-T001	J5	04/07/19	4	12	2pm	189	M	c	1558.1914700342356	low	6	0.7208911853263089	461.59292606967455	0.8702981068472516	41.30882587903324	620.195783977885	0.00021600439231363088	-2.0743513163701	4.48880910581613
J5_190704-T001	J5	04/07/19	4	12	2pm	189	M	c	1561.059954112047	low	6	0.6549444002723703	461.2288956713778	0.6181739393217838	30.13691748345883	633.2003691381365	0.00011540584945678152	-2.0664318875868704	3.24759687921813
J5_190704-T001	J5	04/07/19	4	12	2pm	191	M	c	1565.0339803537622	low	6	0.8087884682613549	318.4434176725834	0.9200367471008121	7.708325806720381	551.688573055783	3.387873041032036e-05	-2.16082994353649	7.15165738912305
J5_190704-T001	J5	04/07/19	4	12	2pm	189	M	d	1566.0721330897736	low	6	0.5872453753299851
J5_190704-T001	J5	04/07/19	4	12	2pm	191	M	c	1571.1687273288503	low	6	0.5450530981761403	330.54163333169674	0.9347699533786836	25.369765114837946	522.0266276110327	6.321562778658456e-05	-2.06224792536765	11.698624813263098
J5_190704-T001	J5	04/07/19	4	12	2pm	191	M	d	1777.9632173348832	low	6	0.41941962784653697
J5_190704-T001	J5	04/07/19	4	12	2pm	191	M	c	1782.6781977841397	low	6	0.4956777420006802	337.21358446789617	0.7932300018561194	12.204786853055166	385.4706352782592	3.922862736514253e-05	-2.10178222187659	33.5284914713256
J5_190704-T001	J5	04/07/19	4	12	2pm	191	M	c	1784.8338526430546	low	6	0.5297049527778199	328.1284224325193	0.8660189549114176	12.593947982753606	457.5027919079574	5.6875172823738786e-05	-2.1073233254016	11.3154546323005
J5_190704-T001	J5	04/07/19	4	12	2pm	191	M	c	1787.3169963863681	low	6	0.6308963988408323	366.98472158416644	0.9927272746349756	15.717941253779655	528.5077324191172	0.0001704115540044299	-1.97364905489555	7.254304216262731
J5_190704-T001	J5	04/07/19	4	12	2pm	191	M	d	1788.8327026723025	low	6	0.5815398299343997
J5_190704-T001	J5	04/07/19	4	12	2pm	191	M	c	1791.3744142341213	low	6	0.4883892886330159	350.6258029115106	0.9997830200502412	16.463515989430107	424.78518958654814	6.959516576337121e-05	-2.12265530679955	17.4245266619913
J5_190704-T001	J5	04/07/19	4	12	2pm	191	M	c	1813.1891897416428	low	6	0.5108824811986779	452.8578854781832	0.9021125039284278	65.00221884743797	461.1834356058381	0.00015594934708704233	-2.1906000245005397	77.4508329352369
J5_190704-T001	J5	04/07/19	4	12	2pm	191	M	c	1815.025732640654	low	6	0.4289852895560671	431.80341216255897	0.8931627507658964	68.93039963929874	445.83587770174944	2.533385710288159e-05	-2.1659078522571003	45.1962649839009
J5_190704-T001	J5	04/07/19	4	12	2pm	189	M	d	1815.860304022154	low	6	0.4835834173179592
J5_190704-T001	J5	04/07/19	4	12	2pm	191	M	c	1819.1470460935543	low	6	0.4218695600425235	404.471239224108	0.950670562143464	19.44652297922778	400.7409363749262	4.5091772998071936e-05	-2.0725790807693603	1852.8249335600897
J5_190704-T001	J5	04/07/19	4	12	2pm	189	M	c	1844.187081205583	silence	7	0.4780152866705976	410.58550323866206	0.8101076179583412	54.03648225378169	475.28836299089903	0.00026217202334981885	-2.04112495858947	15.6073995341593
J5_190704-T001	J5	04/07/19	4	12	2pm	189	M	d	1846.0400485403852	silence	7	0.37610704124017497
J5_190704-T001	J5	04/07/19	4	12	2pm	189	M	c	1847.511188003361	silence	7	0.6313020237626006	439.1065029959888	0.9945804759339149	25.17896292594889	564.1163723710305	0.0015955007060486732	-2.0828719121673	6.874195741997019
J5_190704-T001	J5	04/07/19	4	12	2pm	189	M	c	1849.0782716764654	silence	7	0.5425184748185075	491.72057325160165	0.9468529804471876	45.67459738194634	735.9781918398451	0.003170403827534094	-2.07623939439166	1.99170700149335
J5_190704-T001	J5	04/07/19	4	12	2pm	189	M	c	1850.1619061716526	silence	7	0.2814896469592441	450.1160644728343	0.8666923310065888	12.097227346277007	922.9031318876159	0.0014002113561068263	-1.9054509717377701	1.2001215540102
J5_190704-T001	J5	04/07/19	4	12	2pm	191	M	d	1960.6951018996285	silence	7	0.36520276450141853
J5_190704-T001	J5	04/07/19	4	12	2pm	191	M	d	1961.4293248525669	silence	7	0.4950967253821546
J5_190704-T001	J5	04/07/19	4	12	2pm	191	M	c	1962.651383057916	silence	7	0.5381583599032638	340.8814140329991	0.9611420304961874	21.84110856668724	916.4180957384089	0.0002624967545269841	-1.8776672255081401	1.10868160789892
J5_190704-T001	J5	04/07/19	4	12	2pm	189	M	d	1963.4028064567224	silence	7	0.4178475909254757
J5_190704-T001	J5	04/07/19	4	12	2pm	191	M	c	1964.1161395516986	silence	7	0.7865366417418045	296.557419207394	0.9825093457319825	3.284992433754041	655.9261974478021	8.26955669647415e-06	-2.22921250183889	4.92002645443094
J5_190704-T001	J5	04/07/19	4	12	2pm	191	M	c	1966.0683751222948	silence	7	0.5448082497487121	336.43849957731805	0.9747546370537656	25.99816059409875	452.1597718441901	3.3735000567203106e-05	-2.09341631170165	7.708872980023309
J5_190704-T001	J5	04/07/19	4	12	2pm	191	M	c	1971.0539151727166	silence	7	0.518668444896548	398.3243730346023	0.9894901260811412	25.79332814506677	416.71325693594366	3.0128355096571295e-05	-1.9546432498171002	184.643228538358
J5_190704-T001	J5	04/07/19	4	12	2pm	191	M	d	1973.1984397550848	silence	7	0.893024036085535
J5_190704-T001	J5	04/07/19	4	12	2pm	189	M	d	1975.7131995638345	silence	7	0.6776855886437261
J5_190704-T001	J5	04/07/19	4	12	2pm	191	M	c	2108.617949089265	silence	7	0.8213274146837648	339.4823780120338	0.9911171979163812	23.25538871945673	409.3385236412457	6.991898036809134e-05	-2.13633155677863	28.3835111793985
J5_190704-T001	J5	04/07/19	4	12	2pm	191	M	c	2110.359861377849	silence	7	0.7245641443269051	323.81570907882406	0.9606526203090044	21.046789192866527	495.61755840473467	0.00019930899430999958	-2.17692054867233	32.822319329558
J5_190704-T001	J5	04/07/19	4	12	2pm	191	M	c	2111.80857909911	silence	7	0.7763397929911662	339.7147970600968	0.985289808845058	14.985805877311748	474.937295484789	0.00024965557143229026	-2.1342226059883003	11.4089131454295
J5_190704-T001	J5	04/07/19	4	12	2pm	191	M	c	2113.1584559463804	silence	7	0.6628829029064036	336.7264755334145	0.9857212999947762	23.083539240469804	451.1589430756425	0.00015909891409567167	-2.15570342293791	22.853122727902697
J5_190704-T001	J5	04/07/19	4	12	2pm	191	M	d	2114.7670842663365	silence	7	0.41856667499178
J5_190704-T001	J5	04/07/19	4	12	2pm	191	M	d	2116.166328591486	silence	7	1.026917783181034
J5_190704-T001	J5	04/07/19	4	12	2pm	191	M	c	2117.7303327753175	silence	7	0.6223904471617061	354.4235130366782	0.9334625711887712	14.088540955104977	1175.0779520467918	0.0007019915040332438	-1.6119467746130902	0.31544185029476
J5_190704-T001	J5	04/07/19	4	12	2pm	191	M	c	2123.370794864646	silence	7	0.5691339652639726	389.33284228148	0.9166010842063148	27.46507809343853	771.604509164787	0.00028812025768847754	-1.8943112438886898	1.6815639037518701
J5_190704-T001	J5	04/07/19	4	12	2pm	191	M	c	2124.859297807724	high	8	0.7080119724682845	353.4141740883361	0.5793684669830803	11.33617441966112	746.8363127449022	0.00011637802136225703	-1.8872300173748502	0.24044200865405202
J5_190704-T001	J5	04/07/19	4	12	2pm	191	M	c	2127.5280642948564	high	8	0.5209799170756924	359.29638959882624	0.9269673197499688	80.63511182611853	413.5891181458071	0.00012284346258301093	-1.8275150706190901	2.63250952559142
J5_190704-T001	J5	04/07/19	4	12	2pm	191	M	c	2129.071020549325	high	8	0.5505053637243691	358.86984012997664	0.8438370617910291	57.170812219310896	368.57477640037774	3.450525517171893e-05	-2.6476427460574503	19.3252485558128
J5_190704-T001	J5	04/07/19	4	12	2pm	191	M	c	2130.9110128646616	high	8	0.4764752798514564	335.51402462012277	0.6213871681807527	45.398880436993856	434.32461768775636	0.0002031326656143261	-1.98766383374482	1.2380347714766102
J5_190704-T001	J5	04/07/19	4	12	2pm	191	M	d	2139.106674482679	high	8	0.5050088524990315
J5_190704-T001	J5	04/07/19	4	12	2pm	191	M	c	2144.811715344238	high	8	0.6440979706949292	329.60210999772966	0.8098615964504493	79.0000150793971	406.33189884390436	6.771941201183995e-05	-1.9978295422456203	1.49238957023404
J5_190704-T001	J5	04/07/19	4	12	2pm	191	M	d	2146.8716605894697	high	8	0.4149269647746223
J5_190704-T001	J5	04/07/19	4	12	2pm	191	M	c	2148.4691752574813	high	8	0.8124978879359332	359.6295316471904	0.6782870865448707	25.77464840531564	970.8547375545756	0.002295158577479139	-1.68199342844232	0.117351520115263
J5_190704-T001	J5	04/07/19	4	12	2pm	191	M	d	2151.9866751336044	high	8	0.8808085819587177
J5_190704-T001	J5	04/07/19	4	12	2pm	189	M	d	2156.885802605327	high	8	0.5729723822123559
J5_190704-T001	J5	04/07/19	4	12	2pm	191	M	c	2158.4822417985943	high	8	0.5467087750093924	332.7252718629999	0.3679793763339804	9.487905342066881	693.218522486043	0.0004215251047495932	-1.95753741368165	0.205627349473102
J5_190704-T001	J5	04/07/19	4	12	2pm	191	M	c	2160.2399109760568	high	8	0.4566166138297376	340.7713078737344	0.7675783683393164	13.552984048336045	976.5925326102347	0.002037483113435101	-1.64141345767129	0.273009156173551
J5_190704-T001	J5	04/07/19	4	12	2pm	191	M	d	2165.9219979821537	high	8	0.4479974684099943
J5_190704-T001	J5	04/07/19	4	12	2pm	191	M	c	2167.6163667147007	high	8	0.5618728158624435	337.9287081174343	0.8285134448550466	31.900156941471156	365.78888820131135	9.549597491112006e-06	-2.57151610712621	12.318162141774799
J5_190704-T001	J5	04/07/19	4	12	2pm	191	M	d	2169.117176213195	high	8	0.7444828022930778
J5_190704-T001	J5	04/07/19	4	12	2pm	191	M	c	2171.081102744532	high	8	0.7289450333450986	327.512559686685	0.5020025535945783	49.144638159949004	389.68041759173707	-1.6514738918960007e-05	-2.2089140836633	6.15271137305022
J5_190704-T001	J5	04/07/19	4	12	2pm	191	M	d	2173.5623301570363	high	8	0.4973531217096934
J5_190704-T001	J5	04/07/19	4	12	2pm	189	M	d	2175.6218400830007	high	8	0.4566166138297376
J5_190704-T001	J5	04/07/19	4	12	2pm	189	M	d	2178.3870135071725	high	8	0.6062528058887438
J5_190704-T001	J5	04/07/19	4	12	2pm	191	M	d	2179.8825161578093	high	8	0.6628976445795159
J5_190704-T001	J5	04/07/19	4	12	2pm	189	M	d	2180.6766739922004	high	8	0.4838508369148258
J5_190704-T001	J5	04/07/19	4	12	2pm	189	M	d	2182.809869252625	high	8	0.4222063852089377
J5_190704-T001	J5	04/07/19	4	12	2pm	191	M	c	2188.982374008151	high	8	0.5239292427168039	373.1114800539409	0.6505648229768108	67.3260382535995	382.91684141992533	-3.538060167820032e-06	-2.1310377647633203	1.4656418461653102
J5_190704-T001	J5	04/07/19	4	12	2pm	189	M	c	2189.700121415404	high	8	0.4106777175561547	334.1884321465366	0.6335247872975535	81.29298468686063	407.4628717488761	0.00017512315300676807	-2.2345042657338596	3.6797384283102996
J5_190704-T001	J5	04/07/19	4	12	2pm	189	M	d	2191.684335917578	high	8	1.0726264523154896
J5_190704-T001	J5	04/07/19	4	12	2pm	189	M	d	2196.189057905507	high	8	0.7160578716875534
J5_190704-T001	J5	04/07/19	4	12	2pm	189	M	d	2199.164420084504	high	8	0.6304773805463809
J5_190704-T001	J5	04/07/19	4	12	2pm	189	M	d	2200.9725039086807	high	8	1.1834373509268517
J5_190704-T001	J5	04/07/19	4	12	2pm	189	M	d	2202.9546691918126	high	8	0.91323322765993
J5_190704-T001	J5	04/07/19	4	12	2pm	189	M	d	2206.21751521287	high	8	0.9487331770969832
J5_190704-T001	J5	04/07/19	4	12	2pm	189	M	d	2209.035609043342	high	8	0.4440675173550517
J5_190704-T001	J5	04/07/19	4	12	2pm	189	M	d	2210.8858481782872	high	8	0.6159205500480311
J5_190704-T001	J5	04/07/19	4	12	2pm	189	M	d	2212.883919714954	high	8	0.5667265716069778
J5_190704-T001	J5	04/07/19	4	12	2pm	189	M	d	2219.1902793560707	high	8	0.941500822395028
J5_190704-T001	J5	04/07/19	4	12	2pm	189	M	d	2222.1236189382034	high	8	0.8055683989077806
J5_190704-T001	J5	04/07/19	4	12	2pm	189	M	d	2224.530684163359	high	8	0.5845869731997482
J5_190704-T001	J5	04/07/19	4	12	2pm	191	M	c	2225.6969721699247	high	8	0.4866820555857885	340.773563230249	0.6059825341272336	46.62684129088905	372.4409483681949	-0.00015581048375683498	-2.67032816273794	-3.3611580661471803
J5_190704-T001	J5	04/07/19	4	12	2pm	189	M	d	2232.470134424951	high	8	0.9340461722622422
J5_190704-T001	J5	04/07/19	4	12	2pm	189	M	d	2238.2232949643508	high	8	0.8807684475900714
J5_190704-T001	J5	04/07/19	4	12	2pm	189	M	d	2248.2135745615537	high	8	0.551805738690291
J5_190704-T001	J5	04/07/19	4	12	2pm	189	M	d	2267.839105460312	high	8	0.5578312911447938
J5_190704-T001	J5	04/07/19	4	12	2pm	189	M	d	2269.346503342053	high	8	0.4474360174945105
J5_190704-T001	J5	04/07/19	4	12	2pm	189	M	d	2271.1864844034985	high	8	0.7106285578497591
J5_190704-T001	J5	04/07/19	4	12	2pm	189	M	d	2273.998187855449	high	8	0.9386117811873192
J5_190704-T001	J5	04/07/19	4	12	2pm	189	M	d	2278.432649329969	high	8	0.6237745005487341
J5_190704-T001	J5	04/07/19	4	12	2pm	189	M	d	2280.7020574414732	high	8	0.8512990573558454
J5_190704-T001	J5	04/07/19	4	12	2pm	189	M	d	2283.689816338512	high	8	1.4553049109595122
J5_190704-T001	J5	04/07/19	4	12	2pm	189	M	d	2287.3020608115853	high	8	0.3994556279712924
J5_190704-T001	J5	04/07/19	4	12	2pm	191	M	c	2292.1157076343698	high	8	0.6298128337862181	333.47128870738237	0.8551740620997256	72.20413496495883	364.68444605871787	6.9356848014113e-05	-1.97782677489867	21.1432059649461
J5_190704-T001	J5	04/07/19	4	12	2pm	189	M	d	2294.014859890056	high	8	0.6475046872765233
J5_190704-T001	J5	04/07/19	4	12	2pm	191	M	c	2298.780391870256	high	8	0.42241352184510106	331.8896757822354	0.8727205123542477	82.06619553591594	347.73917271581735	3.21190085017471e-05	-2.2267370324292	351.722787960414
J5_190704-T001	J5	04/07/19	4	12	2pm	191	M	d	2301.781529544751	high	8	0.5259269546500036
J5_190704-T001	J5	04/07/19	4	12	2pm	189	M	d	2304.857241883439	high	8	0.8536753339717507
J5_190704-T001	J5	04/07/19	4	12	2pm	189	M	d	2307.013080221121	high	8	0.7917515526492025
J5_190704-T001	J5	04/07/19	4	12	2pm	189	M	d	2308.104858000455	high	8	0.8311254194891262
J5_190704-T001	J5	04/07/19	4	12	2pm	191	M	c	2311.618542083649	high	8	0.7312615124965305	346.07452261655726	0.47100945948544	48.37587538973645	384.6508904571196	0.000255997410821077	-2.0431498768967598	15.1234899707128
J5_190704-T001	J5	04/07/19	4	12	2pm	191	M	c	2313.070860163168	high	8	0.7588709827223283	350.7299830023735	0.6930943724053423	42.67960220260953	384.2345606745353	0.00023942872562305	-2.15707442302025	23.2210336699762
J5_190704-T001	J5	04/07/19	4	12	2pm	191	M	c	2314.653077778627	high	8	0.6194428820335816	374.64885537029	0.6754083713073775	25.944478951259896	503.0918868551468	0.0009069712257672139	-1.98300478611348	3.1684454117438703
J5_190704-T001	J5	04/07/19	4	12	2pm	191	M	c	2316.099411243682	high	8	0.8088457108483453	361.7242814028466	0.4867581389363921	42.730102947552545	568.1231668640727	0.000838176944107461	-2.00136573009308	2.77631789087344
J5_190704-T001	J5	04/07/19	4	12	2pm	191	M	c	2318.621073336312	high	8	0.9612404974163836	327.8742005046466	0.7017667670000343	20.564666925737697	564.3515403458143	0.0003717386364656441	-1.98786471352128	1.0809901356799998
J5_190704-T001	J5	04/07/19	4	12	2pm	191	M	c	2320.8497055444805	high	8	0.632887046183896	336.43628034336075	0.7363167519124755	12.364631159595374	509.4216377087983	0.00022815566606210398	-1.9581691564432702	1.9920868630133302
J5_190704-T001	J5	04/07/19	4	12	2pm	191	M	c	2322.5098854402772	high	8	0.7553197280362838	361.54128093120875	0.8613297034257331	37.92052275059712	522.4261321796836	0.0006394135707313868	-1.8802712039962	1.89232452605758
J5_190704-T001	J5	04/07/19	4	12	2pm	189	M	c	2325.021089147791	high	8	0.6139701955676173	392.6720295206743	0.7945922976913122	100.56097102863407	546.5092312795736	0.0005313969601269028	-1.9467723141326299	2.38297171509555
J5_190704-T001	J5	04/07/19	4	12	2pm	189	M	d	2326.9924967885563	high	8	0.7004460725806894
J5_190704-T001	J5	04/07/19	4	12	2pm	191	M	c	2328.288015983056	high	8	0.7122110227592202	338.6502451118555	0.9679527713569998	29.525643071226447	385.0531162380386	0.0007008725502694151	-2.07478543188937	13.0026124134114
J5_190704-T001	J5	04/07/19	4	12	2pm	189	M	c	2329.1680758342677	high	8	0.7812235835158391	413.3075847842362	0.7716407963049855	46.711468934895436	468.36747010726646	0.0012164674215237418	-2.1573724767574	13.425120571728
J5_190704-T001	J5	04/07/19	4	12	2pm	189	M	d	2331.0144216833405	high	8	0.7819985155233553
J5_190704-T001	J5	04/07/19	4	12	2pm	189	M	d	2332.676062629174	high	8	0.7424797059084085
J5_190704-T001	J5	04/07/19	4	12	2pm	189	M	d	2334.7012523360304	high	8	0.6953789534895805
J5_190704-T001	J5	04/07/19	4	12	2pm	189	M	d	2336.313427261992	high	8	0.7891742541928579
J5_190704-T001	J5	04/07/19	4	12	2pm	189	M	d	2339.4731717904842	high	8	0.5013197106554799
J5_190704-T001	J5	04/07/19	4	12	2pm	189	M	c	2341.6778381407994	high	8	0.4689765035163873	423.59435878778635	0.6178885886196868	19.326683561561307	495.9313943878421	0.00072886249248572	-2.17137130852256	11.3752764916872
J5_190704-T001	J5	04/07/19	4	12	2pm	189	M	c	2345.091203555157	high	8	0.8790097863661686	388.21326480289633	0.7002117893251188	38.15993184733304	725.8003671828218	0.0018577602841542882	-2.04936319749481	1.6215654953782201
J5_190704-T001	J5	04/07/19	4	12	2pm	189	M	d	2347.9816644598927	high	8	0.4497658517620948
J5_190704-T001	J5	04/07/19	4	12	2pm	189	M	d	2350.7554986285427	high	8	0.7535967263402199
J5_190704-T001	J5	04/07/19	4	12	2pm	191	M	c	2355.015691271993	high	8	0.5336629177945724	266.85364643455483	0.8807203921142132	72.98790569482455	437.88185849085295	0.00046620365340666113	-2.27326572846955	7.38729214636625
J5_190704-T001	J5	04/07/19	4	12	2pm	189	M	d	2356.1035961739835	high	8	0.8138756777866547
J5_190704-T001	J5	04/07/19	4	12	2pm	191	M	d	2357.834454890038	high	8	0.6141593744996499
J5_190704-T001	J5	04/07/19	4	12	2pm	191	M	d	2359.470915196327	high	8	0.4851481070859336
J5_190704-T001	J5	04/07/19	4	12	2pm	191	M	c	2360.682383344455	high	8	0.7406594434846738	349.0709476705601	0.8732049920696773	12.012715722950134	473.4730682058619	0.0008164986626187019	-1.9181469818471297	3.5673838824147404
J5_190704-T001	J5	04/07/19	4	12	2pm	189	M	d	2366.936532432815	high	8	0.5857762082068803
J5_190704-T001	J5	04/07/19	4	12	2pm	189	M	d	2369.237013668255	high	8	1.1386149858144563
J5_190704-T001	J5	04/07/19	4	12	2pm	189	M	d	2371.8754610018154	high	8	1.3307133524249366
J5_190704-T001	J5	04/07/19	4	12	2pm	191	M	c	2383.202905181536	high	8	0.4565692329210833	329.752307919817	0.7737533424949672	61.39012827874665	345.08723896772005	-8.678063492079807e-05	-1.6089183998200198	2.3552194772450497
J5_190704-T001	J5	04/07/19	4	12	2pm	191	M	d	2393.018711122781	high	8	0.6063259687721256
J5_190704-T001	J5	04/07/19	4	12	2pm	189	M	d	2395.898117224859	high	8	0.5988419974505632
J5_190704-T001	J5	04/07/19	4	12	2pm	189	M	d	2397.889023031133	high	8	1.1413280052192931
J5_190704-T001	J5	04/07/19	4	12	2pm	189	M	d	2399.352408938816	high	8	0.7458183004400779
J5_190704-T001	J5	04/07/19	4	12	2pm	189	M	d	2403.8004558766047	high	8	0.3688919801043085
J5_190704-T001	J5	04/07/19	4	12	2pm	189	M	d	2408.959399566884	high	8	0.6987757041733857
J5_190704-T001	J5	04/07/19	4	12	2pm	189	M	d	2410.976146671229	high	8	0.6652272623618956
J5_190704-T001	J5	04/07/19	4	12	2pm	191	M	c	2414.7886669336754	high	8	0.6614872931331774	359.5307358832992	0.5639174383918425	68.87845062410497	370.3976412059584	6.626097233294794e-05	-2.1736065530370103	22.6726155321211
J5_190704-T001	J5	04/07/19	4	12	2pm	189	M	d	2416.4428074531234	high	8	0.5667850382419601
J5_190704-T001	J5	04/07/19	4	12	2pm	191	M	c	2422.1957485890475	high	8	0.6315963311717496	315.2089138714615	0.5840378890606919	64.29980486568996	342.66260872609445	1.8414880262139022e-05	-1.7449267022520198	172.00794381038898
J5_190704-T001	J5	04/07/19	4	12	2pm	191	M	d	2424.339533477128	high	8	0.4201588578685005
J5_190704-T001	J5	04/07/19	4	12	2pm	191	M	c	2431.3105826406204	low	9	0.48681099870646	371.6933449692566	0.8750234909649219	31.959978101879013	378.0516229935111	2.3144709081735373e-05	-1.9287142413818503	376.01157911534403
J5_190704-T001	J5	04/07/19	4	12	2pm	191	M	c	2442.718674645549	low	9	0.6712867455848937	320.9512686649716	0.9746835962694632	13.997930502928	411.82914560300316	2.260135493125294e-05	-2.08866375007544	13.8329273347645
J5_190704-T001	J5	04/07/19	4	12	2pm	191	M	c	2446.79961745336	low	9	0.4458163882886765	316.72511122785636	0.98793434838279	13.037700864957685	332.47191438632336	4.36419436984162e-05	-1.97410640242324	115.012792114583
J5_190704-T001	J5	04/07/19	4	12	2pm	191	M	c	2449.292466587493	low	9	0.4816866724040665	305.65475182560465	0.9388188541148994	11.927598561873653	325.6581655396774	4.311734891056611e-05	-2.01085737173734	83.2220366986625
J5_190704-T001	J5	04/07/19	4	12	2pm	191	M	c	2451.98463567866	low	9	0.4940073645307166	341.97581356251914	0.93918785704697	17.266031108450026	428.75981333523697	0.00010793542825872548	-2.0921892515570804	12.868074522121802
J5_190704-T001	J5	04/07/19	4	12	2pm	191	M	c	2453.3146965434553	low	9	0.6529753954887383	325.26495652881727	0.9816901096326756	13.486616256328432	450.6399182204752	0.00016730152415331558	-2.1658945531843896	10.0210725782024
J5_190704-T001	J5	04/07/19	4	12	2pm	191	M	c	2454.988602360504	low	9	1.287824941975941	283.78340319349456	0.9853069875153178	7.547160231969428	398.12238816437326	0.00013664573317980692	-2.07059060264547	17.7558340381691
J5_190704-T001	J5	04/07/19	4	12	2pm	191	M	c	2458.041995811597	low	9	0.4672794686503039	320.79934915593134	0.8971138324021923	12.647459174762561	381.107114261674	8.047657184116433e-05	-2.05329327989289	24.3085960936076
J5_190704-T001	J5	04/07/19	4	12	2pm	189	M	d	2461.214373915155	low	9	0.5366902125565503
J5_190704-T001	J5	04/07/19	4	12	2pm	189	M	d	2463.1320783884344	low	9	0.8721524464699542
J5_190704-T001	J5	04/07/19	4	12	2pm	189	M	c	2466.096704376126	low	9	1.8037628583651892	439.62345497910906	0.6935259374855763	238.6027725881136	823.3532387060187	0.0008573729222481829	-1.97251535367236	1.35077905334553
J5_190704-T001	J5	04/07/19	4	12	2pm	189	M	d	2481.7678696732137	low	9	1.3693722553794032
J5_190704-T001	J5	04/07/19	4	12	2pm	189	M	c	2487.072526755111	low	9	0.7436678237536398	445.3654122301764	0.6100879660802847	262.7802245465694	688.9797265963248	0.0011662021118678412	-2.1261403422104697	2.8093202267510295
J5_190704-T001	J5	04/07/19	4	12	2pm	191	M	d	2494.285440767864	low	9	0.4748333294955955
J5_190704-T001	J5	04/07/19	4	12	2pm	191	M	c	2499.647865002737	low	9	0.6764481217992397	306.48501497855733	0.9809358403591693	13.885995638753855	334.37410310383467	9.125887175087361e-05	-1.93142708830506	27.8463768575377
J5_190704-T001	J5	04/07/19	4	12	2pm	191	M	c	2501.284801594123	low	9	1.200684929146064	322.80957292879435	0.9759947839741202	14.510373236417196	463.7621084013308	0.00011719875886021017	-2.0393126014543403	3.8313055437992998
J5_190704-T001	J5	04/07/19	4	12	2pm	191	M	c	2505.9831646665507	low	9	0.5345459913405648	386.00636179046137	0.6396959176345676	39.714703854282334	400.7195346149172	1.853979382577512e-05	-2.0512349458655	177.58084893277302
J5_190704-T001	J5	04/07/19	4	12	2pm	191	M	c	2507.6114238256523	low	9	0.7664266725150809	351.67807714979796	0.9609725829892144	30.57804601362721	722.782590932204	0.00036781556902501153	-2.04035712613118	1.9184631438446498
J5_190704-T001	J5	04/07/19	4	12	2pm	191	M	c	2509.459691818402	low	9	0.7348872390557517	340.84278183136865	0.9306106331116268	32.22337335843088	560.3482828609071	0.00022518515130967592	-2.12677177149391	6.38077656037186
J5_190704-T001	J5	04/07/19	4	12	2pm	191	M	c	2511.4196177484305	low	9	0.7029645913512468	322.0167857630168	0.8879257775323259	18.015700964589428	672.5713512927573	0.00021329684859883812	-1.98491638141934	1.22710164326016
J5_190704-T001	J5	04/07/19	4	12	2pm	191	M	c	2512.8921583275755	low	9	1.0031890522409412	328.0418294958976	0.9962265560623292	12.716545870249204	948.8955513026808	0.0005071734864734302	-1.88998434451685	0.561662375081977
J5_190704-T001	J5	04/07/19	4	12	2pm	189	M	c	2524.754523957057	low	9	1.2027500833978593	402.85737766520583	0.9018031597915742	217.128287470072	554.2954838200293	0.0008990502156943322	-2.04198270384807	7.6116571787926794
J5_190704-T001	J5	04/07/19	4	12	2pm	191	M	c	2533.053330110622	low	9	0.5264134001286038	442.527507035168	0.9291364320172751	20.102161206999316	437.4139116551424	1.3812798791319469e-05	-2.0719694932057897	210.619784869415
J5_190704-T001	J5	04/07/19	4	12	2pm	191	M	c	2534.792931283279	low	9	0.5217957387239949	367.8034024758976	0.9729663569972564	18.40960420551568	410.6018230147283	0.00017159098067967449	-2.04125911987499	61.598589097609796
J5_190704-T001	J5	04/07/19	4	12	2pm	191	M	c	2536.5698647344298	low	9	0.4617661404636237	398.25148629488683	0.987268486034126	24.60369048581117	414.9281790217054	5.2839484222157807e-05	-1.9575989512203702	180.15250856868198
J5_190704-T001	J5	04/07/19	4	12	2pm	191	M	c	2542.258645125245	low	9	0.6412215661684968	350.6630059193248	0.9742076560201651	21.045105028290774	579.4735452305642	0.0001562440946703529	-2.0412082182130398	2.98127949400852
J5_190704-T001	J5	04/07/19	4	12	2pm	191	M	c	2550.1386171310673	low	9	0.4248248492262974	434.28960599069336	0.95217502207658	53.749243879622725	452.30844961711335	7.713626596227236e-05	-2.14630425670528	489.77952434842797
J5_190704-T001	J5	04/07/19	4	12	2pm	191	M	c	2551.5018418064114	low	9	0.5464109264698891	387.7702538162443	0.9303333302524396	22.94046073878076	427.23454376194087	5.435389008251209e-05	-2.02170840715422	37.2722528957723
J5_190704-T001	J5	04/07/19	4	12	2pm	191	M	c	2553.0042198976143	low	9	0.7203551791235441	353.07187163653106	0.9904022227004268	28.445041198564468	537.1065699389424	0.00011511235745454078	-2.05601481139554	3.9940298040175497
J5_190704-T001	J5	04/07/19	4	12	2pm	191	M	c	2554.6372238707104	low	9	1.0389738160433808	396.2336230800015	0.9161611849284031	67.99556303628913	494.49976943251954	0.00022759646180222	-2.0915389422347097	12.330437478420901
J5_190704-T001	J5	04/07/19	4	12	2pm	191	M	c	2556.453993924685	low	9	0.9835618791876186	367.38967590064277	0.830025354681862	57.97085182155917	671.1264609344832	0.00018930790508532114	-2.01856629933221	2.5657637660479597
J5_190704-T001	J5	04/07/19	4	12	2pm	191	M	c	2558.4901399882165	low	9	0.6233842896258466	367.8900082679282	0.9222316130633572	21.84862204843859	395.9234036561247	1.987444322339719e-05	-1.84175781309618	75.5810669759103
J5_190704-T001	J5	04/07/19	4	12	2pm	191	M	c	2561.8405129871257	low	9	0.6861088021050818	344.9138126256541	0.9509032744784192	26.588072595365077	652.3982548915566	0.00011027079573397884	-1.9809327996959498	1.9132926494023201
J5_190704-T001	J5	04/07/19	4	12	2pm	191	M	c	2564.292710321737	low	9	0.6383091984066596	337.42314263285937	0.9288666283393106	38.878820652560364	645.6826321315386	0.00013548576880046385	-2.04555269070395	1.98065663555078
J5_190704-T001	J5	04/07/19	4	12	2pm	191	M	c	2565.8253243951444	low	9	0.7551492042684913	349.0091238572797	0.8613097348460274	20.783953803402824	1196.3131757544922	0.0002355221230439088	-1.6068174695405901	0.171308331295489
J5_190704-T001	J5	04/07/19	4	12	2pm	191	M	c	2572.9447779569477	low	9	0.7008405286187553	362.9175074683348	0.9386220302115152	22.0567345145792	804.5618105606272	4.2799722984121635e-05	-1.9005139728301599	0.616601264344443
J5_190704-T001	J5	04/07/19	4	12	2pm	191	M	c	2574.5194280270457	low	9	0.6620486174410871	318.53332522498266	0.8458914284387442	20.083726028443664	719.9985658561169	0.0001336731569159531	-1.93480042261372	1.1229357777009599
J5_190704-T001	J5	04/07/19	4	12	2pm	189	M	c	2576.599030900567	low	9	0.6325248785428812	429.8459489614718	0.737662327229355	46.209683151486274	501.8420041013727	0.0007847429697814086	-2.0532976365022297	14.1223537806602
J5_190704-T001	J5	04/07/19	4	12	2pm	189	M	c	2578.780237508437	low	9	0.7342817727503643	491.2587365058232	0.3870270221037605	41.45501073862158	641.937954720688	0.0006826082613225454	-2.06121285610983	3.95887069941954
J5_190704-T001	J5	04/07/19	4	12	2pm	189	M	d	2586.47830871295	low	9	1.4085373049056216
J5_190704-T001	J5	04/07/19	4	12	2pm	189	M	c	2589.3291666866103	low	9	0.6704471324792394	432.79264865232665	0.9017256044592329	138.04712823835348	831.7435181981807	0.0009800405870447793	-1.99623696459449	1.01037801471596
J5_190704-T001	J5	04/07/19	4	12	2pm	189	M	c	2590.9832310726442	low	9	0.7077903864428663	431.7872262033834	0.4813764671395045	172.22668173584094	734.0948698000781	0.0005920496166425844	-2.0898534243848204	2.41412658988477
J5_190704-T001	J5	04/07/19	4	12	2pm	189	M	d	2592.708730632038	low	9	1.0230000754231696
J5_190704-T001	J5	04/07/19	4	12	2pm	191	M	c	2604.763930055898	low	9	1.2674187049187822	328.30905631062285	0.9367956553188486	10.608895388181507	540.0568768764233	7.097014111136659e-05	-2.1967671549373997	5.867976678687951
J5_190704-T001	J5	04/07/19	4	12	2pm	191	M	c	2609.412861737938	low	9	0.5108974624477014	346.39324390707856	0.8776634713199312	13.857940020515173	398.03650583128893	1.524834117114098e-05	-2.07615286981562	129.453209612105
J5_190704-T001	J5	04/07/19	4	12	2pm	189	M	d	2615.676490931925	low	9	0.6828341084637941
J5_190704-T001	J5	04/07/19	4	12	2pm	191	M	c	2680.754711297605	low	9	0.8007335228749071	323.0164392766672	0.9175229353120532	34.96340832577897	424.5602360956872	3.0312615581821225e-05	-2.16440939496262	38.150104643944296
J5_190705-T001	J5	05/07/19	5	13	2pm	189	M	c	41.42479194187768	high	1	0.35889213778165185	225.31089170003966	0.7252358216180416	187.6783800039725	449.1494261410518	0.0038379838512393087	-2.07339569407001	66.5556228520244
J5_190705-T001	J5	05/07/19	5	13	2pm	189	M	d	45.06157362914328	high	1	0.7892865883635379
J5_190705-T001	J5	05/07/19	5	13	2pm	189	M	d	47.309496945136935	high	1	1.0425412790074589
J5_190705-T001	J5	05/07/19	5	13	2pm	189	M	d	49.812733211667044	high	1	0.6173536765233862
J5_190705-T001	J5	05/07/19	5	13	2pm	189	M	d	51.90743221423503	high	1	0.6256962937737001
J5_190705-T001	J5	05/07/19	5	13	2pm	189	M	d	58.06555298642412	high	1	0.5364635219997496
J5_190705-T001	J5	05/07/19	5	13	2pm	189	M	d	59.4821346771168	high	1	0.5852117157165821
J5_190705-T001	J5	05/07/19	5	13	2pm	189	M	d	62.793687589322026	high	1	0.8636014192817001
J5_190705-T001	J5	05/07/19	5	13	2pm	189	M	d	64.42468091149722	high	1	0.7098014910451127
J5_190705-T001	J5	05/07/19	5	13	2pm	191	M	d	70.8334074982628	high	1	0.7038962175270314
J5_190705-T001	J5	05/07/19	5	13	2pm	189	M	d	76.19577781526996	high	1	0.5592213069061245
J5_190705-T001	J5	05/07/19	5	13	2pm	189	M	d	77.62110666949488	high	1	0.4429956159640227
J5_190705-T001	J5	05/07/19	5	13	2pm	189	M	d	79.2758880980515	high	1	0.3413048462324184
J5_190705-T001	J5	05/07/19	5	13	2pm	189	M	c	82.03934414696353	high	1	0.5916944013271177	415.0992946861571	0.928097700799166	19.391377783636813	454.7468001124402	0.002060717817136317	-2.01961671282799	22.7684433013203
J5_190705-T001	J5	05/07/19	5	13	2pm	189	M	d	84.26419481362517	high	1	0.6273837008896948
J5_190705-T001	J5	05/07/19	5	13	2pm	191	M	d	90.15394829272863	high	1	0.5444452523524177
J5_190705-T001	J5	05/07/19	5	13	2pm	189	M	d	99.03385316961821	high	1	0.5921733911458915
J5_190705-T001	J5	05/07/19	5	13	2pm	189	M	d	100.4105810091148	high	1	0.6568131569676581
J5_190705-T001	J5	05/07/19	5	13	2pm	189	M	d	102.5211504104756	high	1	0.4791677531475074
J5_190705-T001	J5	05/07/19	5	13	2pm	189	M	d	106.58708511792662	high	1	1.3754404591668106
J5_190705-T001	J5	05/07/19	5	13	2pm	189	M	d	120.598632756327	high	1	0.6955413791355483
J5_190705-T001	J5	05/07/19	5	13	2pm	189	M	d	122.47957498093908	high	1	0.9001123729989189
J5_190705-T001	J5	05/07/19	5	13	2pm	189	M	d	129.76048647395413	high	1	0.8694267239194176
J5_190705-T001	J5	05/07/19	5	13	2pm	189	M	d	132.6603036071935	high	1	0.8591981742262362
J5_190705-T001	J5	05/07/19	5	13	2pm	189	M	d	136.02789930188104	high	1	0.8164077564372858
J5_190705-T001	J5	05/07/19	5	13	2pm	189	M	d	138.6383186210508	high	1	0.6525949701862429
J5_190705-T001	J5	05/07/19	5	13	2pm	189	M	d	142.56437423676977	high	1	0.7190393338610761
J5_190705-T001	J5	05/07/19	5	13	2pm	191	M	c	151.0877982755852	high	1	0.4507927092880664	304.2114460543138	0.9093589442438844	74.29699703030616	340.78328149679794	-3.777869074313698e-05	-3.33211907478717	-1.05453525932185
J5_190705-T001	J5	05/07/19	5	13	2pm	189	M	d	154.16563439100804	high	1	0.7187004034728091
J5_190705-T001	J5	05/07/19	5	13	2pm	191	M	d	159.84647602160362	high	1	0.4340350814028682
J5_190705-T001	J5	05/07/19	5	13	2pm	189	M	d	161.32740955165232	high	1	0.39626619785107664
J5_190705-T001	J5	05/07/19	5	13	2pm	189	M	d	180.529195949691	high	1	0.9654590138695768
J5_190705-T001	J5	05/07/19	5	13	2pm	189	M	d	185.23840651561474	high	1	0.5215193327892678
J5_190705-T001	J5	05/07/19	5	13	2pm	189	M	d	187.57863093867883	high	1	1.0771546696228145
J5_190705-T001	J5	05/07/19	5	13	2pm	189	M	c	197.16004115089092	high	1	0.4287116234177972	401.87339321331393	0.4979086069036852	18.997426555733053	476.2157547012209	0.001171739652835286	-2.05252615602882	24.120396236019396
J5_190705-T001	J5	05/07/19	5	13	2pm	191	M	d	197.87988648937332	high	1	0.4899100590962746
J5_190705-T001	J5	05/07/19	5	13	2pm	189	M	d	199.9783162024543	high	1	0.66737756478949
J5_190705-T001	J5	05/07/19	5	13	2pm	189	M	d	201.6531409629959	high	1	0.836264948532147
J5_190705-T001	J5	05/07/19	5	13	2pm	189	M	c	203.53256735366608	high	1	0.5121101313486633	416.8544844423812	0.2648005711221352	18.250858572401114	843.0185841051223	0.004013988619333298	-1.9939898335210902	1.84611112365231
J5_190705-T001	J5	05/07/19	5	13	2pm	189	M	d	205.49145494078056	high	1	1.0177366025988306
J5_190705-T001	J5	05/07/19	5	13	2pm	189	M	d	208.18991008484642	high	1	0.9779175913541279
J5_190705-T001	J5	05/07/19	5	13	2pm	189	M	d	210.1029055125312	high	1	0.7383964290647214
J5_190705-T001	J5	05/07/19	5	13	2pm	189	M	d	213.6185244038488	high	1	1.3948477829698618
J5_190705-T001	J5	05/07/19	5	13	2pm	189	M	d	216.08625938718063	high	1	0.5811816907595073
J5_190705-T001	J5	05/07/19	5	13	2pm	189	M	d	217.699812889097	high	1	0.4302834258710675
J5_190705-T001	J5	05/07/19	5	13	2pm	189	M	d	219.05406226163268	high	1	0.5696132971054908
J5_190705-T001	J5	05/07/19	5	13	2pm	189	M	d	221.07342016173115	high	1	1.1720100933249284
J5_190705-T001	J5	05/07/19	5	13	2pm	191	M	c	222.98463418476817	high	1	0.8222303490312868	326.52528951535334	0.8173573958420339	31.684190516753745	358.45824355250517	0.00015324044063168204	-2.0528586553676598	8.32120774131109
J5_190705-T001	J5	05/07/19	5	13	2pm	191	M	d	224.46084944797687	high	1	0.5643956935772394
J5_190705-T001	J5	05/07/19	5	13	2pm	189	M	d	234.62522434538243	high	1	0.5761681256979898
J5_190705-T001	J5	05/07/19	5	13	2pm	189	M	d	267.8616607620766	high	1	0.5127739342012205
J5_190705-T001	J5	05/07/19	5	13	2pm	189	M	d	269.5230620883486	high	1	0.7596485728058155
J5_190705-T001	J5	05/07/19	5	13	2pm	189	M	d	272.0259000625552	high	1	1.3113218783431078
J5_190705-T001	J5	05/07/19	5	13	2pm	189	M	c	278.5023335018684	high	1	0.7048432945858281	322.22230999350916	0.6940225863037516	83.95081648892796	531.2010428008584	0.000267653279127024	-2.10045060740201	1.79716581166221
J5_190705-T001	J5	05/07/19	5	13	2pm	189	M	d	287.65722382206644	high	1	0.6391862332557139
J5_190705-T001	J5	05/07/19	5	13	2pm	189	M	d	289.4207560672011	high	1	0.6770027014955531
J5_190705-T001	J5	05/07/19	5	13	2pm	189	M	d	309.43488802600183	high	1	1.3762346629267768
J5_190705-T001	J5	05/07/19	5	13	2pm	189	M	d	311.87030189812856	high	1	0.7284016903028601
J5_190705-T001	J5	05/07/19	5	13	2pm	191	M	d	313.8357323868997	high	1	0.4788392988339752
J5_190705-T001	J5	05/07/19	5	13	2pm	191	M	d	315.3958954546175	high	1	0.3507089252626656
J5_190705-T001	J5	05/07/19	5	13	2pm	189	M	d	315.85334556945804	high	1	0.25702999731413456
J5_190705-T001	J5	05/07/19	5	13	2pm	189	M	d	320.08870219149406	high	1	0.7638704387776443
J5_190705-T001	J5	05/07/19	5	13	2pm	191	M	d	323.8587594403099	high	1	0.4718546159685957
J5_190705-T001	J5	05/07/19	5	13	2pm	189	M	d	325.45729657878036	high	1	0.5521170275148961
J5_190705-T001	J5	05/07/19	5	13	2pm	191	M	d	327.8236337036561	high	1	0.6413889862008091
J5_190705-T001	J5	05/07/19	5	13	2pm	191	M	d	329.34571499031034	high	1	0.6106857530268712
J5_190705-T001	J5	05/07/19	5	13	2pm	191	M	d	330.5406722083825	high	1	0.4967147787870658
J5_190705-T001	J5	05/07/19	5	13	2pm	191	M	c	332.16777894672333	high	1	0.8342879294191334	344.9910832242784	0.6010718855349454	91.07796722882591	411.2101500926681	0.0003507445391277039	-1.98758666055374	5.662546669400611
J5_190705-T001	J5	05/07/19	5	13	2pm	191	M	c	333.5705849794318	high	1	0.5613949850061317	337.3897879094711	0.7558382820556919	33.82222632870162	438.09732910138206	0.000316196534433257	-2.0199020224921203	4.55571768464785
J5_190705-T001	J5	05/07/19	5	13	2pm	191	M	c	334.9556161985428	high	1	0.7632489052610936	333.63999004768397	0.6644459850258699	55.36971957761103	416.4362284692714	0.000174058588115221	-1.9805873890279901	3.91191886730847
J5_190705-T001	J5	05/07/19	5	13	2pm	191	M	d	336.41844643816813	high	1	0.6567333251492755
J5_190705-T001	J5	05/07/19	5	13	2pm	189	M	c	339.21730965426696	high	1	0.5579520795918143	257.670689872793	0.5268427045916891	59.928632640755474	771.9710088440924	0.0007569910396103839	-1.77805943292166	0.351419090861052
J5_190705-T001	J5	05/07/19	5	13	2pm	189	M	d	341.91053850857963	low	2	0.7056452771308273
J5_190705-T001	J5	05/07/19	5	13	2pm	189	M	d	366.8200706638063	low	2	1.3881869912214595
J5_190705-T001	J5	05/07/19	5	13	2pm	189	M	d	371.7646795817846	low	2	0.8002055764881675
J5_190705-T001	J5	05/07/19	5	13	2pm	189	M	c	373.7382259203625	low	2	0.7181045922534963	421.37858157518076	0.8683513471701841	31.292432428285107	463.0323311033198	0.002846320480186534	-2.09609526364932	87.08185863847031
J5_190705-T001	J5	05/07/19	5	13	2pm	189	M	d	377.041385692753	low	2	1.022897675078923
J5_190705-T001	J5	05/07/19	5	13	2pm	189	M	d	379.6949698445753	low	2	0.7586484602705355
J5_190705-T001	J5	05/07/19	5	13	2pm	191	M	d	381.3179810124631	low	2	1.2415481373843136
J5_190705-T001	J5	05/07/19	5	13	2pm	189	M	d	384.19766503948	low	2	0.8131240003000357
J5_190705-T001	J5	05/07/19	5	13	2pm	191	M	d	385.5503246897413	low	2	0.6208613368008287
J5_190705-T001	J5	05/07/19	5	13	2pm	189	M	d	388.0952185240901	low	2	0.8831316168734702
J5_190705-T001	J5	05/07/19	5	13	2pm	189	M	d	393.37649161680883	low	2	0.8216019550421265
J5_190705-T001	J5	05/07/19	5	13	2pm	191	M	d	394.3754437736002	low	2	0.3619391872432516
J5_190705-T001	J5	05/07/19	5	13	2pm	191	M	d	397.14744699146087	low	2	0.4843957429600323
J5_190705-T001	J5	05/07/19	5	13	2pm	191	M	d	398.65260796758685	low	2	0.7094008069967117
J5_190705-T001	J5	05/07/19	5	13	2pm	189	M	d	400.22778157411096	low	2	0.8071243875523351
J5_190705-T001	J5	05/07/19	5	13	2pm	189	M	d	402.3777375148496	low	2	0.9345040765895759
J5_190705-T001	J5	05/07/19	5	13	2pm	189	M	d	406.6862388030712	low	2	0.7444784055747391
J5_190705-T001	J5	05/07/19	5	13	2pm	189	M	d	408.19672386728126	low	2	0.6848824797990005
J5_190705-T001	J5	05/07/19	5	13	2pm	191	M	d	412.80098066503166	low	2	0.6481141056016213
J5_190705-T001	J5	05/07/19	5	13	2pm	191	M	c	414.9039417764397	low	2	0.5161965371213455	425.76675585928683	0.6211471067352745	99.23084107446584	453.8267234881158	1.731387049858071e-05	-2.18456562928291	17.9830867291272
J5_190705-T001	J5	05/07/19	5	13	2pm	189	M	d	415.78932382870437	low	2	0.8488453716423123
J5_190705-T001	J5	05/07/19	5	13	2pm	191	M	c	416.91818594534186	low	2	0.5847205422691104	302.1615537468241	0.8215431504123507	38.08777206912322	350.28852351820666	2.646733316859377e-05	-2.03846209134059	19.0277635932015
J5_190705-T001	J5	05/07/19	5	13	2pm	191	M	c	421.983947786409	low	2	0.6872302611492955	321.167694020121	0.9218427290244724	8.113904833271024	485.6096075862586	4.06015834404275e-05	-2.03208479004109	3.5226941297275003
J5_190705-T001	J5	05/07/19	5	13	2pm	191	M	c	423.4366544926054	low	2	0.954578713394426	361.4287834142009	0.9713880699208928	13.614538962721667	1053.0132768073295	0.0012348122511202787	-1.69563883131007	0.35849551017653497
J5_190705-T001	J5	05/07/19	5	13	2pm	189	M	d	424.4577436576983	low	2	0.4276139769846168
J5_190705-T001	J5	05/07/19	5	13	2pm	191	M	d	425.6087403256424	low	2	0.4816288170837879
J5_190705-T001	J5	05/07/19	5	13	2pm	191	M	d	426.70808970720435	low	2	0.679408507116193
J5_190705-T001	J5	05/07/19	5	13	2pm	189	M	d	429.8438958507221	low	2	0.5108556800030328
J5_190705-T001	J5	05/07/19	5	13	2pm	189	M	d	433.35074203855567	low	2	0.5645529444263389
J5_190705-T001	J5	05/07/19	5	13	2pm	189	M	d	435.5001918261106	low	2	0.4407193578990132
J5_190705-T001	J5	05/07/19	5	13	2pm	189	M	d	436.9336391802916	low	2	0.7747149894317431
J5_190705-T001	J5	05/07/19	5	13	2pm	189	M	d	438.8605976437999	low	2	0.9470991287374204
J5_190705-T001	J5	05/07/19	5	13	2pm	191	M	d	440.4888073832199	low	2	0.6428486082518248
J5_190705-T001	J5	05/07/19	5	13	2pm	189	M	d	441.19975321369196	low	2	0.4078579973509591
J5_190705-T001	J5	05/07/19	5	13	2pm	191	M	c	447.8355226289059	low	2	0.7573148281276191	318.05825566802133	0.9898832623623977	6.75509443245778	390.1011752431305	4.8274634939491086e-05	-2.03606421687206	8.96397007335229
J5_190705-T001	J5	05/07/19	5	13	2pm	191	M	c	458.553348570174	low	2	0.7345985489407099	344.93869634110865	0.9599971805984806	18.52544898867302	498.16254228377767	8.993484318202084e-05	-2.13599583233112	10.9467452861479
J5_190705-T001	J5	05/07/19	5	13	2pm	191	M	c	460.1316164263837	low	2	0.8858114750281629	380.4881107088591	0.9968089690055042	34.38060489407843	868.985266134491	0.00047102140450959397	-1.8751883928764999	0.618714116255808
J5_190705-T001	J5	05/07/19	5	13	2pm	191	M	c	462.32514587106425	low	2	0.8447690044334877	340.72000426864787	0.9789861212159932	23.81947103475943	1002.9043912826377	0.0007903583452030797	-1.72613121657655	0.395668265496118
J5_190705-T001	J5	05/07/19	5	13	2pm	191	M	c	464.05674481621537	low	2	0.8509502410512937	347.1757018223346	0.9181339718625952	138.75944124409705	959.2511628950324	0.00037031799500794675	-1.92832094405756	0.567541520032694
J5_190705-T001	J5	05/07/19	5	13	2pm	191	M	d	469.2769213087162	low	2	0.3691854634408287
J5_190705-T001	J5	05/07/19	5	13	2pm	191	M	c	475.5119260126362	low	2	1.1802728247279222	384.45825984801087	0.9847172243274822	141.69351800057046	785.7341379382716	0.002160703407317735	-1.96227219911033	1.43144408625893
J5_190705-T001	J5	05/07/19	5	13	2pm	191	M	c	477.22318114829835	low	2	0.7833542871905479	323.1357628409615	0.8821891856968817	25.526775882545618	1072.3930185274753	0.003460128083434929	-1.76752483790333	0.31773508465065803
J5_190705-T001	J5	05/07/19	5	13	2pm	191	M	d	479.48364459788286	low	2	0.7298283230903735
J5_190705-T001	J5	05/07/19	5	13	2pm	189	M	d	481.36272131994895	low	2	0.8455845501360386
J5_190705-T001	J5	05/07/19	5	13	2pm	189	M	d	483.3724545407196	low	2	1.0186358399373034
J5_190705-T001	J5	05/07/19	5	13	2pm	189	M	c	484.84705158964965	low	2	0.7817471873863724	392.0973230098256	0.9683987532977036	19.066586862343854	602.4728844768472	0.0009796957878203027	-2.08056143537858	5.36560038911682
J5_190705-T001	J5	05/07/19	5	13	2pm	189	M	d	487.7934818508761	low	2	1.2306947163717157
J5_190705-T001	J5	05/07/19	5	13	2pm	191	M	c	501.1512629697208	low	2	1.203779328957978	373.5977035530214	0.967998357077288	145.5276208707458	639.7446038507752	0.0013139426399806128	-2.07532288582109	2.68265220963938
J5_190705-T001	J5	05/07/19	5	13	2pm	191	M	d	503.0185563701371	low	2	0.9549167608269044
J5_190705-T001	J5	05/07/19	5	13	2pm	191	M	d	504.63836395173433	low	2	0.8180511216174295
J5_190705-T001	J5	05/07/19	5	13	2pm	189	M	d	507.160706431436	low	2	0.9668820971260176
J5_190705-T001	J5	05/07/19	5	13	2pm	189	M	d	509.81575341297815	low	2	1.0687478978790637
J5_190705-T001	J5	05/07/19	5	13	2pm	189	M	d	511.8532202693032	low	2	1.108564372372996
J5_190705-T001	J5	05/07/19	5	13	2pm	191	M	d	513.4868747263266	low	2	0.8700732928305115
J5_190705-T001	J5	05/07/19	5	13	2pm	189	M	d	516.4328031118972	low	2	0.7177685586348161
J5_190705-T001	J5	05/07/19	5	13	2pm	189	M	d	521.9734628278642	low	2	0.5944514934949439
J5_190705-T001	J5	05/07/19	5	13	2pm	189	M	d	523.3781990955314	low	2	0.597050428065927
J5_190705-T001	J5	05/07/19	5	13	2pm	191	M	d	526.390388210184	low	2	0.4995922126180403
J5_190705-T001	J5	05/07/19	5	13	2pm	189	M	d	529.130538953614	low	2	0.8157898155408247
J5_190705-T001	J5	05/07/19	5	13	2pm	191	M	c	536.6903359923188	low	2	1.1114748154292329	341.03453025549834	0.9941288692157436	27.698182208940977	442.247916892977	0.0004967057317169012	-2.12347741076356	8.82756346874617
J5_190705-T001	J5	05/07/19	5	13	2pm	191	M	c	540.993491807213	low	2	0.5013472669694465	253.73700591615116	0.9435012537356012	215.4747236710446	533.6294148204041	0.0001163261994981729	-2.2713273447412403	7.7632952807313895
J5_190705-T001	J5	05/07/19	5	13	2pm	191	M	c	545.2100011728213	low	2	0.4964302365888216	452.55745381837096	0.7450540894912064	74.0338710238425	478.91163399910636	0.00010338891314377227	-2.241367134032	27.568152102687698
J5_190705-T001	J5	05/07/19	5	13	2pm	191	M	c	546.6765560409788	low	2	0.8838266550911841	335.4349981428556	0.9749390777703278	8.572082636490562	484.96651065210784	0.00012430568589512337	-2.12787448909597	8.54769211626873
J5_190705-T001	J5	05/07/19	5	13	2pm	191	M	c	548.5368576187104	low	2	0.5838397094355514	336.76594561931694	0.9587707230382718	11.777677639269994	517.1642545881589	0.00016082964088839054	-2.12557415233731	5.670657252401191
J5_190705-T001	J5	05/07/19	5	13	2pm	191	M	c	555.0602700464408	low	2	0.5663134716119202	452.82514358609126	0.9564390247141502	35.615748772380364	477.90490956326636	0.0003555454183118342	-2.2293998945180498	27.316872805436397
J5_190705-T001	J5	05/07/19	5	13	2pm	191	M	c	557.8071107613376	low	2	0.8684573937837285	337.74510758135636	0.987242547391578	27.88694178958127	490.0428897988081	0.00018396721301095438	-2.1050973215197804	7.41123054640883
J5_190705-T001	J5	05/07/19	5	13	2pm	191	M	c	563.1589079497099	low	2	0.7528832159036938	384.8616522228782	0.9546069529010262	59.41203166121864	408.68441060275774	0.0003512352682618676	-2.10239170215395	187.33349890155102
J5_190705-T001	J5	05/07/19	5	13	2pm	191	M	c	567.3108495407997	low	2	0.4736836900624439	352.65220283013565	0.9271800912243104	49.50210715505784	434.3995591563709	0.00015810229451888327	-2.08786375138638	14.9293011075547
J5_190705-T001	J5	05/07/19	5	13	2pm	191	M	d	570.5572620904668	low	2	0.31377872978339383
J5_190705-T001	J5	05/07/19	5	13	2pm	191	M	d	573.0275097608294	low	2	0.8561519238272695
J5_190705-T001	J5	05/07/19	5	13	2pm	191	M	c	582.3062703059152	low	2	0.8446970236581137	332.58554397798605	0.8339166812470863	36.230664885873814	431.05628907709604	0.000479430497810806	-2.04732135910745	8.73880894971888
J5_190705-T001	J5	05/07/19	5	13	2pm	189	M	d	635.8050128384434	low	2	0.7277506364810051
J5_190705-T001	J5	05/07/19	5	13	2pm	189	M	d	722.5558640308443	silence	3	0.5934643862316307
J5_190705-T001	J5	05/07/19	5	13	2pm	189	M	d	727.5987831936917	silence	3	0.5844690500327943
J5_190705-T001	J5	05/07/19	5	13	2pm	189	M	d	728.9613467132747	silence	3	0.5346493951315097
J5_190705-T001	J5	05/07/19	5	13	2pm	189	M	c	781.1752634695104	silence	3	0.8385007028252858	418.565397606402	0.8609091046945249	20.40374115622245	517.3884684255024	0.000933170681554185	-2.1502043626536103	32.0664688544949
J5_190705-T001	J5	05/07/19	5	13	2pm	191	M	c	979.9606153646181	high	4	0.6401475940330101	338.5366982743378	0.4688422264376421	76.68870523925517	371.27368505898477	0.00011805567932122291	-2.58792625480342	20.1176098215811
J5_190705-T001	J5	05/07/19	5	13	2pm	191	M	c	982.4884565136682	high	4	0.5288175776795471	309.8222193821178	0.6725059890018835	54.46081103238539	366.8179561337915	0.00011235408387120496	-2.16892239580081	8.45370282099037
J5_190705-T001	J5	05/07/19	5	13	2pm	191	M	c	983.808098562629	high	4	1.0228445252485017	326.9121780688958	0.8035977149290727	30.634008204971447	381.72044338981163	0.00013225920875735105	-2.1853073179906	6.90005153278456
J5_190705-T001	J5	05/07/19	5	13	2pm	189	M	d	1560.1768850920794	silence	6	0.4542901556126253
J5_190705-T001	J5	05/07/19	5	13	2pm	189	M	d	1562.3865244483654	silence	6	0.7901016736725524
J5_190705-T001	J5	05/07/19	5	13	2pm	189	M	d	1656.704978301405	silence	6	0.3840879920319367
J5_190705-T001	J5	05/07/19	5	13	2pm	189	M	d	1659.2695385510767	silence	6	0.9134821800125792
J5_190705-T001	J5	05/07/19	5	13	2pm	189	M	d	1694.5490444033985	silence	6	0.6052557135599272
J5_190705-T001	J5	05/07/19	5	13	2pm	189	M	d	1740.8823630499091	silence	6	0.6694228669928179
J5_190705-T001	J5	05/07/19	5	13	2pm	189	M	c	1743.3488667117679	silence	6	1.2877351243232624	419.62426262192633	0.8641511985857886	48.162399428777455	511.6834863986997	0.001302373427499654	-2.04980769907842	14.318440394135198
J5_190705-T001	J5	05/07/19	5	13	2pm	189	M	c	1751.1543509018618	silence	6	0.6757886120331023	418.7784045568228	0.9318201863108364	40.59207432010032	560.3557384311463	0.001906778103683078	-2.1645009543098603	15.9911290785345
J5_190705-T001	J5	05/07/19	5	13	2pm	189	M	d	1753.4424857252611	silence	6	0.4585798542698285
J5_190705-T001	J5	05/07/19	5	13	2pm	189	M	d	1755.767227962304	silence	6	0.8978748537506362
J5_190705-T001	J5	05/07/19	5	13	2pm	189	M	d	1757.4327913755994	silence	6	0.9424344472008671
J5_190705-T001	J5	05/07/19	5	13	2pm	189	M	d	1844.0494336391127	high	7	0.6688336781353428
J5_190705-T001	J5	05/07/19	5	13	2pm	189	M	d	1856.2242040126187	high	7	0.649885601691949
J5_190705-T001	J5	05/07/19	5	13	2pm	189	M	d	1858.3484738523869	high	7	0.6108673871055998
J5_190705-T001	J5	05/07/19	5	13	2pm	189	M	d	1859.9279684594035	high	7	0.8419332486737403
J5_190705-T001	J5	05/07/19	5	13	2pm	189	M	d	1862.2205189707092	high	7	0.7430861827401714
J5_190705-T001	J5	05/07/19	5	13	2pm	189	M	d	1864.1061711226985	high	7	0.7283046034601739
J5_190705-T001	J5	05/07/19	5	13	2pm	189	M	d	1897.7789926874195	high	7	0.8628076267402776
J5_190705-T001	J5	05/07/19	5	13	2pm	189	M	d	1899.2490857485932	high	7	0.5636082077901392
J5_190705-T001	J5	05/07/19	5	13	2pm	189	M	d	1901.600402453076	high	7	2.080479680607368
J5_190705-T001	J5	05/07/19	5	13	2pm	189	M	c	1947.0944156111852	high	7	0.8280169966299127	318.02157248602725	0.8043116743442079	81.81543791184498	388.7805802301551	0.00013975499835599116	-2.0117419550415803	7.55272789931366
J5_190705-T001	J5	05/07/19	5	13	2pm	189	M	c	1948.5594225505868	high	7	1.2107139278450632	313.6382871105538	0.8157512380671545	125.44746995243031	413.44263641076867	0.000239540858725128	-2.1905525014869403	9.268361722189368
J5_190705-T001	J5	05/07/19	5	13	2pm	189	M	c	1950.4059537067167	high	7	0.7306032323203908	323.8378171054298	0.5875596069348915	118.29796871300276	421.14842324330834	0.00016716230733579505	-2.18527275512769	34.1041088789188
J5_190705-T001	J5	05/07/19	5	13	2pm	189	M	c	1951.6009358445249	high	7	1.2107139278450632	344.32905598884076	0.5832726503727979	150.8177819806807	449.6431965102892	0.00165862975457006	-2.2365790136482597	18.861962066429
J5_190705-T001	J5	05/07/19	5	13	2pm	189	M	c	1953.4828439880096	high	7	0.7723519884527832	332.15016667201513	0.506453238672147	120.535352546439	427.25123600081696	0.000285236158682656	-2.17233707717492	11.0319031130754
J5_190705-T001	J5	05/07/19	5	13	2pm	189	M	c	1954.9947987378328	high	7	0.7723519884530106	384.14572479008683	0.5188922516147572	82.01169961851616	424.48556049328283	0.000241686817246665	-2.1963904917714	24.714116148383102
J5_190705-T001	J5	05/07/19	5	13	2pm	189	M	c	1956.544002479265	high	7	1.0645932813811214	393.30742582534936	0.6847919826225439	112.00110477788587	545.2330032749628	0.0011577176413095191	-2.16154385717449	3.8846189693185895
J5_190705-T001	J5	05/07/19	5	13	2pm	189	M	d	1960.524919252445	high	7	1.0158863992264742
J5_190705-T001	J5	05/07/19	5	13	2pm	189	M	d	1963.6163121430268	high	7	1.2107139278450632
J5_190705-T001	J5	05/07/19	5	13	2pm	189	M	d	1965.5058212360373	high	7	1.036760777292784
J5_190705-T001	J5	05/07/19	5	13	2pm	189	M	d	1970.7993654658967	high	7	0.7045514834712776
J5_190705-T001	J5	05/07/19	5	13	2pm	189	M	d	1972.738867088069	high	7	0.8693250664252901
J5_190705-T001	J5	05/07/19	5	13	2pm	189	M	d	1975.0477922129166	high	7	1.0298026512705292
J5_190705-T001	J5	05/07/19	5	13	2pm	189	M	d	1984.368445270354	high	7	0.6643714757578891
J5_190705-T001	J5	05/07/19	5	13	2pm	189	M	d	2002.9384491693481	high	7	0.7181820709024578
J5_190705-T001	J5	05/07/19	5	13	2pm	189	M	d	2007.293442187088	high	7	0.6471057200551513
J5_190705-T001	J5	05/07/19	5	13	2pm	189	M	d	2016.118026893928	high	7	0.7165543384826378
J5_190705-T001	J5	05/07/19	5	13	2pm	189	M	d	2018.3478978047767	high	7	1.162007045690416
J5_190705-T001	J5	05/07/19	5	13	2pm	189	M	d	2020.5331779020105	high	7	0.910097001412396
J5_190705-T001	J5	05/07/19	5	13	2pm	189	M	d	2022.9638014615966	high	7	1.2173519719744943
J5_190705-T001	J5	05/07/19	5	13	2pm	189	M	d	2028.3178772765025	high	7	0.6534029753729556
J5_190705-T001	J5	05/07/19	5	13	2pm	189	M	d	2030.2700827900574	high	7	0.7311890438697901
J5_190705-T001	J5	05/07/19	5	13	2pm	189	M	c	2032.7352829261015	high	7	1.1667910274516091	314.49988295941057	0.5649891088513271	79.64028566560694	667.5663379798933	0.0005950474184905018	-1.92791569075048	0.4948038094840279
J5_190705-T001	J5	05/07/19	5	13	2pm	189	M	c	2093.8080369013605	high	7	0.9483380755805229	298.1023187622487	0.7896640518103775	105.10548978848317	395.7939754451741	0.000128988705948508	-2.0796592542105	7.724152514467349
J5_190705-T001	J5	05/07/19	5	13	2pm	189	M	c	2098.525020089001	high	7	0.8828718774384471	305.77797096240573	0.7773252649348065	85.60092226337326	349.22421500467277	-8.545421599944836e-06	-2.10114687554825	7.98432436878262
J5_190705-T001	J5	05/07/19	5	13	2pm	189	M	c	2189.027285266037	low	8	0.8768720359403233	382.2912098751462	0.8000229622198672	93.68174824639509	523.1167107879554	1.5166826076460849e-05	-2.03024717108394	4.12323304186286
J5_190705-T001	J5	05/07/19	5	13	2pm	189	M	d	2262.872594353678	low	8	0.7892897112378705
J5_190705-T001	J5	05/07/19	5	13	2pm	189	M	d	2264.779944078694	low	8	1.5774976103416518
J5_190705-T001	J5	05/07/19	5	13	2pm	189	M	d	2269.6810345284885	low	8	0.8150691132291286
J5_190705-T001	J5	05/07/19	5	13	2pm	189	M	d	2273.385844256375	low	8	0.6712770321778407
J5_190705-T001	J5	05/07/19	5	13	2pm	189	M	c	2275.017276950829	low	8	0.7563735309140611	468.00142767702124	0.8377316007079972	50.47688194123578	534.8149285393122	0.0005269893644107922	-2.12895998780996	12.7943548816346
J5_190705-T001	J5	05/07/19	5	13	2pm	189	M	c	2299.5150535625435	low	8	0.6145008755806884	319.39893824135163	0.7300256791001882	20.64674433939382	610.9401690393149	5.4698536484837205e-06	-1.8417867070178797	0.8537091748266679
J5_190705-T001	J5	05/07/19	5	13	2pm	189	M	c	2369.1455761559755	low	8	1.24971526382069	382.83310721104	0.9121462088932464	50.14307424732687	598.173306228448	0.0003073851129661812	-2.0545213101153896	4.07072403209037
J5_190705-T001	J5	05/07/19	5	13	2pm	189	M	c	2382.455637681593	low	8	0.9182990612607682	428.5889327406311	0.7967985069221517	172.42330234895667	661.3138416547955	3.042450049555302e-05	-2.09351419285593	2.7643459776638504
J5_190705-T001	J5	05/07/19	5	13	2pm	189	M	c	2384.800091871452	low	8	0.8837765401603974	439.2073314002423	0.7855219768901436	131.90359398067335	731.4489819874875	7.000620774829244e-05	-2.09153930463916	2.28717310071748
J5_190705-T001	J5	05/07/19	5	13	2pm	189	M	c	2387.6172977998986	low	8	0.9182990612603136	327.83169915350214	0.6663958858914322	49.57669591174829	840.038725592895	4.208700408300123e-05	-1.9280002123651299	0.9292807270376692
J5_190705-T001	J5	05/07/19	5	13	2pm	189	M	c	2389.1965717055355	low	8	1.0218666245605164	310.45211710048443	0.7316837088350591	80.92234403130487	549.0771035646061	2.04432996232914e-06	-1.65622029745197	0.24929998690890598
J5_190705-T001	J5	05/07/19	5	13	2pm	189	M	d	2410.988834140521	low	8	0.7303005000235316
J5_190705-T001	J5	05/07/19	5	13	2pm	189	M	d	2414.603941382439	low	8	0.8876522404066236
J5_190705-T001	J5	05/07/19	5	13	2pm	189	M	c	2417.729180174619	low	8	0.597742460331574	443.5860458003223	0.9782127918501724	19.141208253991465	543.6351963354061	0.0006404790138997815	-2.02531343723042	11.9835852779249
J5_190705-T001	J5	05/07/19	5	13	2pm	189	M	c	2419.7104215358786	low	8	0.6522405992350286	430.940401004176	0.7657336228902292	33.88469209127675	678.6810467531095	0.0007124211974318806	-2.0101324769561497	3.55230074676234
J5_190705-T001	J5	05/07/19	5	13	2pm	189	M	d	2421.7636668643013	low	8	1.504537139137028
J5_190705-T001	J5	05/07/19	5	13	2pm	189	M	d	2424.5268564431844	low	8	0.9293966168074804
J5_190705-T001	J5	05/07/19	5	13	2pm	189	M	d	2428.168887756544	low	8	0.8003242839131417
J5_190705-T001	J5	05/07/19	5	13	2pm	189	M	d	2546.752004100473	silence	9	0.5322351072163656
J5_190705-T001	J5	05/07/19	5	13	2pm	189	M	c	2550.933425245169	silence	9	0.6953555819909525	418.2012875559122	0.7040496569700522	211.56044572679596	606.7702861727449	0.000549621311690471	-1.9760052382249098	6.501651973773379
J5_190705-T001	J5	05/07/19	5	13	2pm	189	M	c	2552.9828993832066	silence	9	0.6341474158125493	448.4025217671856	0.9771171628818246	11.879105365563646	516.7267759681706	0.0008858760461666899	-2.08911614313447	17.6608920418009
J5_190705-T001	J5	05/07/19	5	13	2pm	189	M	c	2562.7727152341336	silence	9	0.9376684148792264	450.49459220432936	0.7019756015879561	28.656044843191072	588.5392810670846	0.0002481258914637628	-2.13628738335183	7.14641395488558
J5_190705-T001	J5	05/07/19	5	13	2pm	189	M	d	2564.607901282171	silence	9	1.1803049020868457
J5_190705-T001	J5	05/07/19	5	13	2pm	189	M	d	2596.568798732619	silence	9	0.8500637175798147
J5_190705-T001	J5	05/07/19	5	13	2pm	189	M	d	2607.085809455425	silence	9	0.5109538056763085
J5_190705-T001	J5	05/07/19	5	13	2pm	189	M	c	2648.6733199641017	silence	9	0.9847669291752936	435.49605571356506	0.8044405793150923	32.411642502341806	585.9641145142258	0.0003476416867615701	-2.09887424783537	8.443638946973799
J5_190705-T001	J5	05/07/19	5	13	2pm	189	M	d	2650.7476618467012	silence	9	0.73264984502066
J5_190705-T001	J5	05/07/19	5	13	2pm	189	M	c	2653.924232940472	silence	9	0.4899165231677216	439.5897386210505	0.520344176449258	14.859581229593687	574.0745301495774	0.0005200993769077225	-1.93047583418136	13.5130532141382
J5_190705-T001	J5	05/07/19	5	13	2pm	189	M	d	2709.7480164918866	silence	9	0.8498970772852772
J5_190705-T001	J5	05/07/19	5	13	2pm	189	M	d	2712.1059670669188	silence	9	0.7750173288168298
J5_190705-T001	J5	05/07/19	5	13	2pm	189	M	d	2713.8352766375438	silence	9	1.0547133819436567
J5_190705-T001	J5	05/07/19	5	13	2pm	189	M	d	2721.704460432763	silence	9	0.9767343620651444
J5_190705-T001	J5	05/07/19	5	13	2pm	189	M	d	2724.483206777835	silence	9	1.4817284571090568
J5_190705-T001	J5	05/07/19	5	13	2pm	189	M	d	2726.8672164345307	silence	9	0.9884446837913856
J5_190705-T001	J5	05/07/19	5	13	2pm	189	M	c	2732.2440029709123	silence	9	0.929875065442502	419.7935304334224	0.8978791272735546	25.940329087730504	448.47237104026186	0.0013546931126639868	-2.13056004748372	75.6951161204878
J5_190706-T001	J5	06/07/19	6	14	2pm	191	M	c	51.28716676913346	silence	1	0.4797091975869776	355.4685305215392	0.998199025296168	14.489151380966295	544.6324837596138	7.133463888123189e-05	-2.08053833280764	12.098360566340899
J5_190706-T001	J5	06/07/19	6	14	2pm	191	M	c	52.53528265946641	silence	1	0.7525314456658876	349.89810003207117	0.9537456993077379	9.397211850557653	507.7768313240435	0.00021155813380087165	-1.9675281910262599	6.31262956615639
J5_190706-T001	J5	06/07/19	6	14	2pm	191	M	c	54.0459818023024	silence	1	0.7822761258670283	322.5879866956213	0.989936446242358	9.897136250481706	462.4352158640092	0.00014284987528900045	-2.0847311447256898	8.02047642299811
J5_190706-T001	J5	06/07/19	6	14	2pm	191	M	c	57.86575876450525	silence	1	0.3718330537285723	353.9048175335054	0.9994430686906196	9.656834593840356	359.1487970767655	1.794624880607089e-05	-1.9503133443998601	468.370134248714
J5_190706-T001	J5	06/07/19	6	14	2pm	191	M	c	59.3880229191399	silence	1	0.593511380503756	443.76535706400904	0.9919012135414637	68.45776812337613	548.2014642758846	0.00011521327393424685	-2.22259991633275	6.204124779596389
J5_190706-T001	J5	06/07/19	6	14	2pm	191	M	c	61.374485004764786	silence	1	0.7607275390036605	349.96715554160215	0.9732614909443376	21.38622706256797	689.0907449688683	0.00011556199939676757	-2.0268005483068	1.6821101842086899
J5_190706-T001	J5	06/07/19	6	14	2pm	191	M	c	64.12237224653606	silence	1	0.8093060241107679	365.0081706190378	0.9667001858282264	15.696521453253979	676.2810225273588	0.0001053667524043315	-2.05518000954981	2.19974386539986
J5_190706-T001	J5	06/07/19	6	14	2pm	191	M	d	75.34294441004863	silence	1	1.670515008013567
J5_190706-T001	J5	06/07/19	6	14	2pm	189	M	d	77.41338429980307	silence	1	0.8516804613272199
J5_190706-T001	J5	06/07/19	6	14	2pm	189	M	d	80.11865659632234	silence	1	0.6512200035836031
J5_190706-T001	J5	06/07/19	6	14	2pm	191	M	d	81.11488405591436	silence	1	0.8991106526734853
J5_190706-T001	J5	06/07/19	6	14	2pm	191	M	c	103.76667474828658	silence	1	0.7819521240640199	363.2770482118256	0.9948099806239492	23.040816129862037	391.0986455613295	0.0003641923773201785	-2.0157904121907197	48.4658990326591
J5_190706-T001	J5	06/07/19	6	14	2pm	191	M	c	106.23434125236072	silence	1	0.4511262254215467	532.3202264771885	0.9860079908907096	17.953869028451773	547.5257690698985	0.00015371662567714551	-2.27137386680396	73.10168376826891
J5_190706-T001	J5	06/07/19	6	14	2pm	189	M	c	106.71589036646259	silence	1	0.574312578306575	431.93091037753817	0.5869008877776775	41.40104389831953	605.0445400671746	0.00024160583051924145	-1.94111759438546	5.862500589672379
J5_190706-T001	J5	06/07/19	6	14	2pm	191	M	c	107.9199663927053	silence	1	0.6614496591530923	324.0894401086989	0.9856276286670432	22.022519388808924	841.5054927837363	0.0005543974743300906	-1.93552181654883	0.9206414242306569
J5_190706-T001	J5	06/07/19	6	14	2pm	189	M	d	108.68962744534296	silence	1	1.0343915603490783
J5_190706-T001	J5	06/07/19	6	14	2pm	189	M	d	111.1053673173576	silence	1	0.549494094900993
J5_190706-T001	J5	06/07/19	6	14	2pm	189	M	d	115.0545727774621	silence	1	0.6469643795037996
J5_190706-T001	J5	06/07/19	6	14	2pm	189	M	c	118.91159215412407	silence	1	0.6616517972849465	471.80880544686636	0.974255893926236	236.54596545029227	576.5438457041604	0.0001689127094065931	-2.28599666607369	9.435080613890412
J5_190706-T001	J5	06/07/19	6	14	2pm	189	M	d	120.22318476073742	silence	1	0.6139203423277024
J5_190706-T001	J5	06/07/19	6	14	2pm	191	M	d	135.10989232183002	silence	1	1.0246470598429769
J5_190706-T001	J5	06/07/19	6	14	2pm	191	M	d	140.57489099520205	silence	1	0.5338327000821721
J5_190706-T001	J5	06/07/19	6	14	2pm	191	M	c	142.43278219240563	silence	1	0.6390954860138721	338.90620194482887	0.8655755583266629	65.95035272780444	604.1548070919742	3.1659899279153595e-05	-2.03044798765143	4.28325523537897
J5_190706-T001	J5	06/07/19	6	14	2pm	191	M	c	144.21282845561683	silence	1	0.6766893381323199	348.37396877572775	0.9561165817484728	19.22851295847039	446.11815993141965	0.00012828275395992207	-2.0296930648061298	16.4229981116154
J5_190706-T001	J5	06/07/19	6	14	2pm	189	M	d	147.91837445310296	silence	1	0.5789453226243211
J5_190706-T001	J5	06/07/19	6	14	2pm	189	M	d	150.73462202316415	silence	1	0.4586449958452477
J5_190706-T001	J5	06/07/19	6	14	2pm	189	M	d	167.09314822910738	silence	1	0.9301494719755964
J5_190706-T001	J5	06/07/19	6	14	2pm	191	M	c	179.16232176125186	silence	1	0.6675190328295741	349.84925631343714	0.9944397022915308	52.836781142387345	424.93165267417766	0.0002293465120282776	-2.0180510116453503	19.2162395182653
J5_190706-T001	J5	06/07/19	6	14	2pm	191	M	c	180.31132993251583	silence	1	0.6511046303829175	338.06345552648014	0.95937437833581	41.328716333002546	433.1072664322118	0.00016377889257379014	-2.00986905388236	11.573748154855199
J5_190706-T001	J5	06/07/19	6	14	2pm	191	M	c	181.84890274545918	silence	1	1.1380652362995818	344.82033751201163	0.998399957993104	20.851946871976796	419.1837188972085	0.000603243227591832	-2.05761753811988	12.658161938763199
J5_190706-T001	J5	06/07/19	6	14	2pm	189	M	d	184.82910135898172	silence	1	0.8043057198847805
J5_190706-T001	J5	06/07/19	6	14	2pm	191	M	d	198.71985838424197	silence	1	0.6182758254896612
J5_190706-T001	J5	06/07/19	6	14	2pm	191	M	c	204.3102296463723	silence	1	0.5408869922425197	472.8336339361078	0.8321229591246697	48.86002640878127	554.2662566892049	8.464152845842703e-05	-2.1962676652845503	9.947490568427881
J5_190706-T001	J5	06/07/19	6	14	2pm	191	M	c	212.68275201793662	silence	1	0.5356595312812544	347.8599639526416	0.9840385228140884	2.4265316703809963	812.6994778364955	0.0001300864414756598	-1.80152757868913	0.791893469436004
J5_190706-T001	J5	06/07/19	6	14	2pm	189	M	d	239.5684207894981	silence	1	0.8043057198848089
J5_190706-T001	J5	06/07/19	6	14	2pm	191	M	d	280.1335233687048	silence	1	0.4377173985767513
J5_190706-T001	J5	06/07/19	6	14	2pm	191	M	d	281.6750253768105	silence	1	0.5034003939762783
J5_190706-T001	J5	06/07/19	6	14	2pm	191	M	c	286.71003822996664	silence	1	0.8271575494653121	295.9383731259823	0.8414597831564722	25.34776499142896	401.60911455763664	0.00016347535628528966	-2.0208408080430202	8.921838918326118
J5_190706-T001	J5	06/07/19	6	14	2pm	191	M	c	304.4653490852582	silence	1	0.4979035408810546	412.96897277951035	0.9815625585237112	20.125405212897423	417.1085406118824	3.768150590235387e-05	-2.06920705787158	2600.50407705934
J5_190706-T001	J5	06/07/19	6	14	2pm	191	M	c	314.06831721919036	silence	1	0.7003478377228021	318.2434185771212	0.971803704608942	23.97136441425965	466.0820980331392	0.00011033269806523519	-2.08262662005698	6.60718794296535
J5_190706-T001	J5	06/07/19	6	14	2pm	189	M	d	340.3316614074062	silence	1	0.6262497834589453
J5_190706-T001	J5	06/07/19	6	14	2pm	189	M	d	342.12942696542666	silence	1	0.8043057198847805
J5_190706-T001	J5	06/07/19	6	14	2pm	191	M	c	345.0726464459552	silence	1	0.5846951294251994	346.9235575136859	0.9262127677778096	24.398971579038292	599.9909102864137	6.402631967827113e-05	-1.9141154739825499	3.68547668000413
J5_190706-T001	J5	06/07/19	6	14	2pm	191	M	c	615.8885892891833	high	2	0.8820831693914215	353.3777195412152	0.9403343424050752	26.195803722601056	416.27481379546214	0.000366867534450398	-1.90903103032959	5.35128653409733
J5_190706-T001	J5	06/07/19	6	14	2pm	189	M	c	870.1064876440465	low	3	1.1950587971564346	487.70697851766283	0.8805986558458215	13.289762723431807	973.8385270072628	0.0007007726305175548	-1.8479754827101498	0.8158656965472479
J5_190706-T001	J5	06/07/19	6	14	2pm	189	M	c	873.1659292433632	low	3	0.9616911884992304	460.1747568820603	0.8515365643996367	32.572360929140636	860.7076806901479	0.00017402723570167792	-1.7872409403743401	1.6519003343121499
J5_190706-T001	J5	06/07/19	6	14	2pm	189	M	d	1030.7549655718854	silence	4	1.8559880166033051
J5_190706-T001	J5	06/07/19	6	14	2pm	189	M	d	1034.2836848039144	silence	4	0.8575658916001885
J5_190706-T001	J5	06/07/19	6	14	2pm	189	M	d	1036.3728912420006	silence	4	0.6421387111015521
J5_190706-T001	J5	06/07/19	6	14	2pm	189	M	d	1109.9517454261218	silence	4	0.6847028184624833
J5_190706-T001	J5	06/07/19	6	14	2pm	189	M	d	1113.882948857264	silence	4	0.7140472249682261
J5_190706-T001	J5	06/07/19	6	14	2pm	189	M	d	1115.975695247295	silence	4	0.6162325366162804
J5_190706-T001	J5	06/07/19	6	14	2pm	189	M	d	1172.5954937636807	silence	4	0.5184163805724893
J5_190706-T001	J5	06/07/19	6	14	2pm	189	M	c	1174.6215459499006	silence	4	0.9258631937159408	402.3410817910314	0.9110932623729938	30.573053931797627	587.1157801097149	0.0003622663649257493	-1.89892418260495	13.042142303083
J5_190706-T001	J5	06/07/19	6	14	2pm	191	M	c	1178.6128887721034	silence	4	0.5379807859349057	347.4106978063501	0.94015665079017	46.89074365694614	388.0572273991281	2.717982030607505e-05	-2.02133982162664	78.00393979623959
J5_190706-T001	J5	06/07/19	6	14	2pm	189	M	d	1200.7169203733185	silence	4	1.317879896804243
J5_190706-T001	J5	06/07/19	6	14	2pm	189	M	d	1204.9869807027526	silence	4	1.5063462006175996
J5_190706-T001	J5	06/07/19	6	14	2pm	189	M	d	1208.0546711682687	silence	4	1.7606643903320671
J5_190706-T001	J5	06/07/19	6	14	2pm	191	M	d	1212.043564225084	silence	4	0.7582116375995156
J5_190706-T001	J5	06/07/19	6	14	2pm	189	M	c	1214.7022794610555	silence	4	0.8575087678841555	416.7515260004406	0.7362203616023258	24.221319810972943	496.43855878935136	0.0006744428919506284	-1.8782900923939299	26.1851138834303
J5_190706-T001	J5	06/07/19	6	14	2pm	189	M	d	1216.8649187641793	silence	4	0.6370937567050987
J5_190706-T001	J5	06/07/19	6	14	2pm	191	M	d	1222.4685802028696	silence	4	0.9278601244245692
J5_190706-T001	J5	06/07/19	6	14	2pm	189	M	d	1223.4656050959095	silence	4	0.7562014701966291
J5_190706-T001	J5	06/07/19	6	14	2pm	191	M	c	1227.2843730480315	silence	4	0.4701458861834453	308.8344778665454	0.9982620358531724	7.448183594287058	408.2655237354844	4.145972041026405e-05	-2.08789362397904	19.519609883209398
J5_190706-T001	J5	06/07/19	6	14	2pm	191	M	c	1235.2888299711349	silence	4	1.0098056217868816	339.65914810437056	0.9602245511077752	39.62092927702082	600.0058649929182	8.515692906828519e-05	-1.9363228126143899	2.6838569205412597
J5_190706-T001	J5	06/07/19	6	14	2pm	191	M	c	1240.5960703376434	silence	4	0.4655968657625635	369.6359369850339	0.9923272844272268	10.9017540317069	431.6275808591145	1.0578811965135233e-05	-1.8311634774964898	239.312422821347
J5_190706-T001	J5	06/07/19	6	14	2pm	191	M	c	1250.2698821866827	low	5	0.35965679680089124	395.8078063868308	0.9291521732344334	26.1847443523036	424.83515095841005	9.011458469049245e-05	-2.01126195103902	521.436449083451
J5_190706-T001	J5	06/07/19	6	14	2pm	191	M	c	1251.8134333230769	low	5	0.8735349654186848	368.4406335576782	0.9687618114437704	38.181026029211004	566.499875617724	7.941965881672339e-05	-1.97672722194324	4.65997009921155
J5_190706-T001	J5	06/07/19	6	14	2pm	191	M	c	1254.5865751236647	low	5	0.51843381951835	376.85842016681124	0.9279596637555338	17.85666777538927	485.4676616352211	3.3687664299830874e-05	-1.8760019388169	108.455572319334
J5_190706-T001	J5	06/07/19	6	14	2pm	191	M	c	1256.0045341015061	low	5	0.6362596875906092	345.0143338420344	0.9522833115613946	15.361273176404438	494.85281008228316	0.000228506958057952	-1.89876259740117	4.86864791964409
J5_190706-T001	J5	06/07/19	6	14	2pm	191	M	c	1257.9325260013236	low	5	0.4490948616996775	361.30872771303217	0.9908788596306388	8.725056869523312	384.66630416817634	0.00010984611452135784	-2.01989154146333	153.437201958867
J5_190706-T001	J5	06/07/19	6	14	2pm	189	M	d	1265.5049169883569	low	5	0.6959967820537258
J5_190706-T001	J5	06/07/19	6	14	2pm	189	M	d	1290.5113907869045	low	5	0.5067378426240339
J5_190706-T001	J5	06/07/19	6	14	2pm	189	M	d	1291.926294739139	low	5	0.8150621192226026
J5_190706-T001	J5	06/07/19	6	14	2pm	189	M	c	1293.8440459550936	low	5	1.0133024654219298	447.9821254416378	0.9505118303650422	44.199047638223476	655.4709421881868	0.00037898529545536057	-1.78515247804375	5.07817815574798
J5_190706-T001	J5	06/07/19	6	14	2pm	189	M	d	1295.862167916717	low	5	0.8012159028919541
J5_190706-T001	J5	06/07/19	6	14	2pm	189	M	c	1347.5945870345286	low	5	0.8218943756069166	420.10353725855737	0.6490093808863846	57.44569168006456	622.8367806530085	0.0003397064833381196	-1.92904806567775	7.0689814016156305
J5_190706-T001	J5	06/07/19	6	14	2pm	189	M	d	1375.028080791726	low	5	0.6172027927400451
J5_190706-T001	J5	06/07/19	6	14	2pm	189	M	d	1377.419597276073	low	5	0.8954765973498979
J5_190706-T001	J5	06/07/19	6	14	2pm	189	M	d	1380.0346206608756	low	5	0.7864587376252529
J5_190706-T001	J5	06/07/19	6	14	2pm	191	M	d	1383.383128171926	low	5	0.4040927220196409
J5_190706-T001	J5	06/07/19	6	14	2pm	191	M	c	1384.5972906328188	low	5	0.9580434516278729	345.3107428052689	0.9608690021980972	26.854930424529012	468.5809674663507	0.00025799612654772805	-1.95313213318998	6.709271433696481
J5_190706-T001	J5	06/07/19	6	14	2pm	189	M	d	1385.644257631976	low	5	0.7375508173795424
J5_190706-T001	J5	06/07/19	6	14	2pm	191	M	c	1391.7819986980453	low	5	1.04360054578342	355.0860826694377	0.9765284029237498	31.1803549617062	623.7282929147044	0.000155186225604434	-1.90624913800852	2.50357985577416
J5_190706-T001	J5	06/07/19	6	14	2pm	191	M	c	1395.9070161200739	low	5	0.6516891265707727	480.87300827685266	0.8767821491295378	238.34555963527214	529.7151865337967	0.000577244358079421	-2.27783757930908	34.4550576040563
J5_190706-T001	J5	06/07/19	6	14	2pm	189	M	d	1399.8392410425436	low	5	0.5870717095579039
J5_190706-T001	J5	06/07/19	6	14	2pm	191	M	c	1400.8740175653077	low	5	0.4657646567186475	320.42470969323705	0.8915365264278556	10.58564203365006	528.8700352386683	8.432994776952536e-05	-2.05709903281208	3.97583050595515
J5_190706-T001	J5	06/07/19	6	14	2pm	189	M	d	1401.6749812924966	low	5	0.9766954502752014
J5_190706-T001	J5	06/07/19	6	14	2pm	189	M	d	1404.3224371113272	low	5	1.0194786734007266
J5_190706-T001	J5	06/07/19	6	14	2pm	189	M	d	1421.1351122378037	low	5	0.9294281332036008
J5_190706-T001	J5	06/07/19	6	14	2pm	189	M	d	1422.9935887782028	low	5	0.94641379798486
J5_190706-T001	J5	06/07/19	6	14	2pm	189	M	d	1425.5202531379598	low	5	0.9377311025903056
J5_190706-T001	J5	06/07/19	6	14	2pm	191	M	c	1428.645179821258	low	5	0.4544712054218962	379.14990550801065	0.9080186716904526	42.214474227277385	377.5278325915898	1.9265429855140123e-05	-2.04386613732957	1545.66320792605
J5_190706-T001	J5	06/07/19	6	14	2pm	191	M	c	1430.1586155785928	low	5	1.256238220072191	336.7631126903343	0.9721452666593504	32.43170888926454	464.47878652217247	0.00020469799395496165	-2.0282360897663	6.05621923255246
J5_190706-T001	J5	06/07/19	6	14	2pm	189	M	d	1434.5392016552719	low	5	0.7338868354217993
J5_190706-T001	J5	06/07/19	6	14	2pm	191	M	c	1591.8727936649884	high	6	1.0292021504380957	354.2658722700661	0.8004896134260627	22.071596304931234	454.393678849568	0.0007400305276001991	-2.01792017121032	4.72442130468221
J5_190706-T001	J5	06/07/19	6	14	2pm	191	M	c	1594.0299256650592	high	6	0.6138203659002102	399.1618436221354	0.8142771088071498	42.904584600934406	890.0437752396268	0.00184132189767494	-1.6601970343449	0.671964628309099
J5_190706-T001	J5	06/07/19	6	14	2pm	191	M	d	1600.5362930988626	high	6	0.7464630223666973
J5_190706-T001	J5	06/07/19	6	14	2pm	191	M	c	1606.004509832191	high	6	0.6638353870325773	340.6705839567152	0.9175274321732348	21.57688137086575	378.07585925689347	0.0006303294563545731	-2.1142526485903503	19.7618927134585
J5_190706-T001	J5	06/07/19	6	14	2pm	189	M	d	1607.680292550584	high	6	0.7667556020762731
J5_190706-T001	J5	06/07/19	6	14	2pm	191	M	c	1611.2050911929773	high	6	1.2607726342866954	346.1133049204913	0.8261301299156353	26.836981133416714	449.3459410908682	0.0007880195776403021	-1.9554440897383703	4.6978954054234405
J5_190706-T001	J5	06/07/19	6	14	2pm	191	M	c	1620.0622366217576	high	6	0.6175212902628573	325.18989611394335	0.3981298394455611	49.476500704444724	363.30819237515726	-1.4239861302637919e-05	-2.14723873634986	14.4553552781547
J5_190706-T001	J5	06/07/19	6	14	2pm	189	M	d	1623.8040761091534	high	6	0.5248930967234173
J5_190706-T001	J5	06/07/19	6	14	2pm	189	M	d	1627.9571636667333	high	6	0.9828880536683756
J5_190706-T001	J5	06/07/19	6	14	2pm	191	M	d	1634.731515924278	high	6	0.8027776773417372
J5_190706-T001	J5	06/07/19	6	14	2pm	189	M	c	1697.8571216279227	high	6	0.5658524255743487	349.9063561637704	0.9163396876981232	22.251736771077447	369.428223502816	0.0018772888594885142	-2.03683204085906	61.236371031279496
J5_190706-T001	J5	06/07/19	6	14	2pm	191	M	c	1703.3010739392907	high	6	0.576305487737045	341.69311770314937	0.8926243238924371	19.98898585393215	561.4617791639648	0.0007267395509185981	-1.93126439131134	1.94202068985897
J5_190706-T001	J5	06/07/19	6	14	2pm	191	M	c	1767.391755639139	high	6	0.414138645219964	334.9704603632769	0.7177823790452543	83.06037040004509	355.0092743434657	4.740394433339599e-05	-1.5509205536429798	26.576991373232797
J5_190706-T001	J5	06/07/19	6	14	2pm	191	M	d	1900.6138133686527	silence	7	0.7491163571871766
J5_190706-T001	J5	06/07/19	6	14	2pm	191	M	d	1902.377687864286	silence	7	0.6844194300413164
J5_190706-T001	J5	06/07/19	6	14	2pm	189	M	d	1995.8378858686624	silence	7	0.9674500214118779
J5_190706-T001	J5	06/07/19	6	14	2pm	189	M	d	1997.9316048109301	silence	7	0.4957323135038223
J5_190706-T001	J5	06/07/19	6	14	2pm	191	M	d	1999.9483785299685	silence	7	0.4271188924319631
J5_190706-T001	J5	06/07/19	6	14	2pm	189	M	d	2000.499001680453	silence	7	0.437410913936219
J5_190706-T001	J5	06/07/19	6	14	2pm	191	M	d	2003.7523601229552	silence	7	0.9468659784029114
J5_190706-T001	J5	06/07/19	6	14	2pm	189	M	c	2005.797747222096	silence	7	0.5403311289801422	428.2425507811355	0.9588169770053452	33.383694679523614	484.5823342533603	0.0009904558526055928	-1.99860204085801	27.779696469970602
J5_190706-T001	J5	06/07/19	6	14	2pm	191	M	c	2007.899826066364	silence	7	0.4940170322104223	362.6443960302932	0.9900505742882364	13.237742777359015	374.14040853025915	1.5275477536441202e-05	-1.9981937779614198	70.4268972331698
J5_190706-T001	J5	06/07/19	6	14	2pm	191	M	c	2018.6475882951559	silence	7	0.6586893762803356	332.78712980511864	0.8561764977583295	137.9001295674305	517.6995872425065	0.00014417532235174246	-2.18808920184789	12.224440805825902
J5_190706-T001	J5	06/07/19	6	14	2pm	191	M	c	2020.52077902238	silence	7	0.6535433655283214	363.6892900891169	0.9427747201082144	85.43180231045379	551.4523449007485	0.00011341331131932697	-1.9190151503805102	4.48005966787562
J5_190706-T001	J5	06/07/19	6	14	2pm	191	M	d	2022.4899904581528	silence	7	0.4322016121063825
J5_190706-T001	J5	06/07/19	6	14	2pm	191	M	d	2027.59364271698	silence	7	0.3705127741577599
J5_190706-T001	J5	06/07/19	6	14	2pm	191	M	c	2029.380778071673	silence	7	0.6947114515455723	358.25540827580187	0.9899594967952854	136.70738390432078	492.46592935086954	0.0001835799770609631	-2.0672675349226	7.90507884990458
J5_190706-T001	J5	06/07/19	6	14	2pm	191	M	c	2038.6813991822687	silence	7	0.5227187830494131	327.52891916158137	0.8453387789477431	14.091794187899039	720.5925195036282	3.359727769897048e-05	-1.9810082306809598	1.78666712130014
J5_190706-T001	J5	06/07/19	6	14	2pm	191	M	c	2040.079458210036	silence	7	0.6226673010150989	353.46367465947924	0.9978499093040284	19.92713930555448	549.5062305506385	0.00012378394530630625	-1.97303449542246	5.30698415738655
J5_190706-T001	J5	06/07/19	6	14	2pm	191	M	d	2042.7176305659423	silence	7	0.6381053332715965
J5_190706-T001	J5	06/07/19	6	14	2pm	191	M	c	2044.7191699837301	silence	7	0.5865140139992491	356.55172149183153	0.9066835466383688	132.92366429906565	860.9574795464513	0.00010924252829783711	-1.93188746498955	0.625761227914334
J5_190706-T001	J5	06/07/19	6	14	2pm	191	M	c	2046.6765108983407	silence	7	0.6638353870325773	356.00507502758364	0.9780355033226272	32.72884822961123	527.5268796808899	0.0001541797086356398	-2.0422459909864097	4.83170192551221
J5_190706-T001	J5	06/07/19	6	14	2pm	191	M	d	2047.8985362771305	silence	7	0.7050034730500556
J5_190706-T001	J5	06/07/19	6	14	2pm	191	M	c	2049.3881970284606	silence	7	0.8851138493769213	307.70216334970894	0.9957144933259724	10.32980059075635	347.0360038570921	0.0002135928683660794	-1.9843983079685301	19.058098257298898
J5_190706-T001	J5	06/07/19	6	14	2pm	191	M	c	2057.5333333731924	silence	7	0.9520119891553804	341.34754460878264	0.9950615099821516	32.104016189699045	460.4220341637189	0.000876976010254377	-2.01306712286007	8.59947779045669
J5_190706-T001	J5	06/07/19	6	14	2pm	191	M	c	2059.692926729145	silence	7	0.9108439031374472	462.5569470703353	0.96992032917662	70.19523416586611	542.734151232907	0.00022846017417387765	-2.28417550306682	11.427863570108302
J5_190706-T001	J5	06/07/19	6	14	2pm	191	M	c	2070.963289664419	silence	7	0.8821039839417608	467.8766275917933	0.997511668012804	16.716900213272652	477.40355468879443	0.00040882293975351165	-2.2215285127685402	59.7546524614849
J5_190706-T001	J5	06/07/19	6	14	2pm	191	M	c	2078.340328938698	silence	7	0.712335102907673	450.4005756127866	0.9981691379972036	19.42124856422231	453.3831961909518	6.46829355417892e-05	-2.1666944949293603	210.898220420555
J5_190706-T001	J5	06/07/19	6	14	2pm	191	M	c	2080.0402451699215	silence	7	0.702441559811632	326.0370575222921	0.9966127793038398	18.25761242994349	371.09909264141993	0.0001548505785615473	-1.99859068115785	22.189177975846
J5_190706-T001	J5	06/07/19	6	14	2pm	189	M	c	2082.254527132062	silence	7	0.8112705338671731	494.20295765762427	0.8554598335792175	53.503055618893306	1021.5956707310623	0.0010142316214150303	-1.84096170678211	0.570782818842189
J5_190706-T001	J5	06/07/19	6	14	2pm	189	M	c	2084.520148501032	silence	7	1.0438212612016289	472.65252247784747	0.8051254241094262	46.372670303338005	919.6896559983933	0.0010763761455292657	-1.9574315848364099	0.781929111888892
J5_190706-T001	J5	06/07/19	6	14	2pm	191	M	c	2088.977900504244	silence	7	1.1179703698412595	345.9776183977126	0.9930584424287632	32.90053537714215	503.3488968703564	0.0002437774599512548	-1.96786396380183	4.811964933196981
J5_190706-T001	J5	06/07/19	6	14	2pm	191	M	c	2093.7921155891254	silence	7	0.3660610945498775	490.2133759456825	0.9930233715028975	15.249594517619586	502.60712909159486	0.00017136633575918545	-2.24776945758656	44.658970653006
J5_190706-T001	J5	06/07/19	6	14	2pm	189	M	c	2094.2242791630724	silence	7	1.276267059376096	449.57071559260453	0.7417921206507819	30.338217911150988	939.7145806704144	0.00016262154480981968	-1.70207438998481	1.75143191626878
J5_190706-T001	J5	06/07/19	6	14	2pm	189	M	d	2097.5665235482234	silence	7	0.4686767166708705
J5_190706-T001	J5	06/07/19	6	14	2pm	189	M	c	2100.541229187757	silence	7	0.6628673874279231	462.45830676867615	0.6952083432648622	16.88853813044949	692.3093101754896	0.00013974512592680396	-1.99294160655379	4.00162466657261
J5_190706-T001	J5	06/07/19	6	14	2pm	189	M	d	2112.135026581122	silence	7	1.0289284819778004
J5_190706-T001	J5	06/07/19	6	14	2pm	191	M	c	2122.040081917288	silence	7	0.8211640769627593	357.99445089110895	0.978505605280618	22.820125635022464	703.7896345992865	9.239959621619e-05	-1.91619909062756	1.89047706077604
J5_190706-T001	J5	06/07/19	6	14	2pm	191	M	d	2123.9771476525993	silence	7	0.4689624234010808
J5_190706-T001	J5	06/07/19	6	14	2pm	191	M	d	2125.7863854082325	silence	7	0.9167720506056868
J5_190706-T001	J5	06/07/19	6	14	2pm	191	M	c	2131.094785097554	silence	7	0.8720827252241179	334.10408365703734	0.9669016042286804	28.721448039839462	550.2457465299225	9.960106240128712e-05	-1.9948493829219198	2.48340937615205
J5_190706-T001	J5	06/07/19	6	14	2pm	191	M	d	2135.739871108741	silence	7	0.7713545716210319
J5_190706-T001	J5	06/07/19	6	14	2pm	191	M	c	2140.0500602965053	silence	7	0.9031755602436532	288.51418967633515	0.5737499833289319	62.945855940019214	452.6863128486935	0.00012236850991768924	-2.12540729957473	3.7294664882432698
J5_190706-T001	J5	06/07/19	6	14	2pm	191	M	d	2142.1842088131684	silence	7	0.8378229553572965
J5_190706-T001	J5	06/07/19	6	14	2pm	189	M	d	2145.915544285554	silence	7	0.4829425668813201
J5_190706-T001	J5	06/07/19	6	14	2pm	189	M	d	2147.802232991307	silence	7	0.5032075117524073
J5_190706-T001	J5	06/07/19	6	14	2pm	189	M	d	2153.798581373293	low	8	0.4856360664985005
J5_190706-T001	J5	06/07/19	6	14	2pm	189	M	d	2155.2034644929167	low	8	1.0783961974570957
J5_190706-T001	J5	06/07/19	6	14	2pm	189	M	c	2157.158839663355	low	8	0.6594679392878788	458.61058773092964	0.9632568434940652	10.925093313560069	765.7704336406014	0.00031746238501682297	-1.81785274449257	2.8818421250766804
J5_190706-T001	J5	06/07/19	6	14	2pm	189	M	d	2158.9077079239014	low	8	1.2346178562347632
J5_190706-T001	J5	06/07/19	6	14	2pm	189	M	d	2161.1165139543227	low	8	0.6243532114704067
J5_190706-T001	J5	06/07/19	6	14	2pm	191	M	d	2162.6089458628776	low	8	0.7293840154593454
J5_190706-T001	J5	06/07/19	6	14	2pm	191	M	c	2164.527786888163	low	8	0.6732775527316335	373.81488443844114	0.9541484860521116	22.17320662803332	1196.6923129593954	0.0019044959990571933	-1.65363672213069	0.17436889211678502
J5_190706-T001	J5	06/07/19	6	14	2pm	191	M	d	2169.334566986001	low	8	1.0772440843707043
J5_190706-T001	J5	06/07/19	6	14	2pm	189	M	d	2174.258255087046	low	8	0.5610646272766644
J5_190706-T001	J5	06/07/19	6	14	2pm	191	M	c	2177.0040063461693	low	8	0.6396136750950063	342.1173106750237	0.9931129883842604	45.646712693370894	407.8612027212297	0.00020171157173877265	-2.1022561850081	19.0682276990837
J5_190706-T001	J5	06/07/19	6	14	2pm	191	M	c	2178.6187545970693	low	8	0.9792214475060064	357.1384088561815	0.9879022466067144	144.48348091776592	857.6592853627992	0.0006983694478625426	-1.97323030294781	1.64113563003611
J5_190706-T001	J5	06/07/19	6	14	2pm	191	M	d	2180.7387963752153	low	8	0.4376304092756982
J5_190706-T001	J5	06/07/19	6	14	2pm	191	M	c	2186.186978749197	low	8	0.7854904781870573	338.4514107679725	0.9274415513660604	54.73027370255539	534.7558741353099	0.00014997636674499065	-2.05982573962295	3.5083183115966405
J5_190706-T001	J5	06/07/19	6	14	2pm	189	M	d	2189.279472201576	low	8	0.8415969409147692
J5_190706-T001	J5	06/07/19	6	14	2pm	191	M	d	2190.4689292114012	low	8	0.6976123190729595
J5_190706-T001	J5	06/07/19	6	14	2pm	189	M	d	2193.3854307019205	low	8	0.6934010821751144
J5_190706-T001	J5	06/07/19	6	14	2pm	189	M	d	2199.089048386106	low	8	0.8736835248923853
J5_190706-T001	J5	06/07/19	6	14	2pm	191	M	d	2201.365852897193	low	8	0.6059497974583792
J5_190706-T001	J5	06/07/19	6	14	2pm	189	M	d	2204.632715269866	low	8	0.678682392124756
J5_190706-T001	J5	06/07/19	6	14	2pm	191	M	d	2205.775163963276	low	8	0.7352392581351523
J5_190706-T001	J5	06/07/19	6	14	2pm	189	M	d	2213.092388815161	low	8	1.1359068055935495
J5_190706-T001	J5	06/07/19	6	14	2pm	189	M	d	2215.2689419553462	low	8	0.8257302437518774
J5_190706-T001	J5	06/07/19	6	14	2pm	191	M	d	2216.5923726199894	low	8	1.0067122149848728
J5_190706-T001	J5	06/07/19	6	14	2pm	191	M	c	2234.954925893649	low	8	0.6481117919224744	314.47199363937017	0.9639733738661904	19.437047183375284	483.2711578498467	3.094073065723055e-05	-1.9541942600623	8.023875658292098
J5_190706-T001	J5	06/07/19	6	14	2pm	191	M	d	2245.1995233349653	low	8	0.927472822063919
J5_190706-T001	J5	06/07/19	6	14	2pm	191	M	c	2255.3472885165647	low	8	0.3238793981813615	349.87923457985664	0.6103660435958563	67.50636196032161	346.2129363321348	8.4574597127962e-06	-1.87604828777868	492.113060033705
J5_190706-T001	J5	06/07/19	6	14	2pm	189	M	c	2259.2950096967347	low	8	0.824420286278837	390.0066009917466	0.6058430908301243	23.962014697909808	577.0043712756745	0.00027748290272543126	-2.03444118137197	4.98139720533595
J5_190706-T001	J5	06/07/19	6	14	2pm	189	M	c	2271.6255002614553	low	8	0.7949767046261513	419.41607921880683	0.6671977573145212	53.713263938237795	532.3208633433665	0.0004842651204808845	-2.0950581131281902	10.661600381028801
J5_190706-T001	J5	06/07/19	6	14	2pm	191	M	d	2274.2233066843633	low	8	0.39012745689979056
J5_190706-T001	J5	06/07/19	6	14	2pm	189	M	d	2274.679682199981	low	8	0.7876158092126389
J5_190706-T001	J5	06/07/19	6	14	2pm	189	M	d	2278.4229174107018	low	8	0.5741498422298719
J5_190706-T001	J5	06/07/19	6	14	2pm	189	M	c	2292.448327851557	low	8	0.846502972518465	480.84286300156714	0.6277794902708139	105.06915647193593	602.1622459394763	0.00019287033290616367	-2.13111423686185	5.86351508417388
J5_190706-T001	J5	06/07/19	6	14	2pm	189	M	c	2296.499947357881	low	8	1.1482996844597435	440.21222911315596	0.7693163902545179	61.804919920196994	589.9633493697513	0.00022891666864450697	-2.0755792678718503	5.568959021073071
J5_190706-T001	J5	06/07/19	6	14	2pm	189	M	c	2320.542540793998	low	8	0.5667889468168141	450.3799548374605	0.7844704641648497	82.73157976119427	562.9616717466398	8.131970264468594e-05	-2.07145576442725	6.56088747949373
J5_190706-T001	J5	06/07/19	6	14	2pm	189	M	c	2322.5220320021954	low	8	0.927472822063919	443.26583623333124	0.560406683244004	45.938798902101716	548.0114081862716	0.00032432460478639725	-2.0878484891160403	8.84479540619532
J5_190706-T001	J5	06/07/19	6	14	2pm	189	M	c	2345.5098086341472	low	8	1.2587131156583382	396.0542998927148	0.8019518859065523	52.62067910118628	602.0557735242777	0.00039714298695366654	-2.0274288031718304	8.41749922160372
J5_190706-T001	J5	06/07/19	6	14	2pm	189	M	c	2362.284549751144	low	8	0.7434504367338377	429.93955075097466	0.931011488986448	29.24972292296144	509.3803207969957	0.0005788568688175251	-2.08784300918926	20.568582066058397
J5_190706-T001	J5	06/07/19	6	14	2pm	189	M	c	2365.474760840325	low	8	0.9495555083035471	475.13272593724645	0.5253870925340294	55.42091875727005	610.8800913432663	0.00023127170906950734	-2.07318938220773	4.1543850035622905
J5_190706-T001	J5	06/07/19	6	14	2pm	189	M	c	2367.384470956586	low	8	1.001081776196315	436.94284302334955	0.645524654632673	50.36563211440579	586.2714071153127	0.00040735830991440883	-2.055446466308	6.410719602268079
J5_190706-T001	J5	06/07/19	6	14	2pm	189	M	c	2371.815618820156	low	8	1.0158035670224308	279.88391811271174	0.819383636972148	168.75335350686078	952.6121729972909	0.0009554250884779164	-1.95517280261399	0.804811124219557
J5_190706-T001	J5	06/07/19	6	14	2pm	189	M	d	2397.8761270436576	low	8	0.5812960256207589
J5_190706-T001	J5	06/07/19	6	14	2pm	189	M	c	2400.3799721034948	low	8	0.8210235137976271	403.593294382799	0.8723035332661949	31.509620630568968	545.0838860309683	0.0006104180880684949	-1.9443426057552902	7.831418421468589
J5_190706-T001	J5	06/07/19	6	14	2pm	189	M	c	2450.8453767404685	high	9	0.5457143975313556	358.44646883655275	0.4983985768354318	91.41994019049936	439.4627128129888	0.0004907317016161529	-2.0703837685732203	12.4020001802789
J5_190706-T001	J5	06/07/19	6	14	2pm	189	M	d	2457.298462852054	high	9	0.9644225952370108
J5_190706-T001	J5	06/07/19	6	14	2pm	189	M	d	2468.5975650169225	high	9	0.7175763357417964
J5_190706-T001	J5	06/07/19	6	14	2pm	189	M	d	2471.763601141967	high	9	1.3212356934814125
J5_190706-T001	J5	06/07/19	6	14	2pm	189	M	c	2475.8138963751458	high	9	0.9716381945431748	370.2941600862648	0.5319179538499104	97.68313615869732	457.19654901508414	0.0005785514552313109	-2.03218291426156	7.02958071130121
J5_190706-T001	J5	06/07/19	6	14	2pm	189	M	d	2478.505002024553	high	9	0.846502972518465
J5_190706-T001	J5	06/07/19	6	14	2pm	189	M	d	2492.0277739924168	high	9	0.8658735932244781
J5_190706-T001	J5	06/07/19	6	14	2pm	189	M	d	2496.7516273952137	high	9	1.7049483970140502
J5_190706-T001	J5	06/07/19	6	14	2pm	189	M	d	2500.051589779021	high	9	0.8940995742459563
J5_190706-T001	J5	06/07/19	6	14	2pm	189	M	d	2502.711632744654	high	9	1.2827307113757342
J5_190706-T001	J5	06/07/19	6	14	2pm	189	M	d	2504.9889091488	high	9	1.4117413776789365
J5_190706-T001	J5	06/07/19	6	14	2pm	189	M	c	2520.717629805373	high	9	0.7287286459072675	365.2518028625714	0.5683064841928591	76.75462453872547	426.7017049620632	0.000268880600122326	-2.09303509613104	6.938040945582089
J5_190706-T001	J5	06/07/19	6	14	2pm	189	M	d	2522.5604297263426	high	9	1.1335778936336285
J5_190706-T001	J5	06/07/19	6	14	2pm	189	M	c	2542.819898492667	high	9	0.7725186709735681	349.5219861420402	0.6827615834646261	85.8839800008792	397.3674439959977	0.0003677439968772649	-2.058963029188	15.4654964846806
J5_190706-T001	J5	06/07/19	6	14	2pm	189	M	d	2544.426773759309	high	9	0.6451954720619142
J5_190706-T001	J5	06/07/19	6	14	2pm	189	M	c	2546.6502590688656	high	9	0.7727341118879849	356.1883312345958	0.7445192661271873	124.6533596423464	470.5121907579908	0.0003860695395659911	-2.05574898501097	3.4390140200726607
J5_190706-T001	J5	06/07/19	6	14	2pm	189	M	c	2549.5685296752717	high	9	0.8852682058522987	355.35863672756767	0.5273804791184896	87.22426252108744	439.0699385791692	0.0005312532686972981	-2.10858282342315	9.290394276163061
J5_190706-T001	J5	06/07/19	6	14	2pm	191	M	c	2552.134006395313	high	9	0.8027432036119535	342.40961486875	0.6440881910140362	70.7203582469985	376.378873079843	0.00024959512887221794	-2.13901276304745	14.3391891225557
J5_190706-T001	J5	06/07/19	6	14	2pm	189	M	c	2554.666547937902	high	9	0.4351318299950435	345.7676608144516	0.6071616395766206	107.23190506196369	421.72608765360945	0.00034154380995026195	-2.0195412900613303	5.817543162461719
J5_190706-T001	J5	06/07/19	6	14	2pm	191	M	d	2555.9437714962473	high	9	1.0653227561952008
J5_190706-T001	J5	06/07/19	6	14	2pm	191	M	c	2560.253563420173	high	9	0.6151863803379456	324.56054130130144	0.6998371556974039	55.59284123297932	363.26473997052733	1.873422389092193e-05	-2.4311086417265897	6.55266424106362
J5_190706-T001	J5	06/07/19	6	14	2pm	191	M	c	2561.548042870545	high	9	0.8327522953354674	344.62697113498376	0.6810061564074642	31.71531139800487	404.16347939086563	0.00025367982503894594	-2.1657716227968504	10.3808522786544
J5_190706-T001	J5	06/07/19	6	14	2pm	189	M	d	2596.864194425446	high	9	0.93778411636913
J5_190706-T001	J5	06/07/19	6	14	2pm	189	M	d	2598.657237655944	high	9	0.7877386577501966
J5_190706-T001	J5	06/07/19	6	14	2pm	189	M	d	2643.845064334865	high	9	0.7131646406464824
J5_190706-T001	J5	06/07/19	6	14	2pm	189	M	d	2646.323139243119	high	9	0.8057798743416242
J5_190706-T001	J5	06/07/19	6	14	2pm	189	M	d	2649.2242675212337	high	9	0.8777659329216476
J5_190706-T001	J5	06/07/19	6	14	2pm	189	M	d	2651.9579073900945	high	9	1.4479386756738677
J5_190706-T001	J5	06/07/19	6	14	2pm	189	M	d	2660.1827968583348	high	9	0.7652318389568791
J5_190706-T001	J5	06/07/19	6	14	2pm	189	M	d	2695.931641838455	high	9	0.5360846517619393
J5_190706-T001	J5	06/07/19	6	14	2pm	189	M	d	2699.7431706046	high	9	0.7012851898953159
J5_190706-T001	J5	06/07/19	6	14	2pm	189	M	d	2708.723838915047	high	9	0.6151863803379456
J5_190706-T001	J5	06/07/19	6	14	2pm	189	M	d	2711.7166049418474	high	9	0.8903717019697979
J5_190706-T001	J5	06/07/19	6	14	2pm	191	M	c	2719.496461530347	high	9	1.1928613960212715	350.6137892700884	0.9127912075707424	63.97663393909364	355.7234531253621	5.7257919738303974e-05	-1.75032834371967	252.512886671654
J5_190706-T001	J5	06/07/19	6	14	2pm	191	M	c	2724.2748081426744	high	9	0.667702290854777	340.5773976584213	0.8266555413333974	26.62478926147475	363.58481234333084	0.000936142166401474	-1.9915794080724298	33.119535094983
J5_190707-T001	J5	07/07/19	7	15	2pm	189	M	c	37.7762152474334	silence	1	0.7269439691177197	452.59287900090465	0.7559544690500908	131.1059290877692	567.4148201369949	0.00038575245546415213	-2.04935050246248	5.20785771085836
J5_190707-T001	J5	07/07/19	7	15	2pm	191	M	d	81.17152923337275	silence	1	0.5765785572468758
J5_190707-T001	J5	07/07/19	7	15	2pm	189	M	d	150.92436579115883	silence	1	0.6499612827146564
J5_190707-T001	J5	07/07/19	7	15	2pm	189	M	d	154.44673661361247	silence	1	0.6289947897238619
J5_190707-T001	J5	07/07/19	7	15	2pm	189	M	d	165.60812461560744	silence	1	0.5235179120712132
J5_190707-T001	J5	07/07/19	7	15	2pm	191	M	c	167.6132017631568	silence	1	0.6867980441515158	358.6900215908973	0.9904552057416178	23.77107222434847	405.36799762516176	0.0007806861055445521	-2.06206442633553	22.2924836304037
J5_190707-T001	J5	07/07/19	7	15	2pm	189	M	d	262.53014663912563	silence	1	0.4437929336479556
J5_190707-T001	J5	07/07/19	7	15	2pm	189	M	d	346.61440994873345	low	2	0.4967400001436317
J5_190707-T001	J5	07/07/19	7	15	2pm	189	M	d	416.0348595048882	low	2	0.6818508407591253
J5_190707-T001	J5	07/07/19	7	15	2pm	189	M	d	496.4269126784272	low	2	0.8823614472250938
J5_190707-T001	J5	07/07/19	7	15	2pm	189	M	d	498.99594661736086	low	2	0.7126854246196785
J5_190707-T001	J5	07/07/19	7	15	2pm	191	M	c	523.7609829908661	low	2	0.6802075066434554	341.39928734121935	0.9936643989190276	15.616663327517983	354.097646483653	0.0007988743519640391	-2.01254263785055	71.6435062827858
J5_190707-T001	J5	07/07/19	7	15	2pm	191	M	c	525.567370873216	low	2	0.9758128093261575	334.0711133976364	0.9827132944417568	16.278441336803667	513.5671881867894	0.0009880571687908	-1.9737305283705402	3.51601205707574
J5_190707-T001	J5	07/07/19	7	15	2pm	189	M	d	531.3368964532407	low	2	0.5334261655792716
J5_190707-T001	J5	07/07/19	7	15	2pm	189	M	d	533.575774925637	low	2	0.6355974988732669
J5_190707-T001	J5	07/07/19	7	15	2pm	189	M	d	542.6359768894637	low	2	0.4993278009609412
J5_190707-T001	J5	07/07/19	7	15	2pm	189	M	d	544.2038955859617	low	2	0.6069591412148156
J5_190707-T001	J5	07/07/19	7	15	2pm	189	M	c	547.4943151101356	low	2	0.6039127157395114	461.1592848287382	0.9082799454945032	129.92335842865663	925.2584586153945	0.00034077037779836183	-1.902672014973	1.0717522760975602
J5_190707-T001	J5	07/07/19	7	15	2pm	189	M	d	549.0890733564186	low	2	0.7176933723280854
J5_190707-T001	J5	07/07/19	7	15	2pm	189	M	c	550.9947119359671	low	2	1.10863203855547	442.70015298973135	0.6423109922249006	49.0353566265722	581.9905258251589	0.0008793567180268262	-2.10838543651304	7.6109078275448505
J5_190707-T001	J5	07/07/19	7	15	2pm	189	M	d	638.7062943047897	high	3	0.8941529302193203
J5_190707-T001	J5	07/07/19	7	15	2pm	189	M	d	642.2759657368015	high	3	1.036699049529716
J5_190707-T001	J5	07/07/19	7	15	2pm	189	M	d	647.5276140048238	high	3	0.9978228351723146
J5_190707-T001	J5	07/07/19	7	15	2pm	189	M	d	652.0754397049271	high	3	0.7904830252664397
J5_190707-T001	J5	07/07/19	7	15	2pm	189	M	d	670.8371867694077	high	3	0.8804575371136707
J5_190707-T001	J5	07/07/19	7	15	2pm	189	M	d	673.2437707041851	high	3	0.6959807198136332
J5_190707-T001	J5	07/07/19	7	15	2pm	189	M	d	675.7661902501695	high	3	0.946581710840178
J5_190707-T001	J5	07/07/19	7	15	2pm	189	M	d	678.055277101962	high	3	0.9942776885181956
J5_190707-T001	J5	07/07/19	7	15	2pm	189	M	d	680.9169384105858	high	3	1.0456425875560171
J5_190707-T001	J5	07/07/19	7	15	2pm	191	M	c	764.1425826357017	high	3	0.5760206534957888	298.32859402990545	0.9880417099191652	49.110578929998375	338.4329373217379	-0.00012044874366345113	13.127540905560801	-26.500852199573497
J5_190707-T001	J5	07/07/19	7	15	2pm	189	M	d	852.017863847217	high	3	0.9208992613212104
J5_190707-T001	J5	07/07/19	7	15	2pm	191	M	c	1050.751847363661	silence	4	0.5607553106094656	394.2348632851799	0.9872805838526671	18.14625347479091	404.8794187560392	1.1752387605168202e-05	-1.94940754126704	959.343273851485
J5_190707-T001	J5	07/07/19	7	15	2pm	191	M	d	1058.5640307079566	silence	4	0.8045177048331881
J5_190707-T001	J5	07/07/19	7	15	2pm	191	M	c	1119.677650503792	silence	4	1.0957057693271963	322.5006820228488	0.9909634948203052	9.541031219139313	819.4222488426648	0.00013082799031832227	-2.0122803653411	1.2762157638590002
J5_190707-T001	J5	07/07/19	7	15	2pm	191	M	c	1129.3016912037895	silence	4	0.4655784343453888	363.8048740117293	0.9824020147735116	5.940582678268412	706.1639586900833	1.3838566837699927e-05	-1.99485559736481	1.79699663517621
J5_190707-T001	J5	07/07/19	7	15	2pm	191	M	c	1203.7479171763225	silence	4	0.5287515705238093	335.20094605713865	0.9947809585978598	29.290349654596408	423.9174102283762	0.00018953255847781316	-2.11841479555325	9.18925948596963
J5_190707-T001	J5	07/07/19	7	15	2pm	191	M	c	1220.3285428771558	high	5	0.5345520873252099	298.79866285615816	0.7267451023700936	66.13125704816537	345.4002080431518	-1.1126971785498942e-05	-3.36278233245996	33.8719237075959
J5_190707-T001	J5	07/07/19	7	15	2pm	189	M	d	1349.0280785998787	high	5	0.7791114040062439
J5_190707-T001	J5	07/07/19	7	15	2pm	191	M	c	1499.5282025185716	high	5	0.4447497398375617	328.19345669860166	0.5737003193081651	38.60101020768025	341.0937108810113	0.00011370317724409201	-2.52838889576874	33.670277591680495
J5_190707-T001	J5	07/07/19	7	15	2pm	191	M	d	1501.9993414048772	high	5	0.36896278865469867
J5_190707-T001	J5	07/07/19	7	15	2pm	191	M	c	1578.179241961389	low	6	1.1040534944461342	343.4654217128237	0.9910062250443146	6.705591215204606	431.18112051682647	9.011223207535411e-05	-1.96967108723738	10.32630153711
J5_190707-T001	J5	07/07/19	7	15	2pm	191	M	c	1626.8480645485274	low	6	0.8739111864570077	372.77292175395485	0.5682247771348289	50.5244026848249	390.4018001764589	5.705135829453879e-05	-2.0553357780838897	68.6079453699269
J5_190707-T001	J5	07/07/19	7	15	2pm	191	M	c	1629.0084935385314	low	6	1.1805173469770125	373.8713227278372	0.9954491799193576	79.96419919914956	508.18354815696864	0.0002533053328026054	-2.13989504508752	10.824518949744501
J5_190707-T001	J5	07/07/19	7	15	2pm	191	M	c	1631.3308757461468	low	6	0.671030913018285	352.665453181892	0.8809055683906463	30.764975416303514	520.6624977233541	0.00020395432345459078	-1.9912246077655	17.365874228152197
J5_190707-T001	J5	07/07/19	7	15	2pm	191	M	c	1633.1656371672516	low	6	0.5094864339585001	376.282890326502	0.7095810396437426	12.048452161756074	389.73303634422854	0.00012601942434898634	-2.0379407533711897	464.93793520663104
J5_190707-T001	J5	07/07/19	7	15	2pm	191	M	c	1656.7992522391985	low	6	0.3894346272102212	379.10362775723513	0.7703103070588364	21.01606906089495	378.53521272990236	3.177347407105274e-05	-2.0044203515801797	1266.51177801555
J5_190707-T001	J5	07/07/19	7	15	2pm	191	M	d	1659.283998806527	low	6	0.7051924330564816
J5_190707-T001	J5	07/07/19	7	15	2pm	191	M	c	1660.8131180511234	low	6	0.8683339660772162	345.74746794597183	0.92487372489621	37.5121240835286	536.1472855146336	0.00023183332275044985	-2.01887760085605	5.33578122820597
J5_190707-T001	J5	07/07/19	7	15	2pm	191	M	c	1664.860388719642	low	6	0.7604500490795091	350.21255571479804	0.9682994771867968	26.217586567156896	466.05968549916594	0.000502347182734794	-1.98519448967765	10.018295286102001
J5_190707-T001	J5	07/07/19	7	15	2pm	191	M	c	1671.406101148013	low	6	1.1087901864395917	322.4878849811429	0.9800614024047896	36.35800054362653	574.6372144288918	8.550346534698212e-05	-2.04849282611483	6.55918828734141
J5_190707-T001	J5	07/07/19	7	15	2pm	191	M	c	1815.8869793859728	low	6	0.5777847339070377	331.59104469853816	0.921206756598766	14.989155374739141	567.191252255116	0.00010752606055084517	-2.06630143142915	4.3412841461075
J5_190707-T001	J5	07/07/19	7	15	2pm	191	M	c	1817.8145532363592	low	6	0.6968393316742549	336.41083065907327	0.9392803880827544	31.97069115456452	500.3374735166723	7.479559546581278e-05	-2.11972200404306	7.58335596956504
J5_190707-T001	J5	07/07/19	7	15	2pm	191	M	c	1838.9088647021754	silence	7	0.6451377688242701	324.57375737677245	0.9899602740100676	19.43205591988294	395.6820358088189	2.2237723327474754e-05	-2.11013569022418	32.0591763640041
J5_190707-T001	J5	07/07/19	7	15	2pm	191	M	d	1850.5930717544452	silence	7	0.8601667486902898
J5_190707-T001	J5	07/07/19	7	15	2pm	189	M	d	1914.7608501066131	silence	7	0.7216998867756956
J5_190707-T001	J5	07/07/19	7	15	2pm	189	M	c	1920.0422012084491	silence	7	0.8200446946675584	402.33323283444946	0.9549250711341598	15.55997146998817	509.2314773666865	0.00040998159758079525	-2.16189132646696	22.520648170826803
J5_190707-T001	J5	07/07/19	7	15	2pm	191	M	c	1939.3574120557464	silence	7	0.5115787679765162	299.0811937547043	0.9864495538796596	7.258600597292002	342.46725417129363	0.0002508409617381052	-2.10902554823083	55.3147166316498
J5_190707-T001	J5	07/07/19	7	15	2pm	191	M	d	2013.6751649045043	silence	7	0.9651551139111234
J5_190707-T001	J5	07/07/19	7	15	2pm	191	M	c	2015.4655017241275	silence	7	0.9835975683172364	365.41079038017756	0.9851837405798052	31.1699090099404	516.195963682247	0.000534280630272076	-2.09669215122291	9.24765994021234
J5_190707-T001	J5	07/07/19	7	15	2pm	191	M	d	2019.4549831027039	silence	7	0.7684356002475852
J5_190707-T001	J5	07/07/19	7	15	2pm	191	M	c	2036.4428005584232	silence	7	0.4979462689605043	318.77795796785136	0.9804709660367629	13.204359600032037	366.668206562762	0.00019192891028527103	-2.12139676312042	22.8996046193544
J5_190707-T001	J5	07/07/19	7	15	2pm	191	M	c	2055.07098323964	silence	7	1.0174087347277236	350.7304383601737	0.9967193102888641	29.626923270529122	519.7112491501368	0.00019777230338515324	-2.16865340415833	17.5908812835776
J5_190707-T001	J5	07/07/19	7	15	2pm	191	M	c	2060.3330760855592	silence	7	0.534831177772503	317.1850770821464	0.962347342799712	30.57520724245421	387.1660016109392	2.2119185988324696e-05	-2.11934590632188	69.5697319478173
J5_190707-T001	J5	07/07/19	7	15	2pm	189	M	d	2130.214873424796	low	8	0.7808087761654859
J5_190707-T001	J5	07/07/19	7	15	2pm	189	M	d	2134.956808959554	low	8	0.6331909346040447
J5_190707-T001	J5	07/07/19	7	15	2pm	189	M	d	2185.383292550882	low	8	1.0051137651239517
J5_190707-T001	J5	07/07/19	7	15	2pm	191	M	c	2196.1073245606563	low	8	1.2602343844059758	356.36529145071717	0.7294220227650284	39.06481986213214	422.58159700898096	0.00013049805071435247	-2.10483076200342	25.327980997934603
J5_190707-T001	J5	07/07/19	7	15	2pm	191	M	d	2202.887793090788	low	8	0.2889317856929665
J5_190707-T001	J5	07/07/19	7	15	2pm	191	M	c	2206.080239043165	low	8	0.3196692097030791	431.465491001156	0.9280655286387284	26.437292349919574	436.51846437218217	0.00017327883535458847	-2.13822084860011	259.745289687827
J5_190707-T001	J5	07/07/19	7	15	2pm	191	M	c	2208.2971482070616	low	8	0.7915657908633875	352.58163691469076	0.6175653603293115	56.02233050812571	419.18286533607386	0.00011268495908229182	-2.08048866043785	19.458588505052898
J5_190707-T001	J5	07/07/19	7	15	2pm	191	M	c	2210.163858044335	low	8	0.6854445554208723	368.8290440648322	0.9671821343713152	15.751903501707034	440.2048299174088	0.00034521896394726316	-2.0781418391412902	15.6719957038096
J5_190707-T001	J5	07/07/19	7	15	2pm	191	M	c	2211.7056222140477	low	8	0.7315506914360412	357.5680371542806	0.9683224171474772	21.28473909288789	427.5252117883584	0.0001781320033469667	-2.05109394300502	20.780087697731698
J5_190707-T001	J5	07/07/19	7	15	2pm	191	M	c	2213.609393141685	low	8	1.2817505812131458	346.6365484849996	0.9427806484504188	67.62201022974547	438.2294998356188	0.0001690563397061175	-2.16429202845852	19.817733184379602
J5_190707-T001	J5	07/07/19	7	15	2pm	191	M	c	2217.0737711780107	low	8	0.6946657826238152	343.1137931283285	0.9563834161104356	60.77357641490488	442.0508685899843	0.00014238810342318402	-2.0651391486711	11.9641561587989
J5_190707-T001	J5	07/07/19	7	15	2pm	191	M	c	2218.4539636293853	low	8	0.7223294642326437	328.20850574379864	0.9919839501386868	23.27905416661241	736.083589426427	0.0006706433950967058	-2.05547948106413	1.69542945456008
J5_190707-T001	J5	07/07/19	7	15	2pm	191	M	c	2219.9482319722947	low	8	0.7899517970545276	287.706317276444	0.9407571029413168	13.499290539949925	467.1660421313977	0.0004552866270073247	-2.1585956665934	8.126118159396558
J5_190707-T001	J5	07/07/19	7	15	2pm	191	M	d	2221.739475795056	low	8	0.6559437072310175
J5_190707-T001	J5	07/07/19	7	15	2pm	191	M	d	2320.582669083649	low	8	0.5225362081682761
J5_190707-T001	J5	07/07/19	7	15	2pm	191	M	d	2329.756757964597	low	8	0.8944590386881828
J5_190707-T001	J5	07/07/19	7	15	2pm	191	M	c	2331.716498038971	low	8	0.4303239361383929	255.3502512838833	0.7177691571278372	171.6534167304075	462.9572457476561	3.0035677956579e-05	-2.1980529494671	56.880529362862
J5_190707-T001	J5	07/07/19	7	15	2pm	191	M	c	2350.4515137969515	low	8	0.5932322833914441	366.4642855212239	0.931718778204698	25.46917598724309	414.58885980984746	3.512901024400449e-05	-2.09045520259383	722.187151742292
J5_190707-T001	J5	07/07/19	7	15	2pm	191	M	c	2352.0352680921865	low	8	0.3596278609161345	393.5575940912747	0.9885449160657978	17.438588777647222	390.9317513782117	6.567850996865119e-05	-2.00579402593345	992.204539442065
J5_190707-T001	J5	07/07/19	7	15	2pm	191	M	d	2426.7085282672892	high	9	0.5686423441829902
J5_190707-T001	J5	07/07/19	7	15	2pm	191	M	c	2439.0091778812803	high	9	0.6239697074011019	326.3446126690593	0.8596274779673879	62.21085755885167	339.1748614813066	8.790935849393392e-05	-1.9548306941378701	29.645536423259802
J5_190707-T001	J5	07/07/19	7	15	2pm	189	M	d	2616.8091276589003	high	9	0.9164246105424354
J3_190625-T001	J3	25/06/19	1	1	6pm	198	F	c	193.352641124818	low	1	0.4040478346390444	277.27025406270343	0.8639171330291083	173.83363970962404	503.23148785051046	2.9686514164477152e-05	-1.9763430568914802	33.5557091007089
J3_190625-T001	J3	25/06/19	1	1	6pm	198	F	d	423.296877616972	low	1	0.4435750334613999
J3_190625-T001	J3	25/06/19	1	1	6pm	198	F	c	796.5956411852937	silence	3	0.3459872381538389	405.14937002994935	0.9966584582680146	11.93697769922261	460.06528486825067	6.123318887747056e-05	-2.06048079933348	40.5865543271034
J3_190625-T001	J3	25/06/19	1	1	6pm	198	F	c	797.4763359733217	silence	3	0.5789799741905881	414.22934915373116	0.9480786539344541	11.739128250812655	696.9307615958708	0.0002293792268365883	-2.0789328085773997	16.8961535349984
J3_190625-T001	J3	25/06/19	1	1	6pm	198	F	c	798.8987827222683	silence	3	0.4563791489787263	418.16134578139327	0.9647624920619771	10.41828225697668	742.332066868717	6.718185999939508e-05	-2.0142732180876	9.526051327791482
J3_190625-T001	J3	25/06/19	1	1	6pm	198	F	c	803.325245113631	silence	3	0.4223566371151719	405.22354689156685	0.9726651601211148	10.034323045906431	592.5008433095609	4.556827792374996e-06	-2.05964234830574	69.7320600263811
J3_190625-T001	J3	25/06/19	1	1	6pm	198	F	c	805.7362694305773	silence	3	0.5678913630847546	430.3073735577675	0.8563422989688845	22.094470936873165	826.5870008649703	6.947324082357704e-05	-2.00121209917382	4.356002823730799
J3_190625-T001	J3	25/06/19	1	1	6pm	198	F	d	807.1103858570312	silence	3	0.4733067691119004
J3_190625-T001	J3	25/06/19	1	1	6pm	198	F	d	837.3484096876037	silence	3	0.3557254842800148
J3_190625-T001	J3	25/06/19	1	1	6pm	198	F	c	1987.7433000052054	low	7	0.9877699057321934	239.52762365144008	0.6724655863022901	90.46522586439607	460.7630104228804	1.2810838478899659e-05	-2.05327332768706	14.509688292462
J3_190625-T001	J3	25/06/19	1	1	6pm	198	F	d	2033.7034519600431	low	7	0.3307269613503649
J3_190625-T001	J3	25/06/19	1	1	6pm	196	M	c	2178.2526691716307	low	7	0.4522974129035902	345.0594586579976	0.8619989026067131	40.73739181506869	466.5478214984849	1.938254691265521e-05	-2.11256370258018	21.1338151911209
J3_190625-T001	J3	25/06/19	1	1	6pm	196	M	c	2179.5037033968524	low	7	0.7363354988551691	447.2489978926056	0.6630647427028139	127.2482549782418	632.0819361866954	0.00020759923335869477	-2.0094123420877703	5.717824661227209
J3_190625-T001	J3	25/06/19	1	1	6pm	196	M	c	2189.469898555347	low	7	0.5038426896994679	250.57198882903785	0.7109966725634483	27.20279664513401	454.4306768660177	1.3857417173081171e-05	-2.26709648719517	15.046923192616301
J3_190625-T001	J3	25/06/19	1	1	6pm	198	F	c	2248.6844268803225	low	7	0.4734860296175611	296.8225993051252	0.8748093764278518	141.9758369618707	442.5411073317522	6.678763888988591e-06	-2.13579628403215	42.62486668730671
J3_190625-T001	J3	25/06/19	1	1	6pm	198	F	c	2252.042768745672	low	7	0.3358951264663119	230.6369201933361	0.8733510759754616	59.051076051964365	398.9021174954239	1.604463776556269e-05	-2.18309453600213	21.6113656383081
J3_190625-T001	J3	25/06/19	1	1	6pm	198	F	d	2626.234683640117	silence	9	0.5955582436531586
J3_190626-T003	J3	26/06/19	2	3	6pm	196	M	c	91.8232700407152	silence	1	0.8204489270681137	352.3080881738001	0.9969541491002316	17.074037495082393	504.1214540320478	0.00012096350592140256	-2.18521072774186	13.2252816113282
J3_190626-T003	J3	26/06/19	2	3	6pm	198	F	c	103.02119358970457	silence	1	0.8117164358549331	391.9271781688468	0.9894159341419424	79.67676051800849	489.30085419219824	9.071962967476025e-06	-2.1862368211479	54.378222399057506
J3_190626-T003	J3	26/06/19	2	3	6pm	198	F	c	106.76259110983759	silence	1	0.4870268396774549	502.6793029754301	0.5446544468425478	26.14920004859107	1071.7320164104476	5.491296604450524e-05	-1.8656932425775599	0.9057520216227729
J3_190626-T003	J3	26/06/19	2	3	6pm	196	M	c	114.59542198382928	silence	1	0.5437678307078501	383.7298746061279	0.7437682944838073	204.742058161696	557.0560692893516	0.0001296619209565286	-2.2523564265874	21.2762453505262
J3_190626-T003	J3	26/06/19	2	3	6pm	196	M	c	138.75798186994294	silence	1	0.7943738744253608	356.96535651967287	0.9701838107640548	68.70689850465294	568.5766642767619	8.783691058213887e-05	-1.9677894461488301	7.587390304841679
J3_190626-T003	J3	26/06/19	2	3	6pm	196	M	c	189.66241194014282	silence	1	0.5225633273392702	356.7620849518006	0.9735490883511092	12.032884746284086	1216.1682323658729	0.0002287485587131538	-1.5991330462812599	0.29946361355092893
J3_190626-T003	J3	26/06/19	2	3	6pm	196	M	c	193.57411794559223	silence	1	0.7750257992677803	352.7052240707586	0.9628157316845324	13.01211394150175	1139.5485625272815	0.00033318428877569215	-1.64633925827221	0.23351206212758702
J3_190626-T003	J3	26/06/19	2	3	6pm	198	F	c	201.83142505692476	silence	1	0.536871525832197	342.1120385430098	0.9567465934081464	31.63996914594816	454.3360109676645	2.8382697621304346e-05	-1.98306269626001	14.369287852432699
J3_190626-T003	J3	26/06/19	2	3	6pm	196	M	d	202.69587920868838	silence	1	0.8553546343767096
J3_190626-T003	J3	26/06/19	2	3	6pm	196	M	c	211.56144566548767	silence	1	0.4822984237582659	281.18398612225405	0.5761359570411176	54.863481828761685	552.5517361682562	5.9457036000281454e-05	-2.02992574325787	14.3039799743277
J3_190626-T003	J3	26/06/19	2	3	6pm	198	F	c	538.3637034766518	high	2	0.6146940694958403	298.83735119399586	0.6223246365320202	81.50452249992907	345.50208750576934	-7.495755572392701e-05	-3.1895432283198	-10.097929175708
J3_190626-T003	J3	26/06/19	2	3	6pm	198	F	c	566.6152242501198	high	2	0.8132875381021449	319.1161917033613	0.3645298583982492	77.2959386206731	362.2734503310324	6.221878318685603e-05	-1.94201201858033	3.0523291796649503
J3_190626-T003	J3	26/06/19	2	3	6pm	198	F	c	584.4953390307039	high	2	0.5579530784654025	368.4053792806352	0.396987794664624	124.3235547132976	490.26545749714063	0.00022850957050963303	-2.17713223605607	7.09970958705294
J3_190626-T003	J3	26/06/19	2	3	6pm	198	F	c	588.5185976470177	high	2	0.4212296224004604	337.2208249133809	0.92930915384813	90.14353205591793	353.05842967165313	2.613051438866103e-05	-2.20185089497403	7.58882737398371
J3_190626-T003	J3	26/06/19	2	3	6pm	196	M	c	894.418471663262	low	3	0.1913943480027456	517.8490792907298	0.9817008439250008	26.26913093877397	535.819024684938	0.00031088727321178575	-2.27602786986919	26.590567924838
J3_190626-T003	J3	26/06/19	2	3	6pm	196	M	d	897.5086828149881	low	3	0.3857644868933221
J3_190626-T003	J3	26/06/19	2	3	6pm	196	M	c	945.6136287834347	silence	4	0.4869225919364908	381.3311563148788	0.6101831069550249	72.30157736577655	761.5080201979921	0.00043256805962655183	-1.94508864753059	2.55926724392533
J3_190626-T003	J3	26/06/19	2	3	6pm	198	F	c	969.967194190808	silence	4	0.3968752632906672	240.125359862035	0.8225725264016059	121.5035142662244	608.9532808813635	0.00012103126745173459	-1.94195985051546	3.6660369541693103
J3_190626-T003	J3	26/06/19	2	3	6pm	198	F	c	1430.858190656991	low	5	0.7044549626086791	410.2212992483902	0.7357847172729615	81.24458698360144	844.9301293330499	0.0005304130972932253	-1.9086472608807399	2.3220516820058195
J3_190626-T003	J3	26/06/19	2	3	6pm	196	M	d	1736.1276205059746	high	6	0.9238982106726326
J3_190627-T002	J3	27/06/19	3	5	6pm	198	F	c	62.92325323881467	silence	1	0.5757355259679713	509.8914407804802	0.6694457237070188	78.47084040772769	540.0205233673671	2.7984679322492642e-05	-2.25146155124365	58.0107798556581
J3_190627-T002	J3	27/06/19	3	5	6pm	198	F	c	97.7147969945152	silence	1	0.7677173963146089	533.1943222717033	0.8831042267235153	44.72573332683447	536.7438893263344	2.1940862319489086e-05	-2.2536497505222	127.853935527064
J3_190627-T002	J3	27/06/19	3	5	6pm	198	F	c	101.94256195049502	silence	1	0.7126656077657856	385.3306682181714	0.9998521216438188	19.62498048433895	436.25049046535037	1.043909322492135e-05	-2.04239459466852	129.460376682778
J3_190627-T002	J3	27/06/19	3	5	6pm	198	F	c	138.77780600822106	silence	1	0.6532768071185728	390.2594447680886	0.9931669077143676	55.446938236168926	436.16462523484716	1.1168844674214793e-05	-2.10346516725106	54.2605997018085
J3_190627-T002	J3	27/06/19	3	5	6pm	198	F	c	193.94971248808048	silence	1	0.5641936061478248	515.490370856593	0.6940890480389451	62.14043976068865	541.5757744815637	9.785847629168232e-06	-2.1552760302996	30.277907311023604
J3_190627-T002	J3	27/06/19	3	5	6pm	198	F	c	219.66159124662647	silence	1	0.9680374505484224	400.10620785987686	0.9922726578917272	21.911276180516037	616.7815271837402	1.3867542488625713e-05	-1.86011391188558	14.353753868814302
J3_190627-T002	J3	27/06/19	3	5	6pm	198	F	d	221.71704011729642	silence	1	0.7877246468517569
J3_190627-T002	J3	27/06/19	3	5	6pm	198	F	c	339.64546752572284	low	2	0.7882429665150426	392.5798258237018	0.9899006682937792	11.242965289348431	418.38340514235136	0.00045601087093812654	-1.9892227960201	105.60730214169399
J3_190627-T002	J3	27/06/19	3	5	6pm	198	F	c	346.4920181405896	low	2	0.6249924547820456	372.54658743741277	0.9984400632009696	33.93405422462689	502.2393097655722	0.0001859451477599799	-1.8151974996959799	8.889839701968961
J3_190627-T002	J3	27/06/19	3	5	6pm	198	F	c	351.05652041386674	low	2	0.4719774758943913	359.50166367849505	0.9574476821296576	17.46911190190201	876.6505369002691	0.00011366281940082486	-1.62370470994011	0.9001475864506521
J3_190627-T002	J3	27/06/19	3	5	6pm	198	F	c	399.2213306901467	low	2	0.8427526323630445	396.0060579946573	0.9700295250444322	103.80919719686622	440.7380173531182	2.590622435723322e-05	-2.16049929568399	241.64544360375
J3_190627-T002	J3	27/06/19	3	5	6pm	198	F	c	403.08851010099966	low	2	0.5411695544636359	340.40496953895644	0.8691591507308286	52.519223081879424	639.1368834055479	7.844437417865336e-05	-2.0035331012601496	3.7549573057546097
J3_190627-T002	J3	27/06/19	3	5	6pm	198	F	c	418.2961291608823	low	2	0.2386934559150973	280.7673997619835	0.6532049097219179	87.47099821805159	471.7773816913201	7.04456357363425e-06	-2.25255460237899	23.8200861140614
J3_190627-T002	J3	27/06/19	3	5	6pm	198	F	c	420.0943624483572	low	2	0.5734799100058012	360.13559862223696	0.9440424735418792	24.39630776133208	541.7011672378344	0.00011332459726319092	-1.83393682552283	3.81745016884562
J3_190627-T002	J3	27/06/19	3	5	6pm	198	F	c	421.2092861635952	low	2	0.6438225084352212	369.07865584342034	0.8972849215327368	91.43309415444958	576.1200647069478	0.00013490979925112438	-2.00388744775306	5.1142536098048605
J3_190627-T002	J3	27/06/19	3	5	6pm	198	F	c	491.5093939328662	low	2	0.5323509631317052	425.3521987033039	0.7009366595066566	132.58551845564986	777.0221963701458	1.704146270898518e-05	-1.8549470518967501	0.544063791911955
J3_190627-T002	J3	27/06/19	3	5	6pm	198	F	c	641.2922374444553	high	3	0.3973162018921812	287.60142362862234	0.6671810692840026	124.05102660830877	336.41165328991	0.00011344649753899905	-1.88140112924745	37.1303685231682
J3_190627-T002	J3	27/06/19	3	5	6pm	198	F	c	652.8723909577263	high	3	0.4130451696614728	313.6513178574055	0.7510504148311368	134.79291854169438	348.66520977288343	-3.805162406788498e-05	-1.44445129017795	-487.36265379027395
J3_190627-T002	J3	27/06/19	3	5	6pm	198	F	c	656.9823954929861	high	3	0.6739579931719389	346.1930503052697	0.6708044476150044	146.88010425378778	369.67183693469315	0.00015979511922817997	-2.0128298994636102	22.098362643076896
J3_190627-T002	J3	27/06/19	3	5	6pm	198	F	c	739.5638793119913	high	3	0.6634273995287003	287.1139361150752	0.5452108859788279	112.72367600033793	357.80008369819876	-1.2174962589130579e-06	-2.9717897911434306	59.9279675225037
J3_190627-T002	J3	27/06/19	3	5	6pm	198	F	c	891.209881369775	high	3	0.5897132440255746	280.846289823887	0.6953674200814974	112.67273245198469	352.11730084013726	1.959087392427002e-05	-1.5513909949500702	9.23544707154525
J3_190627-T002	J3	27/06/19	3	5	6pm	198	F	c	908.8225720048688	high	3	0.3931421626837164	385.3623783191878	0.6495462060579489	117.25668090730049	359.8447819848864	-3.93368873994141e-05	-1.6833695466548002	453.41591466102005
J3_190627-T002	J3	27/06/19	3	5	6pm	198	F	d	953.8952164637112	silence	4	0.389631964802561
J3_190627-T002	J3	27/06/19	3	5	6pm	198	F	c	956.1771695349868	silence	4	0.5826928482632638	391.7901291258093	0.9560132428742024	142.52912708428414	498.33686717655036	3.871079136763446e-05	-2.2017366370772797	36.631140163507105
J3_190627-T002	J3	27/06/19	3	5	6pm	198	F	c	962.0067926810367	silence	4	1.1618754986454858	403.7146755785795	0.9460263473890445	127.2972869433321	590.3529784243717	5.126176636285849e-06	-2.1666037425827103	8.11273781796905
J3_190627-T002	J3	27/06/19	3	5	6pm	198	F	d	965.8012490281143	silence	4	0.7406517529129815
J3_190627-T002	J3	27/06/19	3	5	6pm	198	F	d	986.9179462948633	silence	4	0.9723248130658247
J3_190627-T002	J3	27/06/19	3	5	6pm	198	F	c	1012.3022995089932	silence	4	0.6247398271292468	334.44087961383974	0.9656199826206948	19.967766443310662	418.65412055903687	0.00012892258360963315	-2.0164945687604	18.9712166837953
J3_190627-T002	J3	27/06/19	3	5	6pm	196	M	c	1136.1970652136165	silence	4	0.6328933711490663	250.08171047650916	0.6734356030583865	36.80217141056562	522.0989628186646	5.783760064755915e-05	-1.99613142585118	13.2276053595861
J3_190627-T002	J3	27/06/19	3	5	6pm	196	M	c	1137.8662638397675	silence	4	0.7514554016456714	392.8571978025544	0.5773205928752476	103.94525222970778	560.2192995182168	0.00019301088958973602	-1.94130487121506	9.295841188621608
J3_190627-T002	J3	27/06/19	3	5	6pm	198	F	d	1142.7556037060244	silence	4	0.6459427190077349
J3_190627-T002	J3	27/06/19	3	5	6pm	196	M	c	1153.8399028228507	silence	4	0.7054762780442161	383.52069794703135	0.9252033007840368	20.315148142434	692.8791417201339	7.473904738072241e-05	-2.0549453204758104	5.59390324374104
J3_190627-T002	J3	27/06/19	3	5	6pm	196	M	c	1155.3935867117136	silence	4	0.7242388061602014	383.5475614382782	0.7710878921390147	246.99886638776763	556.9541982133209	0.00011324566119409209	-2.17705890376672	15.0780728572723
J3_190627-T002	J3	27/06/19	3	5	6pm	196	M	d	1164.2190143060232	silence	4	0.6306540564496572
J3_190627-T002	J3	27/06/19	3	5	6pm	196	M	c	1171.4723838328716	silence	4	0.9330283719002636	331.25382031417826	0.8553598050940239	38.94974253190503	482.0420288518248	8.193554458280258e-05	-1.9174111957975302	7.849173554153861
J3_190627-T002	J3	27/06/19	3	5	6pm	196	M	c	1176.9829159750936	silence	4	0.6325014153419488	619.3756516598147	0.8763674907712717	210.31696904062986	675.2115653147938	4.132084841625335e-05	-2.21777232495025	24.525509557874102
J3_190627-T002	J3	27/06/19	3	5	6pm	196	M	c	1181.0009527641425	silence	4	0.578614934684083	367.9530679432489	0.9902044753505286	28.27997627872611	450.15272024180877	0.00027826218634745736	-1.97578590501077	16.9731490399498
J3_190627-T002	J3	27/06/19	3	5	6pm	196	M	d	1194.8845698299199	silence	4	0.653442178476098
J3_190627-T002	J3	27/06/19	3	5	6pm	196	M	c	1197.915657742874	silence	4	0.8445280103330788	365.0511634070269	0.9442763532712	64.37892679497463	639.831229036365	0.0006475522886773424	-1.8507757656736399	5.9275360912660995
J3_190627-T002	J3	27/06/19	3	5	6pm	196	M	d	1201.3233660443266	silence	4	0.7855990235611898
J3_190627-T002	J3	27/06/19	3	5	6pm	196	M	c	1238.994262670827	low	5	0.5576284927249162	268.4980281465846	0.5368965168316918	117.48956607076336	490.42577377655266	6.201644748091269e-06	-2.2375693488715296	24.0001792664465
J3_190627-T002	J3	27/06/19	3	5	6pm	196	M	c	1240.9689062247419	low	5	0.6928650894292332	436.7592835325402	0.6957555124823677	179.83197770568367	775.6042133673665	0.0005342023800499359	-1.93388743629123	2.26646931933068
J3_190627-T002	J3	27/06/19	3	5	6pm	198	F	c	1244.5512798550776	low	5	0.6387580845780576	394.3642833025399	0.7183340029779695	41.78634684265956	395.5310534020266	1.1556631028042888e-05	-1.9662033573543798	199.99257545701698
J3_190627-T002	J3	27/06/19	3	5	6pm	196	M	c	1320.7408744449065	low	5	0.5653376150860367	291.3219175019972	0.629735283027195	233.56534146507016	543.6139344140965	3.267930665971634e-05	-2.2779498487525003	28.6303389681243
J3_190627-T002	J3	27/06/19	3	5	6pm	198	F	c	1635.1951422264472	high	6	0.2569716432210498	285.14260319224525	0.7842650899355561	75.79192419797977	320.1695518384665	0.0001059841413044711	-3.65082765053005	271.805909333148
J3_190627-T002	J3	27/06/19	3	5	6pm	198	F	d	2025.3037764419644	silence	7	0.8187451410451558
J3_190627-T002	J3	27/06/19	3	5	6pm	196	M	c	2328.863325433669	low	8	0.3878266457581958	437.99755298995694	0.7349500971567927	29.70277207166919	705.5748460522066	0.00013056372476596105	-1.9018352774427598	2.44289216858851
J3_190627-T002	J3	27/06/19	3	5	6pm	196	M	d	2330.190554399153	low	8	0.2930245767952329
J3_190627-T002	J3	27/06/19	3	5	6pm	196	M	c	2333.075560371058	low	8	0.5686437193362508	568.1464201068384	0.9231607452037836	85.3943558808046	617.420657289851	0.00023041315252024793	-2.22661848532187	14.940653295020699
J3_190627-T002	J3	27/06/19	3	5	6pm	196	M	c	2354.385876229958	low	8	0.6967224170552981	370.54274024164613	0.5877870237812065	85.74613726978373	789.1307347370091	0.00010676716740120469	-1.7663606673676202	2.79003188942177
J3_190627-T002	J3	27/06/19	3	5	6pm	198	F	c	2368.9162932577333	low	8	0.7506741477318428	323.1853172897305	0.452518992310543	220.18505919694766	462.61172339464434	1.0016554437804719e-05	-2.19210413961429	24.6818769481395
J3_190627-T002	J3	27/06/19	3	5	6pm	198	F	c	2376.360209138068	low	8	0.4839225542946224	259.63437094423097	0.59365884091769	47.70360702781707	488.73255107969175	2.647856325693434e-05	-2.1969227704941203	24.4975723306995
J3_190627-T002	J3	27/06/19	3	5	6pm	198	F	c	2385.710679503057	low	8	0.5145070001308341	385.4046277004551	0.7442466128668251	116.57905360649374	384.35522648288253	9.58590646666931e-06	-2.0418969495351003	300.414919208944
J3_190627-T002	J3	27/06/19	3	5	6pm	198	F	c	2388.0489355626355	low	8	0.9868412953328516	436.8398655864395	0.9889485109167194	70.92966984174205	480.62347688822985	7.471122033876989e-05	-2.2283014751346	113.757586799566
J3_190627-T002	J3	27/06/19	3	5	6pm	198	F	d	2402.8698069659054	low	8	0.8265850166035307
J3_190627-T002	J3	27/06/19	3	5	6pm	198	F	c	2404.683233277841	low	8	1.189270278990989	390.882481987603	0.9367453597276766	11.087788357134798	492.55464440461645	5.1920668977102146e-05	-2.2013989063786097	100.014418071616
J3_190627-T002	J3	27/06/19	3	5	6pm	198	F	c	2409.984181081855	low	8	0.5337395054471017	278.0500309154339	0.772218560377814	29.20016760780743	543.0136556102236	3.6145863590626893e-05	-2.17919519494148	8.69835044269872
J3_190627-T002	J3	27/06/19	3	5	6pm	198	F	c	2411.978994580289	low	8	0.6475612534504762	282.73489496625274	0.4017726913272509	27.344347611222247	602.8651307722872	8.92501634060485e-05	-1.99688037578425	2.4876643768042404
J3_190627-T002	J3	27/06/19	3	5	6pm	196	M	c	2415.0530270118984	low	8	0.5807642170525469	363.573853358185	0.9052371617845952	54.5413950472273	804.5911177242093	0.00015926826468775357	-1.55929130843233	1.24186472063661
J3_190627-T002	J3	27/06/19	3	5	6pm	196	M	c	2416.3688378830348	low	8	0.4017743117974533	489.4609882787378	0.708895504980581	38.63800211844307	1155.9287383862766	0.0017886165075381166	-1.7066574945027102	0.377321734257444
J3_190627-T002	J3	27/06/19	3	5	6pm	196	M	d	2417.423495451503	low	8	0.6277723621833502
J3_190627-T002	J3	27/06/19	3	5	6pm	198	F	c	2419.53408901706	low	8	0.3470065983742643	417.9947546742977	0.5865385426567601	139.76536674097753	542.5440838595455	2.0075113800053772e-05	-2.13895756076889	12.0827870770185
J3_190627-T002	J3	27/06/19	3	5	6pm	198	F	d	2421.3554954924225	low	8	0.5466569078780594
J3_190627-T002	J3	27/06/19	3	5	6pm	196	M	c	2425.510979925521	low	8	0.489257179931883	363.6036441966574	0.939061279046286	60.18454956817096	590.2007246012267	0.00012454624021088087	-1.99425213345698	7.24556654974841
J3_190627-T002	J3	27/06/19	3	5	6pm	198	F	c	2428.5714606273204	high	9	0.4268852062846236	408.9209663123845	0.8554012346453034	22.79570263817317	1398.6620347201754	0.01039421232779624	-1.29539853860722	0.0256716711419647
J3_190627-T002	J3	27/06/19	3	5	6pm	196	M	c	2434.21894794029	high	9	0.5976392887987458	285.4045248341656	0.6342304179795621	95.95857570833664	343.6683443522847	1.2481794355103997e-05	-2.53774666606013	-0.0703055237462553
J3_190627-T002	J3	27/06/19	3	5	6pm	196	M	d	2436.24971836318	high	9	0.4815960794917373
J3_190627-T002	J3	27/06/19	3	5	6pm	198	F	c	2436.927179419673	high	9	0.6880385089530137	330.68258823336413	0.6104499782285033	122.72591195988264	361.76482392533933	1.5427628133578937e-05	-1.6066480767433797	1.86271997486923
J3_190627-T002	J3	27/06/19	3	5	6pm	198	F	c	2440.586434793999	high	9	0.5875949310038777	375.5835567522567	0.9060463591320002	15.311356807606106	1025.0696542307744	0.0022690662093922927	-1.5483943798736297	0.10546390639069801
J3_190627-T002	J3	27/06/19	3	5	6pm	196	M	c	2442.3811806187955	high	9	0.3615968806179808	341.02818941048963	0.7219447839426947	108.49146193920166	358.70987674846435	0.00010837774381002897	-1.89510497119944	11.5748397487786
J3_190627-T002	J3	27/06/19	3	5	6pm	198	F	c	2444.230623631633	high	9	0.34653034392522386	302.8614848146989	0.7560920337981031	54.73392754560257	337.8236682473475	1.240767812821892e-05		100.69877660133301
J3_190627-T002	J3	27/06/19	3	5	6pm	198	F	c	2447.041674802172	high	9	0.4720848163619849	300.29756493516516	0.4520732466044066	143.8504458082221	376.6780716984395	9.269020267302201e-05	-1.92300392177093	32.906111835739495
J3_190627-T002	J3	27/06/19	3	5	6pm	198	F	c	2448.750769508309	high	9	0.6026614676961799	304.5388307432356	0.7544488794397483	83.81832896450737	354.79616783458283	0.00020495326917942497	-2.28161841275324	165.934496516217
J3_190627-T002	J3	27/06/19	3	5	6pm	198	F	c	2450.3679111132933	high	9	0.4118186695923214	268.44428873165765	0.7707743326147166	89.05093929388187	334.53631716996694	6.857807816174305e-05	-2.57971619028956	192.19062206190398
J3_190627-T002	J3	27/06/19	3	5	6pm	198	F	c	2453.024829993983	high	9	0.4570182796696826	269.5790271488611	0.9470876658840486	84.7903429779498	334.81548846637384	0.0002141474562916681	-1.82613309330917	71.8731231568797
J3_190627-T002	J3	27/06/19	3	5	6pm	196	M	d	2453.529149919534	high	9	0.3766634173098282
J3_190627-T002	J3	27/06/19	3	5	6pm	198	F	c	2481.842672816211	high	9	0.5122622475414573	281.91729268578035	0.8139285265194973	112.70960927649021	338.88557190468936	7.244211786354697e-05	-1.9718632243790901	164.039448408199
J3_190627-T002	J3	27/06/19	3	5	6pm	198	F	c	2483.571856237937	high	9	0.5624840365167074	327.07506272905283	0.6793703001520889	116.30445181514013	340.91031771322764	-8.776307432890016e-06	-2.83844280867823	-297.003250092087
J3_190627-T002	J3	27/06/19	3	5	6pm	198	F	c	2488.32960115374	high	9	0.3716412384128489	270.9376649361378	0.826084645716175	102.85494543646344	331.80627593355064	6.620804195612499e-05	-1.64652822744963	59.630130835352794
J3_190627-T002	J3	27/06/19	3	5	6pm	198	F	c	2499.9377802046965	high	9	0.8487482336718131	309.1417558095292	0.6727345470750214	120.56808119330229	350.62359873883577	0.00020433542327766296	-2.19646006988076	79.05587187673541
J3_190627-T002	J3	27/06/19	3	5	6pm	196	M	c	2643.9710908202937	high	9	0.5072400686444779	287.7646580453315	0.6911133139136834	44.999754822651646	414.8626495763879	0.0004112802661032	-2.1846850399672197	13.6356317570276
J3_190627-T002	J3	27/06/19	3	5	6pm	196	M	c	2645.529794236909	high	9	0.6579054355684093	294.7591365863105	0.5465728402630811	107.96291828941341	399.06289722817314	0.00021049700880242691	-2.08949353531009	6.64356640645123
J3_190627-T002	J3	27/06/19	3	5	6pm	198	F	c	2646.258010177042	high	9	0.6026614676961799	364.9377751582997	0.7988574505919848	72.30356731120668	375.64927015138335	0.0007754010330083639	-2.03165957725702	36.6153714858471
J3_190628-T002	J3	28/06/19	4	7	6pm	198	F	d	190.27168287484417	high	1	0.446098994303469
J3_190628-T002	J3	28/06/19	4	7	6pm	196	M	d	190.98544126572966	high	1	0.5480644787156734
J3_190628-T002	J3	28/06/19	4	7	6pm	196	M	d	248.7215866440496	high	1	0.35687919544278657
J3_190628-T002	J3	28/06/19	4	7	6pm	198	F	c	319.9633857102753	high	1	0.7902325041947051	282.2529365217139	0.4077653173800615	72.12104250340212	353.7924575975787	-0.000162386077984293	-2.95728935412668	-29.8920583840485
J3_190628-T002	J3	28/06/19	4	7	6pm	198	F	d	323.95461553141905	high	1	0.5863015353702394
J3_190628-T002	J3	28/06/19	4	7	6pm	198	F	c	328.73252933442495	high	1	0.7774868186431831	374.15029984752573	0.9065345643680686	90.35789036103644	542.5858856004528	0.0002984001314966799	-1.74422136959175	2.8894884429931498
J3_190628-T002	J3	28/06/19	4	7	6pm	198	F	c	332.97081214245986	high	1	0.5990472209218183	280.1695128280312	0.6094144101558715	73.87141263604585	346.60323686875915	-3.348459649355005e-05	-1.8414301134093503	-5.9932698806965705
J3_190628-T002	J3	28/06/19	4	7	6pm	198	F	c	339.23710735696636	low	2	0.6500299631279063	324.3405835595415	0.8597386696592589	39.16046766020753	594.9530183252538	5.903662420709241e-05	-1.97182416488214	2.8689957385453
J3_190628-T002	J3	28/06/19	4	7	6pm	196	M	c	391.02502689996317	low	2	0.5863015353702394	229.10363353397136	0.2795291600110392	21.044152395550555	1254.2461962982554	0.0003947998378325186	-1.7421684133647501	0.621735343204704
J3_190628-T002	J3	28/06/19	4	7	6pm	196	M	c	399.9426156290558	low	2	0.6372842775763843	334.89700876656786	0.5596049474680251	42.76345390386211	1163.9989113098484	0.01389076957276812	-1.7384235222351598	0.193860859701112
J3_190628-T002	J3	28/06/19	4	7	6pm	196	M	d	402.2750760849853	low	2	0.4333533087519754
J3_190628-T002	J3	28/06/19	4	7	6pm	196	M	c	414.8262517603051	low	2	0.5225731076126294	415.5650284565635	0.9809110915096472	12.549676206910535	750.990486643248	0.0005746390990357198	-2.09644737602169	7.865795943140809
J3_190628-T002	J3	28/06/19	4	7	6pm	196	M	d	418.40778940028434	low	2	0.5225731076126294
J3_190628-T002	J3	28/06/19	4	7	6pm	196	M	c	444.72758411854767	low	2	0.8029781897462271	359.7047616757106	0.3545363366963297	43.42938340425633	652.0549530315329	0.00012418813440141758	-2.03919898391064	3.69419984137738
J3_190628-T002	J3	28/06/19	4	7	6pm	196	M	c	448.48622491716833	low	2	0.866706617503894	369.2687120804084	0.8902648607707383	46.46305353049461	471.5239222377565	0.0006575648749264828	-2.08218254696004	14.9785967689091
J3_190628-T002	J3	28/06/19	4	7	6pm	196	M	c	455.3684343200863	low	2	0.4970817365095854	316.5138394096976	0.5549387570700389	13.244089492364312	1377.6583986763287	0.0010084770474465864	-1.45659701781622	0.114575116032739
J3_190628-T002	J3	28/06/19	4	7	6pm	196	M	c	457.17832166840316	low	2	0.5990472209218183	298.6056519087565	0.7980344832005232	91.51041616750223	1015.8328389783536	0.0005580674947237652	-1.8360522382883702	0.317404455129
J3_190628-T002	J3	28/06/19	4	7	6pm	196	M	c	464.1546358315944	low	2	0.6372842775763843	347.3265911269464	0.5033621114674653	125.6831536879597	696.9087294131833	3.577708430211631e-05	-2.08914279789479	121.485137885296
J3_190628-T002	J3	28/06/19	4	7	6pm	196	M	c	466.13021709208124	low	2	0.5608101642671954	377.00912754114154	0.7886389165028215	33.565041235162994	758.3144472002033	0.00015944815465858156	-2.0871020923401398	6.43589937040525
J3_190628-T002	J3	28/06/19	4	7	6pm	196	M	c	469.05233668584503	low	2	0.7265040764370383	337.9965319043091	0.9495649494588724	26.032586679124336	465.82523946408696	0.00025368264626292856	-2.0405047482151697	6.97711059242942
J3_190628-T002	J3	28/06/19	4	7	6pm	196	M	c	471.39994583044717	low	2	0.7265040764370383	353.42207543490264	0.921129961230634	129.8957241353976	572.2489347246539	0.00036244193560374874	-2.03682741677728	7.24891691939422
J3_190628-T002	J3	28/06/19	4	7	6pm	196	M	c	473.41376414758855	low	2	1.1853487562920575	377.7604846306723	0.9838846157922054	45.34063764806905	526.9820103939062	0.0007081603435917917	-1.9620229404865102	16.7723545708137
J3_190628-T002	J3	28/06/19	4	7	6pm	196	M	c	481.11265202514716	low	2	0.6117929064732834	393.5409005412365	0.4657291275932541	92.10398084465568	615.6415604031205	0.00019478973778212764	-2.12947897062712	5.68732762053766
J3_190628-T002	J3	28/06/19	4	7	6pm	196	M	c	482.654879976882	low	2	0.7774868186431831	211.52968276870308	0.6418206951971054	115.74403587565467	725.4759672463379	0.00029835728381151207	-2.0262199311386104	2.0621846105744197
J3_190628-T002	J3	28/06/19	4	7	6pm	196	M	c	489.04451076496565	low	2	0.5353187931641514	374.8135533464454	0.9138350633853531	36.29860489361482	532.5265391531784	0.00046258919938944626	-2.1274520004336	8.492842922490151
J3_190628-T002	J3	28/06/19	4	7	6pm	196	M	c	507.29262604208105	low	2	0.8794523030553592	374.8126422612759	0.5958871011814146	26.462932687874737	1418.8425770642284	0.002331144407943243	-1.43171237939293	0.0955382355295121
J3_190628-T002	J3	28/06/19	4	7	6pm	196	M	c	509.1152590759495	low	2	0.6627756486794283	380.2735766558247	0.9441024103070516	36.86224204719747	511.6285450852452	0.0006117181567506868	-2.04646956119917	16.5374742776748
J3_190628-T002	J3	28/06/19	4	7	6pm	196	M	c	529.0045130713148	low	2	0.8029781897462271	357.7966137348243	0.6789135343783044	60.074914050790476	563.8689831461328	0.0003432738729478406	-2.0406730002350404	6.137481755259321
J3_190628-T002	J3	28/06/19	4	7	6pm	196	M	c	531.8468009493054	low	2	0.5863015353702394	348.8089631578382	0.9758379109809916	31.135566998074236	651.5143437327882	0.00028814856950933407	-2.04107971028151	2.3554322104437797
J3_190628-T002	J3	28/06/19	4	7	6pm	196	M	c	544.4448380848928	low	2	0.6627756486793714	343.98421931095373	0.9413626918719356	26.868093429392104	507.0526751818206	0.00024370607918238377	-2.02664759881832	4.25947629507973
J3_190628-T002	J3	28/06/19	4	7	6pm	196	M	c	560.4620765507539	low	2	0.5098274220611074	460.7890292661088	0.7092246287522629	341.2431897184823	590.6480520098007	0.0001214250559718284	-2.2385091771028702	20.6172842112583
J3_190628-T002	J3	28/06/19	4	7	6pm	196	M	c	569.1043360789954	low	2	0.7774868186430695	253.37509673423486	0.788132663223013	78.2528677096127	833.6919904613609	0.0035251752322087875	-2.11173068021502	2.3747246708022796
J3_190628-T002	J3	28/06/19	4	7	6pm	196	M	c	575.6559213370481	low	2	0.4843360509579498	251.032417177927	0.9309393087242572	145.68102602949008	454.5452574095816	6.043247906322557e-05	-2.1410420906419096	133.42700590188602
J3_190628-T002	J3	28/06/19	4	7	6pm	198	F	c	577.7079767108437	low	2	0.5863015353702394	476.2354316196724	0.6596991305745534	245.12785105423686	1085.562984074105	0.00021200337900374722	-1.7728387713793001	0.320811149365415
J3_190628-T002	J3	28/06/19	4	7	6pm	196	M	c	579.2502046625788	low	2	0.6245385920248054	373.96234807894587	0.9766282675850636	21.052963620367905	464.344963653236	0.0005972261632701958	-1.89567421381249	11.212848392066
J3_190628-T002	J3	28/06/19	4	7	6pm	198	F	d	581.4806996340958	low	2	0.7010127053339374
J3_190628-T002	J3	28/06/19	4	7	6pm	196	M	d	583.7687016328787	low	2	0.5353187931640377
J3_190628-T002	J3	28/06/19	4	7	6pm	196	M	c	588.6298047541218	low	2	0.8157238752977491	364.6007229549698	0.5737747692625912	79.98638951509007	755.4846886792427	0.0003031543773771611	-1.91407514825055	3.5614648150771497
J3_190628-T002	J3	28/06/19	4	7	6pm	196	M	d	590.7073514990204	low	2	0.5863015353702394
J3_190628-T002	J3	28/06/19	4	7	6pm	196	M	c	609.8167156726216	low	2	0.5225731076126294	426.41733557154646	0.9081402768511596	227.12621330271182	580.5437795875135	0.00020162473853537716	-2.0709317099182503	8.5133721070758
J3_190628-T002	J3	28/06/19	4	7	6pm	196	M	c	612.0472106441389	low	2	0.7519954475401391	359.46050838278785	0.8416732018281892	124.57024432577236	475.4858172874136	8.312465764218084e-05	-2.10987363600171	14.320452401123
J3_190628-T002	J3	28/06/19	4	7	6pm	198	F	c	619.2698141147472	low	2	0.7392497619886171	396.3476940768312	0.8175363299055693	65.64742491803418	817.3702808311588	0.000780321384894151	-1.9451345442331	1.7651641031851102
J3_190628-T002	J3	28/06/19	4	7	6pm	198	F	c	624.1577450461731	low	2	0.5990472209218751	355.1235968099444	0.9335852954565677	144.65959826632752	446.98079203666487	0.0002710308913359397	-2.15586693405423	16.5720894426767
J3_190628-T002	J3	28/06/19	4	7	6pm	198	F	c	631.5258178589977	low	2	0.6372842775763274	386.3516566221151	0.5177360663820484	127.00892013091841	436.6041440685386	0.00014542108429018677	-2.14764952987773	234.25222192938702
J3_190628-T002	J3	28/06/19	4	7	6pm	198	F	c	633.4759077483815	low	2	0.6755213342310071	363.8499998202773	0.9711356302354928	17.859689698213803	588.3388310569106	0.00019925323758774124	-2.09766060739713	6.18738310640304
J3_190628-T002	J3	28/06/19	4	7	6pm	198	F	c	639.4535553168787	silence	3	0.5353187931641514	503.79827718195196	0.7363616195657022	30.31243954658737	536.0680758404939	0.00027411022135942855	-2.261393724971	29.790216310195497
J3_190628-T002	J3	28/06/19	4	7	6pm	198	F	c	641.1232401241288	silence	3	0.6755213342310071	435.2477306906645	0.9702288730087928	156.21596146718315	936.9820751071153	0.0006871556497605657	-1.9953621174172398	2.08367419207825
J3_190628-T002	J3	28/06/19	4	7	6pm	198	F	c	644.5506840182786	silence	3	1.2618228696012466	374.73014024708533	0.9820762900391726	31.785533939113122	962.9579720248616	0.0029699102733222894	-1.86820384461532	0.7238403858895079
J3_190628-T002	J3	28/06/19	4	7	6pm	198	F	c	647.0759690811284	silence	3	0.4333533087519754	460.74008356108857	0.8285467214367715	31.49791037413854	571.291701934203	3.0616928009723665e-05	-2.10365425720507	19.2502492755758
J3_190628-T002	J3	28/06/19	4	7	6pm	198	F	c	651.4467846259595	silence	3	1.0578919007767809	408.08045665609154	0.99217418029182	23.508318846703844	624.3058019624643	0.0003678116352945266	-1.94964212835098	3.3289646223243703
J3_190628-T002	J3	28/06/19	4	7	6pm	198	F	c	654.0710594104944	silence	3	0.5480644787156734	303.0123859281657	0.9116529955237296	17.465422484281248	404.7466825894447	0.00017524207286700826	-1.9996436053920201	10.475227717557699
J3_190628-T002	J3	28/06/19	4	7	6pm	198	F	c	656.7082708004492	silence	3	0.6245385920248054	392.912846630676	0.9963421528940508	36.777821879423406	687.9196534771687	0.0010903778236242552	-2.01552207341513	2.8224370037023996
J3_190628-T002	J3	28/06/19	4	7	6pm	196	M	c	657.8043997578808	silence	3	0.6882670197824154	346.5103839484378	0.9373654169948836	31.913330541954227	484.25112460725035	0.0003595762348290721	-2.10898690052537	9.65965174167553
J3_190628-T002	J3	28/06/19	4	7	6pm	198	F	c	658.5563952054208	silence	3	0.8412152464007931	416.4152340951604	0.7513082494071908	199.89804905890912	862.4959639299732	0.0014431327854340895	-2.08661658244568	1.1949946861154
J3_190628-T002	J3	28/06/19	4	7	6pm	198	F	c	661.7830748133414	silence	3	0.7774868186431831	362.5752781822359	0.9501587370997241	8.944090661107397	951.8443936262604	0.006016584113621702	-1.86180959639539	0.47280144499520704
J3_190628-T002	J3	28/06/19	4	7	6pm	196	M	c	662.5605616319847	silence	3	0.5863015353702394	259.79340308423804	0.9943651540268824	20.679469137211868	637.6749572349304	0.00013993701127684884	-1.98427549850484	5.56411309743765
J3_190628-T002	J3	28/06/19	4	7	6pm	198	F	c	664.7426677842852	silence	3	0.5353187931641514	340.42441527942736	0.4958022405248938	25.77203161745757	1170.1960967339935	0.0017327371126722845	-1.7031185547052499	0.292403297427608
J3_190628-T002	J3	28/06/19	4	7	6pm	196	M	c	665.3289693196556	silence	3	0.4078619376489314	366.81693078630235	0.8261170248109094	23.65986787899345	478.9214794359322	0.0003899671860842159	-1.9659500774461498	15.4082433034491
J3_190628-T002	J3	28/06/19	4	7	6pm	196	M	c	667.5206544749128	silence	3	0.4588446798550194	344.09474197494353	0.9862916982737762	23.60984475288103	569.0149806486269	6.441258840423943e-05	-1.8068948157263003	3.82111939696404
J3_190628-T002	J3	28/06/19	4	7	6pm	198	F	c	671.4387677852114	silence	3	0.5863015353702394	291.6054938013749	0.7940494766156398	181.54272151434608	668.7124922098086	2.0105327269211922e-05	-1.9974062885817798	6.747183980656411
J3_190628-T002	J3	28/06/19	4	7	6pm	198	F	c	673.6055343289711	silence	3	0.5735558498187174	372.5073739484272	0.8216853625871321	114.7794062382148	506.5722842008734	1.9422470523996875e-05	-2.21097781186927	16.550740904986
J3_190628-T002	J3	28/06/19	4	7	6pm	198	F	c	674.4594952609235	silence	3	0.6627756486793714	365.1965137100991	0.9339919426469332	145.0758917421075	557.0901258777209	0.0001037900712215596	-1.99470445913405	3.76143510492424
J3_190628-T002	J3	28/06/19	4	7	6pm	196	M	c	687.6262032849174	silence	3	0.7265040764369814	345.6448362744516	0.7976028739572852	19.28026518930983	474.8880425522592	0.0002597116733539881	-2.05278607720884	15.586652831145802
J3_190628-T002	J3	28/06/19	4	7	6pm	196	M	c	689.3468708343736	silence	3	1.0833832718798249	352.617780682578	0.6272302961955364	76.47275568011895	535.6412941889571	0.0003515905637100019	-2.06040994897413	9.064111017742409
J3_190628-T002	J3	28/06/19	4	7	6pm	196	M	c	706.8765336790594	silence	3	0.5480644787156734	469.9742958736193	0.4618185598774225	195.31983799408695	578.4810845230171	5.20187928915444e-06	-2.20044858922673	12.505286295239001
J3_190628-T002	J3	28/06/19	4	7	6pm	196	M	c	756.5276811710754	silence	3	0.6882670197825291	355.37715464391806	0.9623942773065964	51.335340093659674	435.1341140706273	0.0007480668022284633	-2.0325042842698897	25.5977313897716
J3_190628-T002	J3	28/06/19	4	7	6pm	196	M	c	808.4587790178655	silence	3	0.8794523030553592	357.63213283351945	0.972075105847611	26.794650805339533	505.0142942038031	7.354815044101436e-05	-1.9739164134083602	8.44825156117313
J3_190628-T002	J3	28/06/19	4	7	6pm	196	M	c	817.1222177154018	silence	3	0.5863015353702394	349.48559904745065	0.7861351045890768	25.278639338864142	451.2578892487202	0.0001606662573599696	-1.8345911959123302	12.689375210984002
J3_190628-T002	J3	28/06/19	4	7	6pm	196	M	c	870.4333981240891	silence	3	0.7647411330916611	359.3587208759195	0.8393049049813954	9.617405375212172	508.7352862967573	8.935389145825404e-05	-1.9913129247637298	12.5609740687348
J3_190628-T002	J3	28/06/19	4	7	6pm	196	M	d	879.0625301270398	silence	3	0.6500299631279631
J3_190628-T002	J3	28/06/19	4	7	6pm	196	M	c	880.6047580787747	silence	3	0.7265040764370951	391.7348082863553	0.9586339271583414	36.67197094528683	471.05830164733686	0.0021667829862685416	-2.0735570635411102	14.232461187915499
J3_190628-T002	J3	28/06/19	4	7	6pm	196	M	d	943.6279745706116	low	4	1.0837415212149608
J3_190628-T002	J3	28/06/19	4	7	6pm	196	M	c	945.5608331599948	low	4	0.6033200221196466	384.3160057772812	0.8593025842189231	30.066219627394677	1286.2336321842965	0.009097783144945188	-1.5001722763777599	0.0239417266437285
J3_190628-T002	J3	28/06/19	4	7	6pm	196	M	c	946.9560698342012	low	4	0.5474570571086588	415.60692847314345	0.9048514904176188	27.38408665328865	1304.664659406695	0.011727642413587602	-1.46728883728515	0.0295229667816712
J3_190628-T002	J3	28/06/19	4	7	6pm	196	M	c	950.5440787547193	low	4	0.7038733591396067	370.241002132504	0.9304200667340812	23.92747558964402	1107.6779977782578	0.0018391251751263228	-1.7161763745658	0.432781670022414
J3_190628-T002	J3	28/06/19	4	7	6pm	196	M	c	960.3635524869501	low	4	0.7262185451439791	425.9283856588928	0.9091003618565064	28.89037295798562	1356.7320667797428	0.03191127002470148	-1.439834544324	0.0443284387088472
J3_190628-T002	J3	28/06/19	4	7	6pm	196	M	c	966.6173624846674	low	4	0.5809748361151605	358.6165010810704	0.5931025072090037	61.286615666177795	477.3945918133613	0.0008419090917301164	-1.9877342338381099	6.210765352619751
J3_190628-T002	J3	28/06/19	4	7	6pm	196	M	c	971.9031039973706	low	4	0.5027666850996866	377.6021614579165	0.8637567075597152	53.189219117830994	804.3994667507942	0.0006153390821831954	-2.01818757805841	1.2229871472961598
J3_190628-T002	J3	28/06/19	4	7	6pm	198	F	d	973.1544344136188	low	4	0.6061537833218154
J3_190628-T002	J3	28/06/19	4	7	6pm	196	M	d	979.9100080081334	low	4	0.7920008709866124
J3_190628-T002	J3	28/06/19	4	7	6pm	196	M	c	983.6298127523363	low	4	0.6033200221196466	385.02546096410674	0.8184616979551782	25.013848172253915	791.4305108861824	8.026621030291623e-05	-1.85603703260355	2.88721616063437
J3_190628-T002	J3	28/06/19	4	7	6pm	196	M	c	985.3607287607608	low	4	1.1842948582348072	366.28829085084686	0.7508027066164816	44.34458961958535	613.9734165061918	0.0001404274657800706	-1.92993221526032	4.2355920718937305
J3_190628-T002	J3	28/06/19	4	7	6pm	196	M	d	1003.2462478494083	low	4	0.8714622541727977
J3_190628-T002	J3	28/06/19	4	7	6pm	196	M	c	1007.6214556559463	low	4	0.8491170681684252	384.6542382516465	0.9846556827774164	40.33755707471812	485.2500790027827	0.000255474698000027	-1.8766679394563501	26.9627866372941
J3_190628-T002	J3	28/06/19	4	7	6pm	196	M	c	1011.4803836450104	low	4	0.8938074401772838	388.6018024149322	0.9412240285532404	50.10013552282896	803.5358101150964	0.002102883788909043	-2.0472948152571298	1.4053588517236701
J3_190628-T002	J3	28/06/19	4	7	6pm	196	M	c	1114.373396129641	low	4	0.6591829871306345	334.4592914406532	0.917323657504308	33.29737050816959	453.6684578475167	9.17908125243547e-05	-1.96651113771427	9.03116210535391
J3_190701-T002	J3	01/07/19	5	10	6pm	196	M	c	78.93864185533283	silence	1	0.6687332450747192	383.37621183110184	0.7244866829514036	185.9737703125023	536.9389531623281	7.734796846320017e-05	-1.7277444871208798	6.95267662880852
J3_190701-T002	J3	01/07/19	5	10	6pm	198	F	c	83.41270061635052	silence	1	0.3457285951478468	258.08303254117055	0.5934394325550436	22.617818831886353	717.2900832218977	0.00033835611098477714	-2.13400481402273	3.81330488394008
J3_190701-T002	J3	01/07/19	5	10	6pm	196	M	c	111.76087110528736	silence	1	0.8002074995675628	246.9882559048469	0.7782716803957885	125.98978322385797	500.56631892408194	4.428168266324685e-05	-1.73405006058277	4.6596069996429295
J3_190701-T002	J3	01/07/19	5	10	6pm	198	F	d	124.6620681931016	silence	1	0.5254935869893558
J3_190701-T002	J3	01/07/19	5	10	6pm	196	M	c	289.2125815624816	silence	1	0.9368527544160656	339.0131989350545	0.7711404120835529	99.16205750940435	588.8511648647888	0.00023359818416132593	-2.1697106969709	8.219286474644651
J3_190701-T002	J3	01/07/19	5	10	6pm	196	M	d	440.608149095904	low	2	0.4921996423212818
J3_190701-T002	J3	01/07/19	5	10	6pm	196	M	c	533.7986126336417	low	2	0.9136192181025536	362.59790059618615	0.9501708516108528	64.34971736035243	491.8112637814677	0.0007289836007191519	-2.07567987193189	13.9601270678402
J3_190701-T002	J3	01/07/19	5	10	6pm	196	M	c	560.4913877822967	low	2	0.5521568128625631	276.29969844363075	0.8750261581615917	53.755369036618326	512.9873110143552	0.000249185878741847	-2.22707068396641	51.69373130711921
J3_190701-T002	J3	01/07/19	5	10	6pm	196	M	c	564.5420377811894	low	2	0.5940756349100411	328.9079096227793	0.8931742473072278	46.27126681985777	564.6091684278573	0.0004799748761698101	-2.16202604621156	12.364752335578599
J3_190701-T002	J3	01/07/19	5	10	6pm	196	M	c	566.4452128597088	low	2	0.7693766419326948	326.6652879035355	0.6566348043596895	25.65951905908161	519.0643632567646	0.0011958351373791204	-2.12375407419386	16.591396699896702
J3_190701-T002	J3	01/07/19	5	10	6pm	196	M	c	582.8145666192286	low	2	0.8780037678887993	352.88158132437843	0.8922423781605372	63.06460026894529	455.05229127784736	0.0006911030713067862	-2.02755111252504	24.958748636623998
J3_190706-T002	J3	06/07/19	6	15	6pm	198	F	c	727.7471119537465	high	3	0.5930994220937009	310.3318183988925	0.8136477555775945	83.09302452639741	363.8148596925808	5.624162231516799e-05	-2.3951449008807404	17.8996098602403
J3_190706-T002	J3	06/07/19	6	15	6pm	198	F	d	731.5963805480899	high	3	0.4620851380574322
J3_190706-T002	J3	06/07/19	6	15	6pm	198	F	d	736.2237953614772	high	3	0.5535137482614799
J3_190706-T002	J3	06/07/19	6	15	6pm	198	F	c	740.5744306801149	high	3	0.9389965372291726	302.0172021122382	0.6209854969138517	67.23350850154873	364.66509878618064	5.4140671649226084e-05	-2.10414241177177	5.05167290299388
J3_190706-T002	J3	06/07/19	6	15	6pm	198	F	c	776.2394708317372	high	3	0.6249259046368252	329.7319605495533	0.6672490252293678	80.18868970297649	341.29428121958637	4.205837988256809e-05	-2.27900735298207	0.9312913862609159
J3_190706-T002	J3	06/07/19	6	15	6pm	198	F	c	779.7272065770495	high	3	0.5115763104951156	321.07636102147524	0.6121235057517507	59.199775898081036	365.00929259916086	4.6467798440749945e-05	-2.5759642311748197	3.2519677901252697
J3_190706-T002	J3	06/07/19	6	15	6pm	198	F	c	785.8751506140449	high	3	0.6677290487900791	293.9559620340948	0.5489370968261396	110.05225629976816	351.268396650433	-7.6037108143726e-05	-2.6786657255269	-6.04802782111821
J3_190706-T002	J3	06/07/19	6	15	6pm	198	F	d	790.100446099921	high	3	0.34242515322569034
J3_190706-T002	J3	06/07/19	6	15	6pm	198	F	c	791.2569485707857	high	3	0.7190928217738701	322.06485565492517	0.7455723173416486	15.30478539169212	756.8572148044583	0.001200111811295122	-1.89366360824749	0.683370723288974
J3_190706-T002	J3	06/07/19	6	15	6pm	198	F	c	992.5988659546257	silence	4	1.1585384350801178	326.3595773899688	0.9508148604913474	25.238543829659985	772.9747024819649	5.925346405104126e-05	-1.94966462273153	2.0373528699598102
J3_190706-T002	J3	06/07/19	6	15	6pm	198	F	d	1001.1413238380968	silence	4	0.6449007052416391
J3_190706-T002	J3	06/07/19	6	15	6pm	198	F	c	1002.7279700800937	silence	4	0.6877038493948929	364.44776917620004	0.9517307145258536	13.324142912847206	722.3525525552403	1.607287159938224e-05	-2.07539252678386	10.5530112841166
J3_190706-T002	J3	06/07/19	6	15	6pm	198	F	c	1005.1883540003444	silence	4	0.6391936193546144	356.74986797076974	0.9790326457177836	17.845973063876613	629.6872240986497	1.0618984139257135e-05	-2.0456524709670703	6.590158546858929
J3_190706-T002	J3	06/07/19	6	15	6pm	198	F	c	1006.9062531710837	silence	4	0.9287062541854992	372.6042845525228	0.9653465032648506	9.784753871011844	508.24933701534417	5.517956600093237e-06	-2.1354472166422798	24.5655555369514
J3_190706-T002	J3	06/07/19	6	15	6pm	198	F	c	1041.3522839693746	silence	4	0.8275274536285906	375.0706698455238	0.9884923714024696	19.14168908130597	707.4183252774702	3.773990770261593e-05	-2.06008349826589	2.8269062047150695
J3_190706-T002	J3	06/07/19	6	15	6pm	198	F	c	1095.2787692530962	silence	4	0.8580437280277238	333.8013013702397	0.7575557960902161	6.004491220139244	601.023187707388	3.5377710891383016e-05	-2.09942100349529	6.13382958066497
J3_190706-T002	J3	06/07/19	6	15	6pm	196	M	c	1390.4141209552038	high	5	0.9369266073676954	289.9076621313674	0.469504624311517	71.22426538316357	341.604768817886	5.324292539569302e-05	-1.6279169640547202	-5.2288793337911
J3_190706-T002	J3	06/07/19	6	15	6pm	196	M	c	1395.7460114344688	high	5	0.4812784092557649	310.31568245098856	0.4688147415528043	79.31452276725821	330.9862238497057	-0.00012131821814048797		-623.723778765058
J3_190706-T002	J3	06/07/19	6	15	6pm	196	M	c	1398.0689156743535	high	5	0.5296910303052299	283.33439674992246	0.9889646006393829	59.74869086938014	352.8683720849318	5.1964081052542e-05	-2.12905479254974	105.496159988468
J3_190706-T002	J3	06/07/19	6	15	6pm	196	M	c	1401.0618945648441	high	5	1.1448160977563475	308.0616557808544	0.6129104141923448	94.11561994130636	338.89052896059064	2.912520283662192e-05	-1.5325504256329	8.7672961108932
J3_190706-T002	J3	06/07/19	6	15	6pm	196	M	c	1422.5642518159707	high	5	1.4039660104322138	293.00338919286514	0.6127172764831521	76.4649008621598	367.82971134434695	0.0005153035936575209	-2.0405015015315904	60.18897301845039
J3_190706-T002	J3	06/07/19	6	15	6pm	196	M	c	1577.2747366857584	low	6	0.32847564984103883	222.4399559762832	0.7484541880548454	38.16692180615581	352.59939164678445	4.294901252535761e-05	-2.12473008100072	22.5416271214258
J3_190706-T002	J3	06/07/19	6	15	6pm	196	M	c	1580.029553467543	low	6	1.2615369160569117	271.82173741397827	0.653062528156801	49.44358368983899	423.681542677906	6.566765174056762e-05	-2.18184818043488	8.604712099357341
J3_190706-T002	J3	06/07/19	6	15	6pm	196	M	c	1582.924946303361	low	6	1.347226216015315	272.54500941023565	0.6895533076417713	87.06932846990294	606.7705576425151	0.0001724755919869325	-2.16284662169262	4.5030085788167105
J3_190706-T002	J3	06/07/19	6	15	6pm	196	M	d	1590.7217881382412	low	6	0.9568638495372852
J3_190707-T002	J3	07/07/19	7	16	6pm	196	M	d	126.55679193375248	silence	1	0.469412398722767
J3_190707-T002	J3	07/07/19	7	16	6pm	196	M	c	166.83855631738768	silence	1	0.5183095235897213	347.13303439032904	0.9771242441417068	6.661485851561282	305.948551373908	6.3662450138338e-06	-1.8888876648633102	50.7621273878102
J3_190707-T002	J3	07/07/19	7	16	6pm	196	M	d	168.28591121344957	silence	1	1.1930898467536792
J3_190707-T002	J3	07/07/19	7	16	6pm	196	M	c	170.7760504108238	silence	1	0.7627951479244928	324.81626076206044	0.9488516761228192	29.924402797559594	401.63563016282217	7.423071985906411e-05	-2.05919783833388	20.769493578837398
J3_190707-T002	J3	07/07/19	7	16	6pm	196	M	c	193.58684984491632	silence	1	1.1539721468601272	228.93021630423584	0.6627331132303476	125.847451062952	419.0590688114953	0.0001524232599438197	-2.0489537782415397	21.3812261517475
J3_190707-T002	J3	07/07/19	7	16	6pm	196	M	c	213.1763358428452	silence	1	1.3495606463279444	293.6378228874985	0.7268090292149394	90.40945282066501	449.5651248377378	0.00028266422844044984	-2.0975499868663303	13.207963799276301
J3_190707-T002	J3	07/07/19	7	16	6pm	196	M	c	218.21795386068473	silence	1	1.1539721468601272	209.81135623018864	0.9578571911674968	14.428010559223992	370.117407319779	0.00013737941964116944	-2.0226153140515803	35.2735205552017
J3_190707-T002	J3	07/07/19	7	16	6pm	196	M	c	224.91950616050892	silence	1	0.8312511227382231	254.14619718538032	0.8144637159684462	203.4389140342107	490.74273810849985	0.00012085191498331921	-2.2237414238969198	83.4670427776694
J3_190707-T002	J3	07/07/19	7	16	6pm	196	M	c	226.748258630533	silence	1	0.9388247974455056	391.9405583771789	0.9763927293583324	36.70864590791507	674.7339068502632	0.0003176252848740287	-1.8727194882883302	3.10609057302504
J3_190707-T002	J3	07/07/19	7	16	6pm	196	M	c	235.29602983563103	silence	1	0.5670957190666002	295.30173928796637	0.8267248506011095	29.8330294059906	514.1917175675878	7.413568651158119e-05	-2.07022846998628	4.947461748914059
J3_190707-T002	J3	07/07/19	7	16	6pm	196	M	c	237.56702723006276	silence	1	0.8018196766992958	231.44687248321378	0.4554406425221783	26.6499102074028	396.7217166758592	0.00025719047641991857	-1.98202800673147	22.8186654801737
J3_190707-T002	J3	07/07/19	7	16	6pm	196	M	c	248.10662974682631	silence	1	0.8477050991446333	211.32482798405263	0.8242015528423349	29.789752890541987	387.95504850653776	0.00026486920699735837	-2.02173927302893	26.8656027032675
J3_190707-T002	J3	07/07/19	7	16	6pm	196	M	c	251.14324831664646	silence	1	0.5808349753398261	389.2197845152172	0.4484942908094212	30.041718120343948	577.9332950460321	0.00012878615939653472	-1.9838753939796998	3.6084716978962406
J3_190707-T002	J3	07/07/19	7	16	6pm	198	F	c	255.65092614045926	silence	1	0.6907226733771097	377.1973839239276	0.5616471407101062	139.88543960901458	511.00328774858536	4.2586076119777724e-06	-2.2087735281501	25.741708492367703
J3_190707-T002	J3	07/07/19	7	16	6pm	198	F	c	286.3427983179935	silence	1	0.6122314604933194	379.7069834948909	0.9467264360414964	4.050229065618282	470.70271453058416	3.13447225719089e-05	-2.12775280387672	15.396204857944
J3_190707-T002	J3	07/07/19	7	16	6pm	196	M	c	389.21552103068353	high	2	0.5965332179165443	288.4690477608898	0.7427810339875582	43.146289890624026	307.33186335113163	0.00026541619940818114	-1.7773709727273999	10.0008237703155
J3_190707-T002	J3	07/07/19	7	16	6pm	196	M	c	400.9458337935794	high	2	0.4630981560141549	294.1419749629923	0.8777224747662914	96.60316649528124	358.03971225928177	9.470433061750899e-05	-2.07122110978067	11.477219652991199
J3_190707-T002	J3	07/07/19	7	16	6pm	196	M	c	405.7217544056634	high	2	0.7378174011073497	257.48481394017244	0.7828312136254109	105.68633230987223	475.414580502815	0.0004982157557294341	-2.19618208587107	5.24960671233745
J3_190707-T002	J3	07/07/19	7	16	6pm	196	M	c	408.0529434283111	high	2	0.4533425562999582	301.8288276411377	0.5601952166350703	75.8843620525338	353.2549452387741	0.00022187987653999805	-2.01071877021419	23.6366676603392
J3_190707-T002	J3	07/07/19	7	16	6pm	196	M	d	410.61525931879913	high	2	0.5886840966281852
J3_190707-T002	J3	07/07/19	7	16	6pm	196	M	c	415.81274470634423	high	2	0.6907226733771381	285.4248227077462	0.8127085746940846	83.82816602460376	348.1619057961821	-2.915031356091305e-05	-2.55379537316833	-3.97638457055721
J3_190707-T002	J3	07/07/19	7	16	6pm	196	M	c	420.63522623219916	high	2	0.7299682798189338	277.71732537319315	0.8676177285144379	44.621208851850604	312.2479771282229	0.00013662423017302703	-1.6340375722615201	0.628112254430695
J3_190707-T002	J3	07/07/19	7	16	6pm	196	M	c	422.38558027950717	high	2	0.8006103714143933	283.512719188834	0.718340231212104	73.24358011254898	343.18396159629816	0.0001736386317273559	-1.8876759609466898	10.669755404075401
J3_190707-T002	J3	07/07/19	7	16	6pm	196	M	c	424.9497263892839	high	2	0.8869507055865142	283.9118203608202	0.7887923772973513	55.75226478261982	391.42220632498885	6.347310290568406e-05	-1.9411215845482501	6.9578531426628105
J3_190707-T002	J3	07/07/19	7	16	6pm	196	M	c	432.336887838875	high	2	0.5258911263211985	279.65354831579657	0.5126194666572095	43.62642383732082	339.2392005702668	-9.6461724986658e-05	-6.880807435512849	-64.7916405976455
J3_190707-T002	J3	07/07/19	7	16	6pm	196	M	c	435.26956135352026	high	2	0.6436279456468696	290.6890682912287	0.9057727724151082	66.5376128093497	331.5539161789979	0.00018683232303882405	-1.9633381218362	23.2141630848197
J3_190707-T002	J3	07/07/19	7	16	6pm	196	M	c	444.2777542120908	high	2	0.6122314604933763	298.1734047602087	0.8168954243671909	51.13180024201256	358.712699715876	0.00017583651868626512	-2.0223444621527498	6.96226556719435
J3_190707-T002	J3	07/07/19	7	16	6pm	196	M	c	446.075202987129	high	2	0.8555542204329641	320.7477577640492	0.6649148045382454	96.33827614145235	373.841882277167	0.000149853542129579	-1.99340454666976	11.448224460718901
J3_190707-T002	J3	07/07/19	7	16	6pm	196	M	c	448.57663238573576	high	2	0.8163086139911115	283.66450950337065	0.647440172396884	54.72724126577936	335.22844703818913	0.00037812192202157804	-2.0789777312563302	41.372657934102996
J3_190707-T002	J3	07/07/19	7	16	6pm	196	M	c	454.3775850028417	high	2	0.5572876114746919	283.5194724740864	0.8418693940362881	40.29202564045329	370.2572726755081	0.00036108555282303	-2.10398051555077	17.7546377262454
J3_190707-T002	J3	07/07/19	7	16	6pm	196	M	c	456.32386204581076	high	2	0.7221191585305746	239.11963330215832	0.8362515448371955	84.20351204111802	383.29728817767267	0.00036534958442363606	-2.1200078055105003	79.6064907916318
J3_190707-T002	J3	07/07/19	7	16	6pm	196	M	c	458.621138031783	high	2	1.4128418319077127	290.92662360777814	0.5450135931959418	58.30581941716122	341.99544833929235	0.00013125151566692407	-2.0550688287797	2.37656499686583
J3_190707-T002	J3	07/07/19	7	16	6pm	198	F	c	465.01176611429895	high	2	0.5494384901862759	263.5813826752915	0.7970298431221999	44.33561400081372	326.1548126990332	8.189217432611005e-05	-2.22619370939158	-63.309014812934706
J3_190707-T002	J3	07/07/19	7	16	6pm	198	F	c	508.6187870735891	high	2	0.4709472773025709	280.71921345323705	0.8244607578276902	57.83291933887534	327.44267936119564	-8.477433036972791e-05		-553.118138314011
J3_190707-T002	J3	07/07/19	7	16	6pm	198	F	c	510.35184143644256	high	2	0.5729858540515238	288.69682184182386	0.9398381674883806	39.001692342592776	314.7732767363565	9.379894642825909e-05	-0.105571100345529	-15.731036559245801
J3_190707-T002	J3	07/07/19	7	16	6pm	196	M	c	557.0473744490912	high	2	0.8634033417214368	289.5895577114277	0.7678568518746934	34.235811627240025	322.2195108364144	0.00010374523385564506	-2.01578724641794	-3.24313792000218
J3_190707-T002	J3	07/07/19	7	16	6pm	198	F	d	802.5313679256598	low	3	0.5808349753398261
J3_190707-T002	J3	07/07/19	7	16	6pm	198	F	c	811.5584619105624	low	3	0.6907226733770813	348.93243991064276	0.9361500424782286	78.89460406296928	415.9446668486231	0.0003342577831252031	-2.02674769213122	22.3008678498754
J3_190707-T002	J3	07/07/19	7	16	6pm	198	F	d	812.900585391738	low	3	0.6436279456468128
J3_190707-T002	J3	07/07/19	7	16	6pm	198	F	c	816.0993070116249	low	3	0.6433823362918929	340.3863720872547	0.8726499164887187	26.534400998787874	1044.557175939945	0.0001756651110681786	-1.68307932004561	0.4219189317461529
J3_190707-T002	J3	07/07/19	7	16	6pm	198	F	c	826.0800877457782	low	3	0.8398559778563595	337.35360247603523	0.8392802231276393	39.52117815033324	1156.2700888318655	0.001350453099394618	-1.65009992919514	0.106178260779503
J3_190707-T002	J3	07/07/19	7	16	6pm	198	F	d	828.5577410031093	low	3	0.6985717946654404
J3_190707-T002	J3	07/07/19	7	16	6pm	198	F	c	830.2923968078403	low	3	0.7692138862608999	327.4667565032543	0.5870002738983051	57.67893615076417	390.82248464102287	3.1308995737479885e-07	-2.18617182756098	0.17150496450047598
J3_190707-T002	J3	07/07/19	7	16	6pm	198	F	c	835.5934459548747	low	3	0.7142700372422723	346.0039519115181	0.5022093252472645	9.418265505949364	924.127769075431	0.00015929209006827847	-1.73187883678267	0.5795450909455689
J3_190707-T002	J3	07/07/19	7	16	6pm	198	F	c	837.027166080851	low	3	0.6670784729235493	362.48261907752783	0.8471118587243409	22.686043274375553	1246.572489875818	0.0025891964812246194	-1.5486315103805302	0.193918802485486
J3_190707-T002	J3	07/07/19	7	16	6pm	196	M	d	938.0744751945197	low	3	0.4787963985909301
J3_190707-T002	J3	07/07/19	7	16	6pm	196	M	c	1356.2525830357527	high	5	0.6122314604933763	360.08724036327453	0.4526014050956904	75.4960476698264	1213.215244552815	0.008035759548754661	-1.4946868353628702	0.08763031532882201
J3_190707-T002	J3	07/07/19	7	16	6pm	198	F	d	1707.8800187690026	low	6	0.4473999134374935
J3_190707-T002	J3	07/07/19	7	16	6pm	198	F	d	1709.4890886331198	low	6	0.7692138862607862
J3_190707-T002	J3	07/07/19	7	16	6pm	196	M	c	1760.943318832533	low	6	1.0439331313539242	291.53790910217936	0.5158458590732748	48.044415543718465	648.6017310881981	8.752787566329233e-05	-1.88932477035683	5.31274264951266
J3_190707-T002	J3	07/07/19	7	16	6pm	198	F	c	1819.1106011603774	low	6	0.7782709175712625	360.1096081481736	0.9666640792282509	18.805340883547046	557.4013922245547	2.861289885479965e-05	-2.1042368931312	13.957542868167698
J3_190707-T002	J3	07/07/19	7	16	6pm	198	F	c	1910.135655586521	silence	7	0.6326534155182344	494.2512529769043	0.5946186921072927	49.068789008992674	528.1758109255703	0.00014206510684505077	-2.2781182497568198	29.0173103835608
J3_190707-T002	J3	07/07/19	7	16	6pm	198	F	c	1911.6034412674471	silence	7	0.6063083576293593	345.3499800827986	0.9077460409137408	23.10198453960061	529.0455597071759	0.00011313838222158255	-2.01502816265867	5.593288181123429
J3_190707-T002	J3	07/07/19	7	16	6pm	198	F	c	1921.096983240565	silence	7	0.7236169944926587	336.3621659966557	0.9813977437557371	110.40909100171854	499.3255696684101	3.909714134420487e-05	-2.04416607390609	9.50826155641714
J3_190707-T002	J3	07/07/19	7	16	6pm	198	F	c	2081.5755882460458	silence	7	0.533740247609785	353.58738360079684	0.9663964090710248	5.790750519717449	555.1948600284302	5.080860810248635e-06	-2.10232151257101	7.99981167807808
J3_190707-T002	J3	07/07/19	7	16	6pm	198	F	d	2083.348498288437	silence	7	0.973291039758351
J3_190707-T002	J3	07/07/19	7	16	6pm	198	F	d	2127.323665356911	silence	7	0.4866455198794029
J3_190707-T002	J3	07/07/19	7	16	6pm	196	M	c	2137.969960531505	silence	7	0.8179623503938274	467.6313901492324	0.7075264561724125	261.3699827976654	527.8538527605359	4.267819340751444e-05	-2.17705920237599	30.8735966078158
J3_190707-T002	J3	07/07/19	7	16	6pm	196	M	d	2139.304311150529	silence	7	0.4291621836878221
J3_190707-T002	J3	07/07/19	7	16	6pm	198	F	d	2179.585287421107	low	8	0.6828735520884948
J3_190707-T002	J3	07/07/19	7	16	6pm	198	F	c	2379.4190536808474	low	8	0.9104980694519328	338.99307667858994	0.8299983382406829	18.48016954784117	603.154722754043	6.841248281940339e-05	-1.9761221326619198	2.05282594025424
J3_190707-T002	J3	07/07/19	7	16	6pm	198	F	c	2381.356108938061	low	8	1.2401611635636982	335.43362552785857	0.782523967563122	53.62428940583743	599.7450603903109	2.8510760553235614e-05	-1.94458560440725	3.2550665650349804
J3_190707-T002	J3	07/07/19	7	16	6pm	198	F	d	2409.5206403198763	low	8	0.8869507055865142
J3_190707-T002	J3	07/07/19	7	16	6pm	198	F	c	2412.9008662662336	low	8	0.5729858540516943	367.0495496347133	0.6744800612734809	46.56525878313278	618.1841657864393	6.908515839742649e-06	-1.84945583109943	2.05624044541775
J3_190707-T002	J3	07/07/19	7	16	6pm	198	F	c	2421.588694075584	low	8	0.6200805817816217	308.14385405639615	0.7517507328628585	104.63262396108331	453.85307685568137	4.172842276884101e-06	-1.9899291809188602	5.1926455767806505
J3_190707-T002	J3	07/07/19	7	16	6pm	196	M	d	2425.550288811239	low	8	1.0831787377960609
J3_190707-T002	J3	07/07/19	7	16	6pm	198	F	d	2426.711958761919	low	8	0.5651367327632215
J3_190707-T002	J3	07/07/19	7	16	6pm	198	F	c	2454.001125887633	high	9	0.6020176754714157	309.543766854105	0.5975330379161371	54.63744471592986	355.1547220207213	0.000341657847868321	-2.0148758692918403	11.8699581298195
J3_190707-T002	J3	07/07/19	7	16	6pm	198	F	c	2467.2026497923084	high	9	0.7221191585308588	299.08827659798925	0.5275511631353329	75.63498262619494	336.49185565618126	0.0004828442543968421	-1.98069296562152	41.8998811438096
J3_190707-T002	J3	07/07/19	7	16	6pm	198	F	d	2470.576017986158	high	9	0.5415893688982578
J3_190707-T002	J3	07/07/19	7	16	6pm	198	F	d	2495.8406450029443	high	9	0.6828735520889495
J3_190707-T002	J3	07/07/19	7	16	6pm	198	F	d	2500.130606427383	high	9	0.9183471907404056
J3_190707-T002	J3	07/07/19	7	16	6pm	196	M	d	2510.0179771293883	high	9	0.5945149571152797
J3_190707-T002	J3	07/07/19	7	16	6pm	198	F	c	2543.6640276801154	high	9	0.841469878589578	327.8897889906358	0.6118696164147364	39.912811919763435	499.11016410557824	0.0006451708811380491	-2.13939331200789	2.67778794440679
J3_190707-T002	J3	07/07/19	7	16	6pm	198	F	d	2546.6309790357386	high	9	0.5180420050328394
J3_190707-T002	J3	07/07/19	7	16	6pm	198	F	c	2590.605917326803	high	9	0.7849121288377319	310.68318896691534	0.525852076562833	73.93586003180627	354.9014148503294	-3.320392466463391e-05	-2.91851474672867	-16.4803764012869
J3_190707-T002	J3	07/07/19	7	16	6pm	198	F	d	2594.3837793890684	high	9	0.3610595792656568
J3_190707-T002	J3	07/07/19	7	16	6pm	198	F	c	2596.1341334363765	high	9	0.5101928837448213	314.26409720748256	0.7166311400994727	107.60754625376093	345.32016577080304	-2.204985540082895e-05	-0.6315908297715329	-169.77941437028798
J3_190707-T002	J3	07/07/19	7	16	6pm	198	F	d	2598.093897206948	high	9	0.8163086139911684
J3_190707-T002	J3	07/07/19	7	16	6pm	198	F	d	2602.240591710632	high	9	0.5415893688982578
J3_190707-T002	J3	07/07/19	7	16	6pm	198	F	c	2603.779019483153	high	9	0.9208756319517306	309.43593315531615	0.4184168121493349	41.12498819062699	373.05977787229665	0.0003260923417415339	-2.04088933589988	3.45850095502267
J3_190707-T002	J3	07/07/19	7	16	6pm	198	F	c	2607.097367568847	high	9	0.7634519596922473	318.1083538845663	0.6732687039751489	60.3384305388729	374.3416236032727	0.00026128076195298304	-2.14136373192655	5.28379336169638
J3_190707-T002	J3	07/07/19	7	16	6pm	198	F	c	2611.658464058936	high	9	1.3343506190240078	293.8485601073452	0.7976943413423083	47.674973505135476	357.94896523202993	-5.831621470971809e-05	-2.21756908857295	-0.8362782259992171
J3_190707-T002	J3	07/07/19	7	16	6pm	198	F	c	2615.6201350537285	high	9	0.7823311480551638	282.85774206241257	0.8083097570149315	78.82708736204704	430.60996974197093	3.4696449411606854e-05	-2.19323848064173	-0.166528100960466
J3_190707-T002	J3	07/07/19	7	16	6pm	198	F	c	2632.127662676402	high	9	0.4626427588259503	285.6702363376316	0.9379658555172692	35.39610749874089	327.52911983380574	0.00026971223849402495	-2.10762100464744	85.5462273113638
J3_190707-T002	J3	07/07/19	7	16	6pm	198	F	d	2647.3643683908717	high	9	0.570642946996486
J3_190707-T002	J3	07/07/19	7	16	6pm	198	F	c	2675.168633950918	high	9	0.7378174011073497	316.33527430985225	0.3565626923413273	27.622244524129886	381.7773477598241	0.00023847488968074902	-2.1934612356863	9.63577264858766
J3_190707-T002	J3	07/07/19	7	16	6pm	198	F	d	2714.799582078169	high	9	0.6907226733774223
J6_190710-T002	J6	10/07/19	1	8	6pm	223	F	c	94.96009803740256	low	1	1.085112686269042	374.2209682800999	0.933225649823308	24.088327824305626	481.97094260814004	0.0007804187633105975	-2.02432532849779	17.2799464923861
J6_190710-T002	J6	10/07/19	1	8	6pm	223	F	c	96.9853135966075	low	1	0.6084157836306191	332.3226356605369	0.5810609472821343	45.06186333712849	596.7708979794455	0.00015546383177151868	-2.15479703470771	6.28570390228591
J6_190710-T002	J6	10/07/19	1	8	6pm	223	F	c	106.41492026399744	low	1	0.4327906089743577	303.2086168712689	0.5268735463380427	93.60423487900637	473.77565832609	2.3773376074828798e-06	-1.94960929002684	4.85152413355202
J6_190710-T002	J6	10/07/19	1	8	6pm	223	F	c	119.77856032620748	low	1	0.40832650305304696	431.4409385542312	0.5063553826510916	123.22545319536611	485.19404216512254	1.1279251361851792e-05	-1.9497547063477298	9.15859103865448
J6_190710-T002	J6	10/07/19	1	8	6pm	223	F	c	205.01769110201445	low	1	0.6530982967873342	368.7134995008103	0.9404288530895452	72.49983782832862	536.9237119448462	0.00040181361457303276	-2.16244847278084	11.979046408498002
J6_190710-T002	J6	10/07/19	1	8	6pm	223	F	c	210.23771638637768	low	1	0.7393337893042542	301.00324732953237	0.4570309208100898	43.12303266157216	458.06455629216833	2.557529650153769e-06	-2.1628602650669198	3.9037206258162405
J6_190710-T002	J6	10/07/19	1	8	6pm	223	F	c	282.90453985486687	low	1	0.3392718424869372	253.408470446294	0.4501250802898216	37.852697750464934	469.52251141237724	1.2160215031840658e-05	-2.14096764063501	48.693120199973706
J6_190710-T002	J6	10/07/19	1	8	6pm	223	F	c	283.9790736173446	low	1	0.4025261741767281	299.3893664471447	0.8660071175998185	17.309436681845966	565.1304517136865	1.30865090204038e-05	-2.2451371320014597	16.306759549165402
J6_190710-T002	J6	10/07/19	1	8	6pm	223	F	c	285.45697635849837	low	1	0.4969966028100998	319.9086248935216	0.9460359106109064	30.44835868659073	636.8288737038836	5.799703174549367e-05	-2.2595559568964902	14.8866155572765
J6_190710-T002	J6	10/07/19	1	8	6pm	223	F	c	286.8866346211632	low	1	0.5093188326318341	324.95600141022436	0.7468510397145603	261.0385700004001	699.0035456681195	0.00020825925661292096	-2.25116722085116	5.1678387073638
J6_190710-T002	J6	10/07/19	1	8	6pm	223	F	c	288.03009642246656	low	1	0.7475486091854009	357.214174783604	0.9022592995309278	25.176728013041163	492.63804146939276	0.00021984069459443685	-2.03666283010466	10.533925506570801
J6_190710-T002	J6	10/07/19	1	8	6pm	223	F	c	289.7527733786459	low	1	0.4641373232854562	286.0574502640631	0.5877457936923515	40.299706910489185	661.0231293438964	1.2645119353085383e-05	-1.3478947672250101	15.503399763769698
J6_190710-T002	J6	10/07/19	1	8	6pm	223	F	c	295.24786555785107	low	1	1.8113677837953899	332.99578270571936	0.5638848417270378	52.94589036966271	636.0704546743582	0.00011959124052270616	-2.06454394282504	4.85661772254021
J6_190710-T002	J6	10/07/19	1	8	6pm	223	F	c	302.1752604686799	low	1	0.7270115594825484	325.97658464053507	0.6131918289767724	27.013705640899676	552.2143642630422	0.00010845941070992543	-2.01038731211874	5.76368379428833
J6_190710-T002	J6	10/07/19	1	8	6pm	223	F	c	311.9887052460781	low	1	0.4394928636419877	280.74058402611007	0.6182950740066092	70.26100299119906	569.2397473606583	2.6103679041404106e-06	-1.7392567337412501	1.13043428711798
J6_190710-T002	J6	10/07/19	1	8	6pm	222	F	c	313.1467170556403	low	1	0.5380707022158617	375.07647018860365	0.905281311192813	40.60203201063121	514.8022931759086	0.000177277227539748	-1.8903723641694599	5.761230297429139
J6_190710-T002	J6	10/07/19	1	8	6pm	223	F	c	316.5819765166087	low	1	0.7968375284723948	338.04592484492815	0.9857767591446518	30.92940679844372	457.01570929024666	0.000436830515891289	-2.04791720861348	9.16222825500626
J6_190710-T002	J6	10/07/19	1	8	6pm	223	F	c	322.55436343962737	low	1	0.460029913344897	330.69415059866316	0.8557489137315875	118.40451458558432	689.1124205871178	6.201449646283348e-05	-2.18271904813446	10.684616940984
J6_190710-T002	J6	10/07/19	1	8	6pm	223	F	d	325.42718553241787	low	1	0.4230632238796375
J6_190710-T002	J6	10/07/19	1	8	6pm	223	F	c	330.30797549878866	low	1	0.4559225034042811	275.1897731678061	0.5934984490823287	122.56077678461695	521.1523826589206	1.8045486897149102e-05	-1.93337772705834	6.03051983146106
J6_190710-T002	J6	10/07/19	1	8	6pm	222	F	c	331.37277992246743	low	1	0.4271121903114477	377.75555803697296	0.8860546212272015	22.1312117679812	706.2332072440457	3.335434283813448e-05	-2.06930373349372	4.45784388346957
J6_190710-T002	J6	10/07/19	1	8	6pm	223	F	c	335.578425812124	high	2	0.33315072941621793	303.8930321196435	0.7133572939457801	159.89599232817758	376.80168912040085	-9.545151720302702e-05	-3.97487977981565	19.7792770280869
J6_190710-T002	J6	10/07/19	1	8	6pm	223	F	c	344.7383561262024	high	2	0.4619091856159798	314.8352667391694	0.5805269922636066	94.04020578111549	371.1125161220653	-9.63181805910841e-05	-2.36357467098622	-5.232532886241669
J6_190710-T002	J6	10/07/19	1	8	6pm	223	F	c	349.1612377783352	high	2	0.4481208517170217	316.28156908823934	0.7903704230749468	51.55463027635642	360.35743421815806	-0.00017362029459614005	-1.8905526270398	-3.8957272554444904
J6_190710-T002	J6	10/07/19	1	8	6pm	223	F	c	381.5092343242505	high	2	0.4550150186664723	320.75694022102266	0.5867509925828307	118.607453470221	385.1077101756663	-8.778672776007948e-06	-1.8432376561721298	6.505518900534849
J6_190710-T002	J6	10/07/19	1	8	6pm	223	F	c	694.4926001467882	silence	3	1.1206840198162809	349.97757182381724	0.8286378115243688	9.652810105964193	565.5527322676087	0.00041539382790859537	-1.76396688863316	4.91997340596862
J6_190710-T002	J6	10/07/19	1	8	6pm	223	F	c	696.8925787249292	silence	3	0.8940976332960417	347.6292884156597	0.9340970912491082	4.160085053513456	522.6616644018637	0.00035638799833704286	-1.96909825916198	8.24306775575965
J6_190710-T002	J6	10/07/19	1	8	6pm	223	F	c	700.8336231486534	silence	3	1.0533204994994776	299.64770019178934	0.6094204415652755	68.07929436444542	523.5689847433487	0.00013062103531092756	-2.16190260664184	6.67306714340994
J6_190710-T002	J6	10/07/19	1	8	6pm	222	F	c	710.8675682857339	silence	3	0.3521274925651596	422.23940362789864	0.7310514453547059	158.80324266176117	601.8441231102422	6.14337139364954e-05	-2.0632911384323402	4.3808950238766196
J6_190710-T002	J6	10/07/19	1	8	6pm	222	F	c	1743.873297225478	silence	6	0.2384082561334253	386.40907697952224	0.9425471115799152	40.894568970474666	398.9387173844538	5.599814287610277e-06	-1.99706097511214	372.49082113086195
J6_190710-T002	J6	10/07/19	1	8	6pm	222	F	c	1746.8978822222368	silence	6	0.5864756918367675	487.16953299931083	0.7363709256757229	33.69667382537676	487.63826035384767	0.00011395537152431377	-2.2311372588748597	131.812001457568
J6_190710-T002	J6	10/07/19	1	8	6pm	222	F	c	1749.0928297692874	silence	6	0.7973758174725845	506.3417951558329	0.9053333600187912	38.51960710568892	501.93928344160173	2.682254510361504e-05	-2.21907886943079	170.80305142568199
J6_190710-T002	J6	10/07/19	1	8	6pm	222	F	c	1750.8112344843234	silence	6	0.7973758174725845	425.93021120603953	0.7054148074055047	275.9732814944173	536.3120053989866	7.78096043403793e-05	-2.23330422673006	35.2006940119997
J6_190710-T002	J6	10/07/19	1	8	6pm	222	F	c	1753.1225325955127	silence	6	0.7887086890216324	604.6408693400335	0.8305880636275748	47.46629103537987	572.5450796061511	3.955245898294675e-05	-2.2364704568865	27.0631293264399
J6_190710-T002	J6	10/07/19	1	8	6pm	222	F	c	1755.2659677577633	silence	6	0.9013813588821904	216.6175952448093	0.9032495676007886	209.8006885798621	537.179571733142	0.00018388540724098145	-2.19668584320391	21.152640381472
J6_190710-T002	J6	10/07/19	1	8	6pm	223	F	c	2108.563758120521	high	7	0.9100484873329152	268.9046042514203	0.7205886818509506	120.93414541927204	396.69207276887937	0.00012430676031467897	-2.29754122246855	20.2385163355871
J6_190712-T002	J6	12/07/19	2	10	6pm	223	F	c	183.6232725593525	silence	1	0.495292226893497	372.1967413672226	0.981306909832212	22.797048529198374	611.25235864819	6.458464182045803e-05	-2.06242354878539	5.83182228935196
J6_190712-T002	J6	12/07/19	2	10	6pm	223	F	c	186.1165232608334	silence	1	0.3945548248134685	418.5193424725191	0.9853782708114992	12.64473059220785	794.9641658173462	8.446162416272418e-05	-2.06470612646736	2.7606837798502704
J6_190712-T002	J6	12/07/19	2	10	6pm	223	F	d	187.28344489449373	silence	1	0.7135565980669014
J6_190712-T002	J6	12/07/19	2	10	6pm	223	F	d	188.85326941024098	silence	1	0.5792400619602063
J6_190712-T002	J6	12/07/19	2	10	6pm	223	F	c	217.4125565310981	silence	1	0.4533183093601565	396.9403714838025	0.9933572713715404	8.363446889102875	424.9233944861042	1.924754686390712e-06	-1.9718627115672702	114.906156828097
J6_190712-T002	J6	12/07/19	2	10	6pm	223	F	c	505.5365535587958	low	2	0.5372661444268942	379.5325838336676	0.8102836170934858	42.51071064754387	512.6856222881881	5.5296041209216615e-05	-2.0589679037296102	6.554796093499559
J6_190713-T002	J6	13/07/19	3	13	6pm	222	F	c	1269.3246849014101	low	5	0.5844919871249203	496.3298695822921	0.9623004788167316	22.970302590949014	531.3056742333008	8.43826705043249e-05	-2.18635861032156	17.373172349116
J6_190713-T002	J6	13/07/19	3	13	6pm	222	F	c	1441.1904897717443	low	5	0.4658754814906842	369.9257425963382	0.8715116398414668	48.80234559405182	399.9299420628485	0.0003043035294815846	-2.00317387465738	105.72801645373501
J6_190713-T002	J6	13/07/19	3	13	6pm	222	F	c	1442.3112334556647	low	5	0.8619320265268016	374.1752449424563	0.9849408979065132	18.51595721240966	392.38516613547625	0.0005539905956025964	-2.01716739760725	69.4244369579245
J6_190713-T002	J6	13/07/19	3	13	6pm	222	F	c	1445.4855386377194	low	5	0.6839996778871864	374.66101663688363	0.8455925312477405	27.505760105537266	403.4208170880474	0.0004122087861136394	-2.01992396528067	65.3237096955482
J6_190713-T002	J6	13/07/19	3	13	6pm	222	F	c	1449.4858793346207	low	5	0.6100537667641674	374.6190939047215	0.7874184379063336	42.39472926434377	439.1100289345878	0.00010330367132313332	-2.08209377841769	28.137775947245803
J6_190713-T002	J6	13/07/19	3	13	6pm	222	F	c	1488.9472236619613	low	5	0.5965813175237145	353.6976458076012	0.935623909349347	134.6503942749323	394.1079569147005	0.0004299404650711857	-1.96764628445245	58.3942828699979
J6_190713-T002	J6	13/07/19	3	13	6pm	222	F	c	1491.5799629545113	low	5	0.7068191696748727	490.2907300550463	0.7818107887017315	23.42849413926132	516.7755884676242	0.0014159537792085544	-2.2754533968159505	31.2272802889384
J6_190713-T002	J6	13/07/19	3	13	6pm	222	F	c	1586.6351150192636	silence	6	0.7084372569240713	482.41054190358466	0.6178694483269134	162.78665590093215	440.87533446840484	0.00015468251281556544	-2.16370762651276	46.888923509635
J6_190713-T002	J6	13/07/19	3	13	6pm	222	F	c	1587.9816865992184	silence	6	0.5299759631952838	463.4029926634865	0.9976462680492492	27.22512972284005	463.9883263242818	2.6536617546888444e-05	-2.15887647556073	213.747421958496
J6_190713-T002	J6	13/07/19	3	13	6pm	222	F	c	1588.9464030962495	silence	6	1.0004648284807445	479.3976254997488	0.9835869886990302	72.66870478883226	503.33656438707635	3.687446370477074e-05	-2.26201016681281	176.593047397929
J6_190713-T002	J6	13/07/19	3	13	6pm	222	F	c	1590.9179991597446	silence	6	1.216781548152312	391.4526417601048	0.9949228450609202	111.74041001792965	500.84448182531935	0.00016964937317885207	-2.22462859323942	36.8559030409072
J6_190713-T002	J6	13/07/19	3	13	6pm	222	F	d	1731.6155548912561	silence	6	0.3279255269405894
J6_190713-T002	J6	13/07/19	3	13	6pm	222	F	c	1746.1816015563097	silence	6	0.7228233394566814	468.92517039949087	0.9632829297316504	6.954136709611929	674.6398137241208	0.00010697217655526365	-2.16304770396623	2.82848462675383
J6_190713-T002	J6	13/07/19	3	13	6pm	222	F	c	1747.1976846506318	silence	6	0.5865195097305786	461.7961554337477	0.9951516748255888	12.944633147593038	579.5902723420834	3.22664971719184e-05	-2.17343110970054	4.62023142001584
J6_190713-T002	J6	13/07/19	3	13	6pm	222	F	c	1801.2932141229694	silence	6	0.5417972298475888	428.3974278955698	0.9862153749531531	11.499766468942482	614.8299629281009	2.9663578780985297e-05	-2.16581459332621	12.023350669247598
J6_190713-T002	J6	13/07/19	3	13	6pm	222	F	d	1803.1229960581088	silence	6	0.6111875302792669
J6_190713-T002	J6	13/07/19	3	13	6pm	222	F	d	1804.1209105669088	silence	6	0.8488700093466832
J6_190713-T002	J6	13/07/19	3	13	6pm	222	F	c	1805.8059112659066	silence	6	0.7252157166465167	494.18450484129784	0.9834712945082332	25.227637563832847	555.8637341602956	0.00022356592119700602	-2.2839433820492996	7.63621618478129
J6_190714-T002	J6	14/07/19	4	11	6pm	222	F	c	63.785108902422245	low	1	0.5137775496818904	478.22860162778153	0.948390453015346	17.100731948817895	495.9682148448658	0.0001358278432896181	-2.13997106338857	38.5483568691944
J6_190714-T002	J6	14/07/19	4	11	6pm	222	F	c	65.3345967506692	low	1	0.6442607369026803	449.81536669620544	0.90334217385538	32.52231182252632	600.6264494350427	1.5641407587793616e-05	-2.13072473089373	3.31769346441794
J6_190714-T002	J6	14/07/19	4	11	6pm	222	F	c	72.9290518630022	low	1	0.6116399400974757	265.7062205481103	0.6635125460323329	163.61119418065798	585.1739514229394	3.7531815063911265e-05	-2.2501248881125804	4.73424123194412
J6_190714-T002	J6	14/07/19	4	11	6pm	222	F	c	82.87521746660603	low	1	0.7747439241234702	486.04162033409744	0.9556934007306996	24.31003860548577	504.5174763270271	8.434525545857346e-05	-2.05706559305027	39.0777846377639
J6_190714-T002	J6	14/07/19	4	11	6pm	222	F	c	88.2304319892918	low	1	0.5790191432922853	447.6264996547682	0.727547098357513	126.92370657867642	501.3608662832329	1.733130780746165e-05	-2.16893785030091	9.61402327037278
J6_190714-T002	J6	14/07/19	4	11	6pm	222	F	c	91.2724521757408	low	1	0.8318303185325675	495.20825169610833	0.8169058352729879	163.92669317655648	823.4641025762161	2.844423769081633e-05	-1.9533582056202299	0.5962679977652521
J6_190714-T002	J6	14/07/19	4	11	6pm	222	F	c	93.21420830815642	low	1	0.5463983464870807	427.66812687821914	0.6680582929696667	146.79756392084508	599.8817258760204	6.65822609965769e-06	-1.9641293563514999	1.87912059771545
J6_190714-T002	J6	14/07/19	4	11	6pm	222	F	c	94.64952336758516	low	1	0.6442607369026803	469.9116391797727	0.9206863632965724	24.421132002352238	488.34224249771376	0.0001283226967861125	-2.1615363557591	42.0241200478704
J6_190714-T002	J6	14/07/19	4	11	6pm	222	F	c	95.984159241848	low	1	0.5953295416948805	484.71879479503855	0.5867033345545591	85.8297500351656	800.4682318737728	0.0001306391888661475	-1.90118026134493	1.70550687850786
J6_190714-T002	J6	14/07/19	4	11	6pm	222	F	c	97.75986371112312	low	1	0.5382431472857832	390.54761155479963	0.6906490117859597	154.82227694238262	603.6909784901873	1.8062801176840495e-05	-2.12459185592833	3.36337581536883
J6_190714-T002	J6	14/07/19	4	11	6pm	222	F	c	99.45614514499347	low	1	0.6605711353052754	416.846258727025	0.6070824362405499	204.554198415768	531.2070436030737	2.9497182110747095e-05	-2.00491008140627	7.75673299318785
J6_190714-T002	J6	14/07/19	4	11	6pm	222	F	c	101.64563581692666	low	1	0.4811567528766858	449.94490935151407	0.883336179853978	78.9621160693946	480.6059525991751	2.1369913235699537e-05	-2.20831089239427	31.0285083371596
J6_190714-T002	J6	14/07/19	4	11	6pm	222	F	c	104.38152483534695	low	1	0.6931919321104799	409.58974073360963	0.9887256512172558	42.536082775074185	508.5483532121084	7.467780237407703e-05	-1.96112869557923	9.62357061089725
J6_190714-T002	J6	14/07/19	4	11	6pm	222	F	c	107.74454546976105	low	1	0.7665887249221868	483.0163597494532	0.9720245510536846	18.49166661414449	523.8009441119792	0.00012304716259635694	-2.0959766873715098	15.687265791226
J6_190714-T002	J6	14/07/19	4	11	6pm	222	F	c	113.68411754019013	low	1	0.4240703584675885	371.36560253470435	0.4804570915000045	143.29802314028274	547.6916855595433	4.722014334831651e-06	-1.99554174792433	1.6179496723731202
J6_190714-T002	J6	14/07/19	4	11	6pm	222	F	c	115.8207797309307	low	1	0.4648463544740764	475.43984241718204	0.9376639267189087	29.88329284863994	590.6714145109908	0.00017501914522275217	-2.1610036860751296	5.10069968567904
J6_190714-T002	J6	14/07/19	4	11	6pm	222	F	c	118.53000875295663	low	1	0.5627087448896759	312.5300347061426	0.551670520314209	243.87090176732863	517.3973843487978	5.92943692384628e-05	-2.2637244522516404	14.2968529117119
J6_190714-T002	J6	14/07/19	4	11	6pm	222	F	c	191.62200987566777	low	1	0.5953295416948947	470.56696737564283	0.568884927638479	92.14072646700214	557.3897165244551	3.092915783773834e-05	-2.09957532137342	8.24324761286474
J6_190714-T002	J6	14/07/19	4	11	6pm	222	F	c	193.39483210801043	low	1	0.6850367329091682	455.02373476899004	0.4003822286663297	149.32048054315192	808.3623564566188	3.6480718937815134e-05	-1.97065170403754	1.13919268577746
J6_190714-T002	J6	14/07/19	4	11	6pm	222	F	c	194.67519838261447	low	1	0.3996047608636957	267.64816198324667	0.8885075567428586	65.7089420480741	470.845650839163	1.5804402682642988e-05	-2.16750151994901	61.554280737076304
J6_190714-T002	J6	14/07/19	4	11	6pm	222	F	c	196.0044958524263	low	1	0.5382431472857832	483.05164876992484	0.9626659860420546	15.312955113877704	517.0397533417606	9.426302500455617e-05	-2.24650706970437	11.948897443197101
J6_190714-T002	J6	14/07/19	4	11	6pm	222	F	c	197.70981665018618	low	1	0.4893119520779976	479.5828153378811	0.9589220878064059	17.08532315713768	554.3212976144207	0.0003086157559562193	-2.2456721704752702	7.02547423722376
J6_190714-T002	J6	14/07/19	4	11	6pm	222	F	c	199.2022181040241	low	1	0.5953295416948663	453.7409682460511	0.9490275781678256	143.5660749879725	496.09993569143217	6.573574798365735e-05	-2.2076982641458796	17.1958930363518
J6_190714-T002	J6	14/07/19	4	11	6pm	222	F	c	200.5345941373146	low	1	0.5463983464870807	472.9487850161186	0.990545197644806	41.89811824837784	482.4960274227666	7.456146401194368e-05	-2.2112291217818902	46.277893037875394
J6_190714-T002	J6	14/07/19	4	11	6pm	222	F	c	202.62910465576454	low	1	0.5219327488831595	434.0466923658555	0.7465863568155479	93.71477370543164	456.27699310108267	7.606848747377886e-05	-2.19059307067812	25.0487191478053
J6_190714-T002	J6	14/07/19	4	11	6pm	222	F	c	208.04379629819584	low	1	0.994934302558562	409.5245793522312	0.39028435933853584	198.80809341932223	476.20830852119593	4.2515349692876356e-05	-2.1775546225725297	35.6452419763281
J6_190714-T002	J6	14/07/19	4	11	6pm	222	F	c	229.4247625576202	low	1	0.4159151592662909	409.8934748261155	0.8139637173899832	88.74320757216988	409.74042906597765	5.94959371259398e-06	-2.17104892497959	66.1963053066681
J6_190714-T002	J6	14/07/19	4	11	6pm	222	F	d	230.78668082423724	low	1	0.7258127289156846
J6_190714-T002	J6	14/07/19	4	11	6pm	222	F	c	232.81519646875265	low	1	0.47300155367537394	474.6246503046145	0.9861625778513524	19.269468397548852	539.1607697165604	0.0001329265748912286	-2.22565407311366	8.625917988202639
J6_190714-T002	J6	14/07/19	4	11	6pm	222	F	c	234.46254670741519	low	1	0.521932748883188	447.9812619098342	0.9117125273349922	29.96546391564516	456.1037602891943	3.910765643588588e-05	-2.2017979060858996	54.55480086877029
J6_190714-T002	J6	14/07/19	4	11	6pm	222	F	c	238.3158289007777	low	1	0.8889167129416649	471.02080725136034	0.9797883199429384	156.21191305619757	725.2399095117613	7.78631049351416e-05	-2.0964637235359698	2.17334265187704
J6_190714-T002	J6	14/07/19	4	11	6pm	222	F	c	247.92461821583183	low	1	0.6768815337078988	455.50910522158796	0.7189083267398508	163.05568575936059	538.6034938284156	1.084616992457232e-05	-2.26114514722334	4.65260146873222
J6_190714-T002	J6	14/07/19	4	11	6pm	222	F	d	250.54112692534713	low	1	0.3098975696493937
J6_190714-T002	J6	14/07/19	4	11	6pm	222	F	c	251.4055780406849	low	1	0.6034847408961639	492.5887932827554	0.8835936955667357	13.168317657892315	796.6782111612358	0.0012391160998588139	-2.03283434788304	1.72048350996777
J6_190714-T002	J6	14/07/19	4	11	6pm	222	F	c	252.81642750250973	low	1	0.521932748883188	496.8955174903274	0.906070868773412	27.04537714525867	923.2007342369052	0.0006027756768554876	-2.02200073350002	0.6860442957499311
J6_190714-T002	J6	14/07/19	4	11	6pm	222	F	c	263.5240397531309	low	1	0.5463983464870807	491.43945040992503	0.4886607950225888	257.94208346516115	974.3236103691644	0.0023243646242473975	-1.98889671676662	0.577968775063525
J6_190714-T002	J6	14/07/19	4	11	6pm	222	F	c	266.7158666465	low	1	0.3343631672532865	521.0596380632225	0.861410198992909	20.067712889027575	596.954586946202	9.035261485521109e-05	-2.0907568457045502	9.335501732955
J6_190714-T002	J6	14/07/19	4	11	6pm	222	F	c	272.4967235304837	low	1	0.6605711353053039	345.83635932113503	0.6689160769178413	125.36122168366668	512.84359742115	0.00015039988181654457	-2.0084243425978703	19.501729907332198
J6_190714-T002	J6	14/07/19	4	11	6pm	222	F	c	302.0475285282776	low	1	0.6850367329091682	545.9680071809396	0.9626078865122034	63.817056286981476	725.3460814645649	0.0003728901264303065	-2.11634997813999	3.4758812156406895
J6_190714-T002	J6	14/07/19	4	11	6pm	222	F	c	585.4000751735182	high	2	0.4322255576688576	390.4973359981454	0.6758377531312924	68.81547363590511	378.55321478763153	8.122035137265397e-05	-2.18920911995901	122.72087784595199
J6_190714-T002	J6	14/07/19	4	11	6pm	222	F	c	727.3654487065352	silence	3	0.8236751193312557	398.907413347315	0.9988541106526212	79.11550395712051	417.082696734308	0.0006018836735210377	-2.10179971226896	61.08622637720921
J6_190714-T002	J6	14/07/19	4	11	6pm	222	F	c	728.7574808987773	silence	3	0.5041249128863683	468.6485334387046	0.9972644133221756	12.38080147567348	554.6744719072963	0.00044901421564387366	-2.26202567877912	6.85997674197567
J6_190714-T002	J6	14/07/19	4	11	6pm	222	F	c	730.096323269309	silence	3	0.4663155444197855	496.26134204103136	0.9920389986120508	21.177966675887088	563.4245074797427	0.0005244005735737006	-2.24501972612152	9.031206247819698
J6_190714-T002	J6	14/07/19	4	11	6pm	222	F	c	731.3744791068357	silence	3	0.6616639481634365	493.2812781737115	0.9918515070241732	21.434265654468614	868.4962428743324	0.0017814056739665102	-2.0929313024424196	1.01219505730759
J6_190714-T002	J6	14/07/19	4	11	6pm	222	F	c	738.0012240064324	silence	3	0.7183780008630265	373.9540076130384	0.949638332117127	28.033714110973328	454.574127206956	0.000191487774343304	-2.09713654686658	11.016177871092
J6_190714-T002	J6	14/07/19	4	11	6pm	222	F	c	740.2355737792446	silence	3	0.5356327199417592	382.420128316344	0.8768271714517533	44.965535801247036	451.9060054505383	0.00031847352216621554	-2.10866617727625	27.6154387326254
J6_190714-T002	J6	14/07/19	4	11	6pm	222	F	c	745.6081528405896	silence	3	0.7057748780408701	379.5451205349051	0.8825992050031944	40.75064042911004	446.43285077132487	0.0008695429395293197	-2.10190673297243	18.4911645431242
J6_190714-T002	J6	14/07/19	4	11	6pm	222	F	d	746.9584854992058	silence	3	0.7939967377959647
J6_190714-T002	J6	14/07/19	4	11	6pm	222	F	c	748.641002395964	silence	3	0.6049498954636192	504.30986231147483	0.9897943511568436	34.719288682007395	780.2663443324269	0.001062934827222505	-2.1620880189730802	1.6067955954758302
J6_190714-T002	J6	14/07/19	4	11	6pm	222	F	c	780.2851776140099	silence	3	0.5104264742974465	457.22837135050105	0.6682417274478111	166.17942522089862	725.1753824163272	0.00019426919549214662	-2.17669611393947	1.9040564647150702
J6_190714-T002	J6	14/07/19	4	11	6pm	222	F	c	781.2470908404297	silence	3	0.4789186672419419	386.267950279164	0.9857932573652464	34.921729135386954	417.22898412744973	0.0011064978765318006	-2.1001660946575402	39.6219691294645
J6_190714-T002	J6	14/07/19	4	11	6pm	222	F	c	782.1986266135028	silence	3	0.5608389655860719	490.3356516503752	0.9822111274794091	26.987962236433592	932.5831613261348	0.0015780806086676538	-2.0365357053993702	0.840749374373729
J6_190714-T002	J6	14/07/19	4	11	6pm	222	F	c	783.7082968240409	silence	3	0.983043580128424	450.91512524422006	0.9092771462024496	65.23299899195325	862.7704116349449	0.003188346048689815	-1.99096013039033	1.2088444597615802
J6_190714-T002	J6	14/07/19	4	11	6pm	222	F	c	785.9231079365277	silence	3	0.6112514568746974	397.0098455523773	0.9403516962956686	165.75674025843242	628.7130230144377	0.00033675580538543987	-2.16386032719649	3.24855674278535
J6_190714-T002	J6	14/07/19	4	11	6pm	222	F	c	790.0021200977723	silence	3	0.5167280357085247	488.31583211565595	0.9746175684828756	9.662784146087633	564.4934533468484	0.000508583861003312	-2.2610949108928997	6.66013664204988
J6_190714-T002	J6	14/07/19	4	11	6pm	222	F	c	791.2361132996064	silence	3	0.8444092290845902	408.4713472857638	0.4057952449846248	27.450696938710625	633.6485946681915	0.0018151865651647016	-2.00255856925464	2.84775171377606
J6_190714-T002	J6	14/07/19	4	11	6pm	222	F	c	793.6217005462842	silence	3	0.4474108601866647	481.01043328719084	0.6660586872651144	148.40397706674014	670.8524601066605	0.00025812865810930505	-2.10324198923285	3.28007995217499
J6_190714-T002	J6	14/07/19	4	11	6pm	222	F	c	795.4016005097759	silence	3	0.2898718249095964	292.0925842805283	0.8785696695774929	152.9049045262014	603.8279766918192	5.023592150343126e-06	-2.22374616778549	55.611862300392296
J6_190714-T002	J6	14/07/19	4	11	6pm	222	F	d	1597.030651965803	silence	6	0.3528874390206056
J6_190714-T002	J6	14/07/19	4	11	6pm	222	F	d	1598.0767111600424	silence	6	0.37809368466469095
J6_190714-T002	J6	14/07/19	4	11	6pm	222	F	c	1599.1353734771035	silence	6	0.5041249128862546	431.5180519749648	0.9946705981117336	32.420169930165116	600.6780341734664	8.428524315871977e-05	-2.08063414869569	6.011307040351759
J6_190714-T002	J6	14/07/19	4	11	6pm	222	F	c	1601.7334670009295	silence	6	0.5671405269972638	426.6630579753125	0.99333969623401	27.11188052347063	553.0737723788162	5.326482857127068e-05	-2.0921169900131202	12.6197412232225
J6_190714-T002	J6	14/07/19	4	11	6pm	222	F	c	1794.2559922143523	silence	6	0.4159030531313874	426.21009727809786	0.9903920526650528	14.39130456024003	407.0320700122461	7.936348471702521e-06	-2.06562094366278	893.1725070484359
J6_190714-T002	J6	14/07/19	4	11	6pm	222	F	d	1795.826879522356	silence	6	0.504124912886482
J6_190714-T002	J6	14/07/19	4	11	6pm	222	F	c	1797.31526426174	silence	6	0.6112514568746974	504.1276035982081	0.958862644464034	37.06611954984567	751.4403398886278	0.00017769442746800898	-2.1802410176242097	1.85593149139283
J6_190714-T002	J6	14/07/19	4	11	6pm	222	F	c	1798.4255553164587	silence	6	0.5482358427639156	456.2950355620124	0.9763863000139364	16.94816463039217	611.1745944845512	0.00010804192678440105	-2.19934463913867	4.9626784352833395
J6_190714-T002	J6	14/07/19	4	11	6pm	222	F	c	1802.619845805563	silence	6	0.504124912886482	460.3396003110985	0.9174947977380252	29.490680353546963	638.5345980758402	7.98879758007541e-05	-2.16431164417029	3.31813004760257
J6_190714-T002	J6	14/07/19	4	11	6pm	222	F	c	1804.588313752742	silence	6	0.5923467726415765	429.81720692468224	0.8876746188462687	43.91789939569435	423.69249569597605	0.0001892165167999221	-2.1271698511993797	41.245688097019894
J6_190714-T002	J6	14/07/19	4	11	6pm	222	F	c	1805.7226465125518	silence	6	0.6301561411080456	447.7788812659487	0.9786268918261252	23.676954145411454	654.5925900301643	8.756931897839383e-05	-2.1485926970631497	4.0765038238515405
J6_190714-T002	J6	14/07/19	4	11	6pm	222	F	c	1806.9165529706283	silence	6	0.6805686323966711	475.4067546300995	0.9817373679998396	25.85922156047019	671.7011141589828	7.286320402604025e-05	-2.20754231004733	2.82499719461295
J6_190714-T002	J6	14/07/19	4	11	6pm	222	F	c	1808.546431706623	silence	6	0.4726171058309774	439.1293191763575	0.9988262880632809	181.75669226948241	491.406102227538	1.87633561326245e-05	-2.17623037034561	30.679201934534003
J6_190714-T002	J6	14/07/19	4	11	6pm	222	F	c	1810.630126275846	silence	6	0.598648334052541	573.2053441976249	0.8114575623054704	251.0146959399134	484.7574105670871	4.0355025232652274e-05	-2.2070988711219504	22.062378396186105
J6_190714-T002	J6	14/07/19	4	11	6pm	222	F	c	1812.2359116009332	silence	6	0.7120764394521757	445.0946186189456	0.8432839368169117	226.56556713831054	483.9080290570751	1.785958573463201e-05	-2.19491641302981	28.4125366888658
J6_190714-T002	J6	14/07/19	4	11	6pm	222	F	c	1815.0162198412188	silence	6	0.6616639481633229	368.06441119972993	0.9788356796591554	298.44919649307235	465.40055644875764	0.00020105632394635647	-2.1701167479611696	14.8496734765395
J6_190714-T002	J6	14/07/19	4	11	6pm	222	F	c	1816.2072149479127	silence	6	0.7876951763851139	371.51757580392996	0.954820839775848	18.13487125648044	975.6893831102182	0.0014032497451622813	-1.80239588777385	0.327271736113885
J6_190714-T002	J6	14/07/19	4	11	6pm	222	F	c	1859.4388352598896	low	7	0.6049498954637329	461.26522481657616	0.8540960201304396	44.433840533337154	673.7802452712652	3.764288122472087e-05	-2.12355967046962	2.1747912880378704
J6_190714-T002	J6	14/07/19	4	11	6pm	222	F	d	1860.465989769896	low	7	0.6364577025190101
J6_190714-T002	J6	14/07/19	4	11	6pm	222	F	c	1861.7996951195694	low	7	0.5419342813527237	470.62269266449204	0.7992831775654047	31.432571875056	529.2720494455514	6.056806889126791e-05	-2.25855021837048	9.4529430881922
J6_190714-T002	J6	14/07/19	4	11	6pm	222	F	c	1862.7381489111733	low	7	0.5230295971196028	479.92710921791667	0.940905680725558	16.012850187885366	488.0956320622061	2.6250315651850674e-05	-2.21524898844102	19.655912432064603
J6_190714-T002	J6	14/07/19	4	11	6pm	222	F	d	1865.1757920483396	low	7	0.4285061759535438
J6_190714-T002	J6	14/07/19	4	11	6pm	222	F	c	1870.3455566039768	low	7	0.8129014220291992	343.19171442402137	0.4823788781907454	159.02321372676315	594.5840197991014	4.28584055135406e-05	-2.2560880186100896	8.00280688760855
J6_190714-T002	J6	14/07/19	4	11	6pm	222	F	c	1876.794796655142	low	7	0.5734420884082283	481.04701118412254	0.6083856222925087	101.43981270306358	760.3890494684067	0.0009578425733873022	-2.16610176830062	1.8032840305189397
J6_190714-T002	J6	14/07/19	4	11	6pm	222	F	c	1878.3008698323904	low	7	0.6427592639302021	363.4347817456808	0.5538015837824096	38.00823572613972	620.0387463014299	0.00025531479398476517	-1.9743394605296698	2.0573405361732098
J6_190714-T002	J6	14/07/19	4	11	6pm	222	F	c	1879.723379312095	low	7	0.3906968074868473	318.3041715521689	0.7616943164065573	187.73952282796117	542.3298387784622	3.441051211836005e-05	-2.2264017923174597	11.7018381775822
J6_190714-T002	J6	14/07/19	4	11	6pm	222	F	c	1886.9860513497488	low	7	0.5419342813527237	424.42107438491996	0.6289315474721497	68.26852027583016	651.5805781135074	0.0003021003554424028	-2.09498270741685	3.9059807403901803
J6_190714-T002	J6	14/07/19	4	11	6pm	222	F	c	1889.4735247079266	low	7	0.8444092290844765	364.2166716332935	0.9830741722787244	14.866728975162404	1002.2506633173108	0.0008208874055171991	-1.89896384239852	0.41882828154466295
J6_190714-T002	J6	14/07/19	4	11	6pm	222	F	c	1894.3895834079221	low	7	0.5608389655860719	379.066475686561	0.7140807545964952	47.41428832258441	548.428360184899	0.0006474315271843369	-2.02331991295984	5.1394523514284804
J6_190714-T002	J6	14/07/19	4	11	6pm	222	F	c	1895.559978725368	low	7	0.5545374041751074	312.7241532272359	0.6905639973782706	82.87154702445878	530.7508261050704	1.774368637019583e-05	-2.11913106757673	7.18683315969761
J6_190714-T002	J6	14/07/19	4	11	6pm	222	F	c	1897.6957291850783	low	7	0.5671405269972638	322.938248536987	0.8863664916223477	96.7197144021208	731.1094115886399	9.774397355159439e-05	-2.08137474911907	7.66515296988137
J6_190714-T002	J6	14/07/19	4	11	6pm	222	F	c	1898.9635592750744	low	7	1.146884176816684	468.8793274348317	0.9670273709094588	136.0493022469281	854.0726990813699	0.0025020949287023544	-2.1100462336250003	1.29947996426233
J6_190714-T002	J6	14/07/19	4	11	6pm	222	F	c	1901.4900582480868	low	7	0.4348077373645083	385.71154453935725	0.7885467140602952	19.64669372986037	494.49261861551867	0.000451934707645003	-2.03924458525232	8.29624908335235
J6_190714-T002	J6	14/07/19	4	11	6pm	222	F	c	1905.6086782944433	low	7	0.5860452112303847	374.62205404677377	0.9141875240182864	9.935466425733068	582.985109367762	0.00010575618167175135	-2.05284060795505	4.04316288595634
J6_190714-T002	J6	14/07/19	4	11	6pm	223	F	c	1908.4588342747115	low	7	0.9011232817845212	365.25292699477586	0.5867189452233299	195.52344676683845	924.7475646615404	0.0003648656482073565	-1.89416719489689	1.00577530149535
J6_190714-T002	J6	14/07/19	4	11	6pm	222	F	c	1914.2394231343922	low	7	0.4159030531313874	369.30550120033416	0.5809869665163012	110.3140117711614	389.28118002229513	3.4518636530799295e-06	-1.97124060078982	15.0368987481565
J6_190714-T002	J6	14/07/19	4	11	6pm	222	F	d	1915.1342448547653	low	7	0.4978233514752901
J6_190714-T002	J6	14/07/19	4	11	6pm	222	F	c	1916.287430592993	low	7	0.5860452112303847	468.61878893985914	0.974900935122438	32.83096043759048	890.6866258696547	8.53466740191304e-05	-1.8820739755663	1.0934796789153198
J6_190714-T002	J6	14/07/19	4	11	6pm	222	F	c	1922.9233366995675	low	7	0.4915217900643256	262.93240713890714	0.6121852400673731	209.24827247910926	545.4330938489495	0.00013421989068060786	-2.2107884843667596	9.472402484257751
J6_190714-T002	J6	14/07/19	4	11	6pm	222	F	c	1945.4353983987116	low	7	0.18904684233234548	367.4735675330944	0.7937024103646936	50.714192825634136	366.6468766270562	-4.0862743895585525e-06	-3.6026898351188397	-188.814176695326
J6_190714-T002	J6	14/07/19	4	11	6pm	222	F	c	1946.356112046636	low	7	0.4411092987754728	483.0202139128827	0.9537889321599876	67.9994820737665	528.0287013206034	3.674976795473621e-05	-2.20788723950784	9.72913652226709
J6_190714-T002	J6	14/07/19	4	11	6pm	222	F	c	1948.0134226977493	low	7	0.5797436498191928	423.7690405174037	0.8218799086862421	164.33341592654918	1015.2490874910624	8.93573634705903e-05	-1.68059816192305	0.3817065826021189
J6_190714-T002	J6	14/07/19	4	11	6pm	222	F	c	1952.4271032956888	low	7	0.5230295971196028	478.6812907597196	0.9801996777555394	22.98574791093091	946.99263580912	0.00024378896020810323	-1.9123031188046298	0.8443870451424921
J6_190714-T002	J6	14/07/19	4	11	6pm	222	F	c	1956.719255710171	low	7	0.8022968065440637	463.8826385785093	0.6086061913702581	21.610161502722068	1148.1716004687307	0.0013920542319877385	-1.73885063389381	0.437840431621873
J6_190714-T002	J6	14/07/19	4	11	6pm	222	F	c	1959.7200668940293	low	7	0.7561873693296093	402.4795454522473	0.4654240776386181	83.8095000668252	1255.0473625382906	0.0009440455191604907	-1.56388435193216	0.168638652552981
J6_190714-T002	J6	14/07/19	4	11	6pm	222	F	c	1961.7922194693508	low	7	0.5230295971196028	498.76592788593626	0.7109759242144611	23.235062083649158	1018.9687156564612	0.000872105703510187	-1.9037729501571399	0.474429422039867
J6_190714-T002	J6	14/07/19	4	11	6pm	222	F	c	1964.3565278108304	low	7	0.5041249128862546	450.4179409360987	0.5844639321978601	21.513206970925694	551.1109203733425	0.00010188988713211623	-1.7539071790021898	14.8290728615501
J6_190714-T002	J6	14/07/19	4	11	6pm	222	F	c	1979.12360859505	low	7	1.0586623170615894	404.8042485541559	0.8234957194655985	127.63215042766888	640.4268321273132	4.09890176809379e-05	-2.21806509396031	5.38793936241296
J6_190714-T002	J6	14/07/19	4	11	6pm	222	F	c	1985.742887392683	low	7	0.8570123519068602	374.0320510382495	0.5530043552895718	153.42185380061795	887.3558282540773	0.000423386257873953	-1.95888812592192	0.8949834528476791
J6_190714-T002	J6	14/07/19	4	11	6pm	222	F	c	1989.2157851179104	low	7	0.6994733166300193	388.21893736126475	0.7869269060393724	11.853436736051664	1135.6335684765113	0.0003941060030031225	-1.68766799340295	0.22176205518053602
J6_190714-T002	J6	14/07/19	4	11	6pm	222	F	c	1990.623944663963	low	7	0.7876951763851139	394.4833432552872	0.7261678956496069	41.1639399987394	1181.8097342536498	0.0007724137906021748	-1.70605814323161	0.179099078032339
J6_190714-T002	J6	14/07/19	4	11	6pm	222	F	c	1991.9026310659506	low	7	1.1846935452829257	385.31298995618437	0.9326403938433986	29.486540739828573	1227.110983971872	0.009740141750072056	-1.5790316886494398	0.0265493776260502
J6_190714-T002	J6	14/07/19	4	11	6pm	222	F	c	1999.902106930057	low	7	0.5419342813529511	369.986713841076	0.926116915630014	18.305413059229863	423.3344419422645	0.00032086581380935377	-2.06940564056665	26.887342277259002
J6_190714-T002	J6	14/07/19	4	11	6pm	222	F	c	2001.0426895454627	low	7	0.7309811236852966	405.15884205104754	0.7406021938912698	32.244442754027205	851.8663229162338	0.00023899142684635536	-1.89738609856932	1.01487942658389
J6_190714-T002	J6	14/07/19	4	11	6pm	222	F	c	2002.3975769546607	low	7	0.5608389655860719	419.47192196653657	0.9148364261033204	133.38069139903746	1309.7682444137085	0.002410683520904629	-1.55089031979828	0.06175385167511199
J6_190714-T002	J6	14/07/19	4	11	6pm	222	F	c	2005.161840156279	low	7	0.4978233514752901	474.5033379551237	0.9668687182217632	14.311129142896734	962.9737630388616	0.0015748051424171613	-2.0204939576565097	1.09729077980174
J6_190714-T002	J6	14/07/19	4	11	6pm	222	F	c	2007.505011578094	low	7	0.4789186672419419	514.0627186623907	0.6478343497182023	45.691567684412966	717.0143163184422	0.00038200895578719335	-2.21167852634123	2.23511405814589
J6_190714-T002	J6	14/07/19	4	11	6pm	222	F	c	2008.393531737056	low	7	0.6364577025190101	417.4866808924023	0.8146999988543062	35.870715924838116	1142.0380769746625	0.009763843921504547	-1.7030722217321501	0.207285372177645
J6_190714-T002	J6	14/07/19	4	11	6pm	222	F	c	2009.6785197004554	low	7	1.0901701241168666	402.2450778676261	0.9811067410472242	26.947274858276163	1175.9625987225004	0.012537982655578562	-1.6738951439810201	0.18688621955920998
J6_190714-T002	J6	14/07/19	4	11	6pm	222	F	c	2012.714862877488	low	7	0.6553623867523584	382.4924542773685	0.8942726437089813	21.430744257592327	1080.6637835382844	0.0049099389583672675	-1.75946971554626	0.23561933305906502
J6_190714-T002	J6	14/07/19	4	11	6pm	222	F	c	2014.1666027889576	low	7	0.6112514568746974	389.7556292033162	0.9700887021442592	30.425447623442093	1038.0319958274497	0.004364654347600555	-1.82816562132467	0.396535593327658
J6_190714-T002	J6	14/07/19	4	11	6pm	222	F	c	2015.8188798308454	low	7	0.598648334052541	414.321486842518	0.8679611951251782	176.86181482861156	757.4686906065939	0.0011941700841946754	-2.00434350902184	1.99573265411884
J6_190714-T002	J6	14/07/19	4	11	6pm	222	F	c	2020.5882558075562	low	7	0.5356327199417592	571.3822503456573	0.8740310979191421	187.8745057758403	686.9714065001874	0.0013341448211878016	-2.2314533493134903	5.26930556567421
J6_190714-T002	J6	14/07/19	4	11	6pm	222	F	c	2021.6658745146665	low	7	0.920027966017642	429.7725511833929	0.976323105358456	39.511632519448426	1363.2975923684946	0.01296608970476646	-1.5485590556622197	0.193934766767455
J6_190714-T002	J6	14/07/19	4	11	6pm	222	F	c	2023.2929453109084	low	7	0.5734420884082283	420.6255254277957	0.7879025665302705	40.31229675758749	1047.0728702359868	0.003553406654624323	-1.82273096429375	0.42888373237082705
J6_190714-T002	J6	14/07/19	4	11	6pm	222	F	c	2024.3877218914224	low	7	0.6553623867523584	382.52809854530113	0.9265210515410798	52.55375371496143	999.0939187425374	0.0018338065260204465	-1.86081984303785	0.52572995522577
J6_190714-T002	J6	14/07/19	4	11	6pm	222	F	c	2025.889343729719	low	7	0.4663155444197855	369.69327645285006	0.5525625444817862	114.97585560606409	890.5781387811109	0.0003188909047383318	-1.8717888127513	0.783198967393482
J6_190714-T002	J6	14/07/19	4	11	6pm	222	F	c	2026.9732122924247	low	7	0.8570123519068602	401.5238122966975	0.946711664247346	12.743160508212155	1050.2240782770557	0.0015904685007043355	-1.82899633793353	0.6594569327005639
J6_190714-T002	J6	14/07/19	4	11	6pm	222	F	c	2028.5670801765973	low	7	0.6553623867523584	375.5058357967402	0.8518162497796408	12.101202280535858	1055.0567817344572	0.0021899067941932183	-1.85059294149739	0.285443438811664
J6_190714-T002	J6	14/07/19	4	11	6pm	222	F	c	2029.6509487393032	low	7	0.5608389655860719	326.13012679822634	0.7333184015667366	13.249371148599096	1226.5724936895165	0.001868191333266676	-1.6077288637426799	0.100920645378337
J6_190714-T002	J6	14/07/19	4	11	6pm	222	F	c	2030.6087860737875	low	7	0.9515357730731466	354.46525405249616	0.4674822090815366	130.36113088493957	927.9249714124713	0.001639333981552909	-1.9943160769159098	0.6896227691266851
J6_190714-T002	J6	14/07/19	4	11	6pm	222	F	c	2032.2312504136328	low	7	1.102773246939023	405.54822284472573	0.9502574240376416	172.5103091620759	1013.6761551789343	0.0051776020801604095	-1.89241960441874	0.47770470941580495
J6_190714-T002	J6	14/07/19	4	11	6pm	222	F	c	2034.3687476841726	low	7	0.6679655095745147	539.3511874022123	0.6265502556078982	55.77665594986866	885.1781585238856	0.0016640301585390859	-2.09151184117189	1.0876051962150401
J6_190714-T002	J6	14/07/19	4	11	6pm	222	F	c	2036.266151645	low	7	0.598648334052541	524.9882887023391	0.6160685439717405	184.28163143116825	904.3983085070116	0.0020714784068194005	-2.05416209606967	1.00124692483828
J6_190714-T002	J6	14/07/19	4	11	6pm	222	F	c	2037.7677217774815	low	7	0.6742670709857066	577.4462548638387	0.483261785552531	69.60352642759847	700.0402414946507	0.0002516045979533699	-2.16941780933503	5.34149364509319
J6_190714-T002	J6	14/07/19	4	11	6pm	222	F	c	2039.574678209079	low	7	0.7687904921517656	379.5175435795951	0.9890725473590564	6.195149602507001	1113.6818122385343	0.0010483442626231419	-1.71719471112074	0.151732716931605
J6_190714-T002	J6	14/07/19	4	11	6pm	222	F	c	2043.6886917990385	low	7	0.5293311585307947	385.22607668123726	0.9665992533367008	13.153826614662762	1155.832713659464	0.002572004276983709	-1.64753927778866	0.0720527564655072
J6_190714-T002	J6	14/07/19	4	11	6pm	222	F	c	2046.030646974484	low	7	0.4474108601866647	384.65929918375804	0.9788681519514256	4.137434329023108	1140.807115934843	0.003585847231077874	-1.6520423931345	0.0505400489456541
J6_190714-T002	J6	14/07/19	4	11	6pm	222	F	c	2046.8951771341708	low	7	0.7687904921517656	420.968180193866	0.7248725384898508	50.97765482561397	1304.9299826761126	0.005226095999415727	-1.5555309395035	0.109660993276379
J6_190714-T002	J6	14/07/19	4	11	6pm	222	F	c	2048.226605108554	low	7	0.7246795622745594	429.8532204685378	0.6097369609299526	34.60134029532185	1226.9400953881252	0.0032204687748068504	-1.6234904529605	0.19729651069874302
J6_190714-T002	J6	14/07/19	4	11	6pm	222	F	c	2051.220584166538	low	7	0.5923467726415765	395.4099099067593	0.8354630893100509	180.4452342176299	1170.4650833521118	0.003944383628809302	-1.66251468492226	0.0764262515079238
J6_190714-T002	J6	14/07/19	4	11	6pm	222	F	c	2052.229467968405	low	7	0.6805686323964437	405.38073153836	0.974230479806016	31.0190642487907	1226.2276612795667	0.006732102344914351	-1.5924032356117799	0.0910350309399609
J6_190714-T002	J6	14/07/19	4	11	6pm	222	F	c	2053.576358711177	low	7	0.8759170361399811	414.4253060389029	0.6836314552632999	51.46276230797571	1158.7009711201445	0.00538830845292625	-1.67243532111267	0.34559953085481204
J6_190714-T002	J6	14/07/19	4	11	6pm	222	F	c	2055.830143732683	low	7	0.5860452112301573	476.64683443901674	0.8579246488505897	94.2257331912173	738.6374039382158	9.479993566510838e-05	-2.13165990608359	1.7690409306982902
J6_190714-T002	J6	14/07/19	4	11	6pm	222	F	c	2062.814913092158	low	7	0.6931717552188275	459.5786083306604	0.8063887700605662	182.4249116336789	1120.9370001395253	0.004690099401055746	-1.8177881337216397	0.540521962571999
J6_190714-T002	J6	14/07/19	4	11	6pm	222	F	c	2066.3239250808388	low	7	0.655362386752131	410.5705468469511	0.7254138756288528	26.878060539932505	1144.5242821002973	0.006952046733356653	-1.72253354834191	0.394889554375166
J6_190714-T002	J6	14/07/19	4	11	6pm	222	F	c	2068.910528316579	low	7	1.3170263349156812	402.65577097047486	0.7414847158648881	48.8285130399122	1116.581717254361	0.003598758332442861	-1.74737786011342	0.363726640613026
J6_190714-T002	J6	14/07/19	4	11	6pm	222	F	c	2071.9045073745638	low	7	0.5923467726415765	401.8803301714882	0.8826140598239547	20.07036078176605	1027.4789594208457	0.00117263045058698	-1.7949642281774398	0.384248387084105
J6_190714-T002	J6	14/07/19	4	11	6pm	222	F	c	2075.308670194547	low	7	0.4915217900643256	383.696627449074	0.9778795590072082	13.257178698745575	1161.3435533436282	0.015644431339945197	-1.6491426514191299	0.180272535510022
J6_190714-T002	J6	14/07/19	4	11	6pm	222	F	c	2076.7548158361806	low	7	0.5075317357336644	419.33260182955	0.9377459276282022	13.771533680598564	1240.4971963232829	0.010558559163660278	-1.61857451514436	0.16130022005159197
J6_190714-T002	J6	14/07/19	4	11	6pm	222	F	c	2077.9297769529653	low	7	0.7971836859255745	395.7371336789034	0.981564651213557	194.37276484876247	1173.1013959954334	0.006503683958884784	-1.65124461256549	0.0559897559142999
J6_190714-T002	J6	14/07/19	4	11	6pm	222	F	c	2080.090063615335	low	7	0.5664874424101072	414.9725486629943	0.957087801611802	196.8074792625193	1149.9133825381164	0.0034147348507795375	-1.7063568940398501	0.199802992978102
J6_190714-T002	J6	14/07/19	4	11	6pm	222	F	c	2086.411097967323	low	7	0.6972153137353416	406.29006085488953	0.9385678973271729	47.2871176587185	990.8902117536072	0.0011611412848023081	-1.8154965429918102	0.51467521487189
J6_190714-T002	J6	14/07/19	4	11	6pm	222	F	c	2087.8060513831188	low	7	0.8817723085476246	512.5241749684684	0.8478020945025383	40.08123032027515	1109.5167889487484	0.0006215418898229713	-1.7916019208883798	0.335512329455531
J6_190714-T002	J6	14/07/19	4	11	6pm	222	F	c	2090.207524846145	low	7	0.7177216464920093	540.6730742862288	0.9094485756472698	181.34612931204293	851.1664344248575	0.0009666442065550517	-2.07343089369632	1.45175108014581
J6_190714-T002	J6	14/07/19	4	11	6pm	222	F	c	2091.569630252737	low	7	0.8663925589803512	387.05396936882585	0.7081713549119363	332.36254383838025	939.8115117153136	0.004488090580683617	-1.9921609622918302	0.817542301335905
J6_190714-T002	J6	14/07/19	4	11	6pm	222	F	c	2095.3730828408534	low	7	0.5998102331400332	431.00809699048204	0.99115381683363	74.58965082805192	1226.2113649879975	0.008227427986699478	-1.63430424531213	0.128625399605156
J6_190714-T002	J6	14/07/19	4	11	6pm	222	F	c	2098.191519284348	low	7	1.1483546343879425	502.6564592947594	0.9334024866277792	80.52646301043939	894.2782062150826	0.003117908278931852	-2.02324016278716	0.876973378784209
J6_190714-T002	J6	14/07/19	4	11	6pm	222	F	c	2102.9368868415027	low	7	0.7331013960601922	417.17640096767644	0.9910613052460582	38.786750854857594	790.7095013969997	0.0018565944847857554	-2.0363971276200403	2.11730734495619
J6_190714-T002	J6	14/07/19	4	11	6pm	222	F	c	2105.4628226456507	low	7	0.6305697322754895	331.61761016494864	0.5285338827717729	230.91529920724167	649.7540559060377	0.00022613324983492526	-2.2575724911982005	7.25080133513013
J6_190714-T002	J6	14/07/19	4	11	6pm	222	F	c	2108.970547137333	low	7	0.4921519861659362	413.80845041439727	0.9214879280050534	48.4307212366873	1191.6304110416488	0.005923299882936138	-1.66042439879293	0.189377441054497
J6_190714-T002	J6	14/07/19	4	11	6pm	222	F	c	2135.9136783554973	high	8	0.6203165658967009	355.20449476001045	0.7125635897875765	91.57737190482328	410.8127787228843	0.000234464462769437	-2.16952693985337	32.9605256711979
J6_190714-T002	J6	14/07/19	4	11	6pm	222	F	c	2137.3743757965026	high	8	0.5613608592207129	352.3773380492273	0.7429462273920101	42.573413621627076	732.6810388534436	0.0007987496179147459	-1.88542013234682	0.464339448546921
J6_190714-T002	J6	14/07/19	4	11	6pm	222	F	c	2141.6539364557275	high	8	0.5921203583561692	347.9572902084843	0.6327273637403773	174.67762744868142	964.0947182662047	0.0037098404431686527	-1.89985934622471	0.368770201093425
J6_190714-T002	J6	14/07/19	4	11	6pm	222	F	c	2144.292633086638	high	8	0.6562026482215515	403.4792429395663	0.7381501034974508	182.8502939448257	1039.4543198748822	0.004142400939291144	-1.75257075205769	0.330094278775882
J6_190714-T002	J6	14/07/19	4	11	6pm	222	F	c	2145.563196171514	high	8	0.4767722365982081	418.57083531729654	0.6005230985135184	103.2495842633976	730.3107017426532	0.0037290780376340146	-2.07080805640808	1.6691260209918601
J6_190714-T002	J6	14/07/19	4	11	6pm	222	F	c	2147.19447119894	high	8	0.492151986166391	406.7361936362431	0.8892786464864362	40.22428923332024	815.979963669783	0.00240572306775897	-1.91476440589324	1.21767380465493
J6_190714-T002	J6	14/07/19	4	11	6pm	222	F	c	2148.5298047425695	high	8	0.6331330238699593	415.83233271369687	0.8693809076496997	41.42292375370289	1011.6776946203578	0.004824036172277991	-1.8030743192790402	0.490993108944734
J6_190714-T002	J6	14/07/19	4	11	6pm	222	F	c	2149.9984294491187	high	8	0.684398855762538	376.2039255883457	0.5767916470972276	59.62524944350714	392.14193603620856	0.00018361852405683588	-2.12512905615055	17.7597967932346
J6_190714-T002	J6	14/07/19	4	11	6pm	222	F	c	2163.581154158121	high	8	0.7894938111412557	378.46378649952607	0.8538705231929002	9.973901155130818	761.6244219260284	0.0024642180537250225	-2.05135165509195	1.3683010429473799
J6_190714-T002	J6	14/07/19	4	11	6pm	222	F	c	2208.2966661547425	high	8	0.7618256842251867	417.4030763181993	0.8790237393128909	32.06607359156442	828.5171710194929	0.009357575958305935	-2.04188365630707	4.2125782849111895
J6_190714-T002	J6	14/07/19	4	11	6pm	222	F	c	2211.7901498438737	high	8	0.5408545264640452	383.2712731520942	0.7161194036278714	22.426180926878203	754.7212207556937	0.0012045252505804376	-1.97136174887656	1.07634262453145
J6_190714-T002	J6	14/07/19	4	11	6pm	222	F	c	2215.1643697852755	high	8	0.9330381404397484	430.41304115411276	0.9395010698503244	12.832883378631381	782.82816931995	0.003225294329404482	-2.0353301279726397	2.38708616626206
J6_190714-T002	J6	14/07/19	4	11	6pm	222	F	c	2219.32528285546	high	8	0.4944778869985385	383.84847139735	0.8265292703558305	136.9667496397828	573.1628437550462	0.0009466924608853672	-2.07395458501318	3.2661766317480896
J6_190714-T002	J6	14/07/19	4	11	6pm	222	F	c	2220.610439931602	high	8	0.9631576810347724	382.95814707669405	0.8972730504393249	28.908559457547305	840.6456369069579	0.004449178215661016	-2.01745553581247	1.3105462609251202
J6_190714-T002	J6	14/07/19	4	11	6pm	222	F	c	2226.7325118414	high	8	0.4160841182069817	335.29465108650516	0.7712337513511395	22.194667411424923	428.1074679025883	8.390979750871603e-05	-1.9290242122993402	2.41612999786193
J6_190714-T002	J6	14/07/19	4	11	6pm	222	F	c	2254.017953634753	high	8	0.652378802621115	366.43613992351095	0.6040272018146153	76.75163047694406	384.3091373063594	0.00012787773747260998	-2.23425972915405	69.924733463937
J6_190714-T002	J6	14/07/19	4	11	6pm	222	F	c	2272.8967362652343	high	8	0.3698525495174181	346.4269826934185	0.6610887197151811	137.26424256900987	389.910051447222	1.6854923949554952e-05	-2.00339988073988	67.6787520832074
J6_190716-T002	J6	16/07/19	5	12	6pm	222	F	c	1772.3929845634284	low	6	0.6241903094912686	293.89163025080376	0.6549872464699142	97.25548905442957	611.3884190401226	7.484584566257959e-06	-2.10574565780842	2.04273058095884
J6_190716-T002	J6	16/07/19	5	12	6pm	222	F	c	1865.9992208195092	silence	7	0.3118849112918269	431.8568596149116	0.992397707834072	8.040972053748476	465.27198116948	1.3428814502233315e-05	-1.7524538732233301	76.5488215739102
J6_190716-T002	J6	16/07/19	5	12	6pm	222	F	c	1866.8606291424771	silence	7	0.3991892228389133	447.6662627427832	0.9992373462293426	9.459075985306525	482.1625521056501	0.00013873533656206526	-2.21039638160602	24.7493262384445
J6_190716-T002	J6	16/07/19	5	12	6pm	222	F	c	1867.86725387278	silence	7	0.4244011737550864	442.65320506488365	0.9967147422435312	13.418202538963328	499.63882152958666	0.00010650195984434157	-2.2202522909266604	24.611811572130105
J6_190716-T002	J6	16/07/19	5	12	6pm	222	F	c	1941.1385615074807	silence	7	0.5672688956130969	472.81192518596833	0.9590853543486952	36.00123454108325	583.6976606701193	7.49541028405638e-05	-2.26658381391568	7.4277190847645596
J6_190716-T002	J6	16/07/19	5	12	6pm	222	F	c	1942.0461917404614	silence	7	0.5714708874324971	531.6808487371991	0.8870465805028553	134.3032706482711	567.5105838410241	0.0001615935744523806	-2.28763465315601	18.0417418574742
J6_190717-T002	J6	17/07/19	6	2	6pm	222	F	c	237.78648931804364	low	1	0.7236960911301082	437.49407083257125	0.9037080071643104	196.86321028931167	517.8777353058694	6.630321425852122e-05	-2.13970307477592	14.996885197030098
J6_190717-T002	J6	17/07/19	6	2	6pm	222	F	c	239.18817437875882	low	1	0.6932246767667323	436.85383208781195	0.9012836727033362	17.665915698583035	501.2896494902041	0.0001798407308407777	-2.1225102089837	24.9351170727253
J6_190717-T002	J6	17/07/19	6	2	6pm	222	F	c	240.50688852771702	low	1	0.7770210662660304	245.71629750664073	0.9662101399826564	126.97904229774916	512.3393720655454	2.6277655391737367e-05	-2.20934109918765	10.5531097986697
J6_190717-T002	J6	17/07/19	6	2	6pm	222	F	c	242.5098022779622	low	1	0.5027783369956467	347.1606683135446	0.8229686141889597	214.8412301531891	491.6493313215432	3.600037306121348e-05	-2.23911921875261	181.139524211063
J6_190717-T002	J6	17/07/19	6	2	6pm	222	F	c	895.1390153136967	silence	3	0.921760284492052	427.86644974208144	0.9647149290011414	20.119619655454127	482.7312707842078	0.00010577073509686741	-2.1273144019371997	46.0751652894857
J6_190717-T002	J6	17/07/19	6	2	6pm	222	F	c	896.8760077992067	silence	3	0.9598495524462578	465.56120730782806	0.9504754454399614	28.934396882039838	704.2051960770941	0.00010634426283623198	-2.08460904643592	2.95501889230334
J6_190717-T002	J6	17/07/19	6	2	6pm	222	F	c	898.2922858895582	silence	3	0.5789568729040866	461.1705444891607	0.9895565509092936	7.435625283812384	849.4735107660566	0.00017711863292598344	-1.9622341621171697	1.77846405616746
J6_190717-T002	J6	17/07/19	6	2	6pm	222	F	c	899.5569714524361	silence	3	0.5789568729040866	492.95537850226026	0.994895731283153	16.705757196337515	539.712727563669	0.0005642602710317765	-2.228103589628	17.0102906807101
J6_190717-T002	J6	17/07/19	6	2	6pm	222	F	c	900.7834458805617	silence	3	0.563721165722427	474.28816951424415	0.9683933954441468	40.22372618728485	506.2907655652609	6.685529046666512e-05	-2.16037319378817	25.0757998503057
J6_190717-T002	J6	17/07/19	6	2	6pm	222	F	c	902.4040597293756	silence	3	0.6170461408582923	471.57663641418884	0.9922371091743342	34.215515316254375	529.7927877822102	2.928156700448285e-05	-2.14836682914163	19.0668654957831
J6_190717-T002	J6	17/07/19	6	2	6pm	222	F	c	903.6575484505414	silence	3	0.5408676049498808	390.136716191623	0.9882305372972836	19.502855704622505	884.9786736678553	1.064607200665617e-06	-1.78981437429425	1.06024465387485
J6_190717-T002	J6	17/07/19	6	2	6pm	222	F	c	1171.9649039585404	low	4	0.4951604834047885	368.5193648191414	0.7105538821914054	88.17903632795894	707.6660917720973	0.0003490187165656664	-2.2081638243251	6.685680183169239
J6_190717-T002	J6	17/07/19	6	2	6pm	222	F	c	1173.061874875622	low	4	0.4418355082689232	644.772455180336	0.7752728885570672	361.80172775583367	692.914232451108	0.0009472087751160803	-2.22149394522992	10.699655258426
J6_190717-T002	J6	17/07/19	6	2	6pm	222	F	c	1174.1055208175674	low	4	0.6018104336767465	386.2893061248052	0.8198881151919932	28.34955543640677	651.9684149852862	0.0008995078043116217	-2.2009475743943905	16.559151892226
J6_190717-T002	J6	17/07/19	6	2	6pm	222	F	c	1175.686760043336	low	4	0.4723069226322423	387.58179702124863	0.6841669811613597	15.451873451432164	1118.767673017265	0.002203238254295659	-1.81692936466723	0.430580960582275
J6_190717-T002	J6	17/07/19	6	2	6pm	222	F	c	1177.9340268526344	low	4	0.4494533618596961	388.5855393677185	0.46350202463615603	58.25562381185824	790.3961946274816	0.0004164411229137778	-2.07942789729053	2.03396182091519
J6_190717-T002	J6	17/07/19	6	2	6pm	222	F	c	1224.8485528894905	low	4	0.7846389198568886	524.9329028169282	0.9168921119918128	36.9130721955928	952.4487637141092	0.0005413765698684532	-1.9868293707698899	0.419327604427544
J6_190717-T002	J6	17/07/19	6	2	6pm	222	F	c	1229.2159984968705	low	4	0.2818605828613272	387.9332397411181	0.6736135652600874	11.945225948751956	546.8156895518413	0.0001427444391929921	-1.97846583132232	5.7937357732069
J6_190717-T002	J6	17/07/19	6	2	6pm	222	F	c	1257.6845542896815	high	5	0.33518555799696514	267.4652676848632	0.7829171338957254	60.3307394949189	398.03761197931334	0.0001861901245668419	-2.3072733577584104	29.4709234294184
J6_190717-T002	J6	17/07/19	6	2	6pm	222	F	c	1258.3701611128574	high	5	0.5180140441773347	411.4441337532315	0.9312651973444392	24.332495166916885	477.5019917967515	0.0005817793912942289	-2.09271944316235	8.10959824800321
J6_190717-T002	J6	17/07/19	6	2	6pm	222	F	c	1259.3391576075812	high	5	0.3351855579971925	412.68493531152484	0.8215920766360985	160.77202124800016	405.89623881226487	-1.5472613612495007e-05	-2.09525369780531	7.17997220428113
J6_190717-T002	J6	17/07/19	6	2	6pm	222	F	c	1263.6552672058615	high	5	0.4494533618596961	257.12871322493936	0.9508959119127248	185.0020934700085	417.9141741230143	0.000129752380666575	-2.2411127638315897	10.394964151927802
J6_190717-T002	J6	17/07/19	6	2	6pm	222	F	c	1267.3763587463134	high	5	0.5180140441773347	366.90538541827203	0.3863919040064182	69.95575428208991	517.7486329443105	0.0002452815145911548	-2.02870627351213	1.71314915782504
J6_190717-T002	J6	17/07/19	6	2	6pm	222	F	c	1268.652119284105	high	5	0.7846389198568886	403.7147870894273	0.8888503945301598	26.258069362604605	890.8385597512206	0.003176358690844076	-1.83402659825968	0.796301535140619
J6_190717-T002	J6	17/07/19	6	2	6pm	222	F	c	1319.12571203657	high	5	0.8989067237196195	393.4541657907656	0.5914488708264576	107.37987159484881	443.217330163817	0.000612139304314198	-2.15901564645515	12.031439790706502
J6_190717-T002	J6	17/07/19	6	2	6pm	222	F	c	1346.427329008094	high	5	0.4723069226322423	343.88641147057785	0.6618193979981593	120.88786394934543	397.6967884179312	-7.933976626394996e-06	-2.16097158249463	5.89798986275275
J6_190717-T002	J6	17/07/19	6	2	6pm	222	F	c	1347.4328856820853	high	5	0.5332497513588805	403.1651521826017	0.7962310574834585	161.8771767681253	419.8136252960288	-2.3527481697647014e-05	-2.1373750770166002	6.050144361401969
J6_190717-T002	J6	17/07/19	6	2	6pm	222	F	c	1387.7513311973673	high	5	0.6246639944490653	310.02373118776575	0.9003473280282478	116.76451879650229	510.08543599081355	0.00018813738996449213	-2.14600929513812	0.680902780275274
J6_190717-T002	J6	17/07/19	6	2	6pm	222	F	c	1389.8526343667481	high	5	0.464689069041242	408.75229928813263	0.8865733666087205	13.378482824927232	448.07415301655806	0.001445403828223019	-2.16912817537181	14.576933469356101
J6_190717-T002	J6	17/07/19	6	2	6pm	222	F	c	1397.8172359576931	high	5	0.7998746270384345	399.4474656836488	0.7216180118688391	101.59223942605864	459.16759588357127	0.000744521029587655	-2.14036056051116	11.3970262849683
J6_190717-T002	J6	17/07/19	6	2	6pm	222	F	c	1402.2115130579173	high	5	0.5865747264949732	393.83108008202026	0.6481094836545829	33.238340520250745	635.8447180225112	0.0004281535095030269	-2.02720751686503	1.23803151821682
J6_190717-T002	J6	17/07/19	6	2	6pm	222	F	c	1407.271296930924	high	5	0.4418355082689232	410.45011474666353	0.7732766005669753	42.76474020591837	451.38990869704423	0.001768516976152638	-2.15494011286592	32.3070131800915
J6_190717-T002	J6	17/07/19	6	2	6pm	222	F	c	1408.5519218119273	high	5	1.0055566739913502	408.0664485268997	0.7005642992244925	192.4381302501828	592.3136254386519	0.001507253066142167	-2.15965411247457	3.6571098988902495
J6_190717-T002	J6	17/07/19	6	2	6pm	222	F	c	1411.5769742318353	high	5	0.5941925800857462	402.41310490521715	0.7871612894570412	18.89652401062034	1079.1492069772225	0.00350687097412995	-1.68996919861106	0.26724417573282
J6_190717-T002	J6	17/07/19	6	2	6pm	222	F	c	1413.187920327624	high	5	0.7160782375392499	407.2194293493257	0.8835196107866302	28.851886169885287	1009.3551175194957	0.004105633339967527	-1.8803037620432401	0.40833727789978297
J6_190717-T002	J6	17/07/19	6	2	6pm	222	F	c	1418.1370763182865	high	5	0.4418355082689232	394.7612252541552	0.8544386364372665	191.3773477573739	427.6205762925495	0.00034604589720690796	-2.28609101263944	16.252092768375302
J6_190717-T002	J6	17/07/19	6	2	6pm	222	F	c	1419.3705259224573	high	5	0.5180140441773347	387.02287419784363	0.6681524484352469	103.64969615027843	630.3381973994863	0.000903538008411463	-2.1864980736617197	3.59477243001837
J6_190717-T002	J6	17/07/19	6	2	6pm	222	F	c	1420.615754112487	high	5	0.6551354088123844	469.8936034178248	0.6101381651265171	230.5786668845905	831.5416129103966	0.0035131021758034687	-2.0914374444121497	0.969054738328484
J6_190717-T002	J6	17/07/19	6	2	6pm	222	F	c	1421.9911894245054	high	5	0.9598495524462578	408.9535287883115	0.848962495153827	20.140618175663406	943.0183536817746	0.00407485333064616	-1.9122195467805099	0.6494438492689829
J6_190717-T002	J6	17/07/19	6	2	6pm	222	F	c	1427.9416804234936	high	5	0.5561033121314267	395.677355150959	0.796073862531967	99.12641003625276	523.993939564323	0.0003917797368718219	-2.1996586475993998	3.73499943105859
J6_190717-T002	J6	17/07/19	6	2	6pm	222	F	c	1431.6614866088553	high	5	0.6018104336767465	397.48247230065004	0.650943028103034	15.524157569510693	1243.9624996678226	0.0199548193829594	-1.5914729042753	0.11499985404933899
J6_190717-T002	J6	17/07/19	6	2	6pm	222	F	c	1433.2460001557504	high	5	0.5256318977683351	366.24188481877337	0.9124165733753314	12.14699140767033	1079.3322840904773	0.0030684097627139	-1.6979280516998703	0.204747524350303
J6_190717-T002	J6	17/07/19	6	2	6pm	222	F	c	1437.8848740486233	high	5	0.3885105331330577	384.26162448198966	0.4284202205923499	29.088556025816327	1120.3894626092695	0.006976710912436883	-1.7073568003608302	0.18483253770065602
J6_190717-T002	J6	17/07/19	6	2	6pm	222	F	c	1439.5289841357555	high	5	0.7617853590843424	395.8740733589619	0.5617075725062693	34.89864621651168	1260.398154761577	0.014161522052654668	-1.5047716197149898	0.0651280389113794
J6_190717-T002	J6	17/07/19	6	2	6pm	222	F	c	1440.9120373013648	high	5	0.5865747264949732	383.5872560399779	0.5639245964349836	24.58009349768184	721.2645436197901	0.000741028466099589	-1.9141903959958602	0.958132318330386
J6_190717-T002	J6	17/07/19	6	2	6pm	222	F	c	1443.2930902207736	high	5	0.5408676049498808	385.8223120672014	0.6882892467066253	11.60441215049633	1162.518355594543	0.009444111145998293	-1.61445210036208	0.0743464573775327
J6_190717-T002	J6	17/07/19	6	2	6pm	222	F	c	1444.5175756828642	high	5	0.8608174557653001	409.7176084249073	0.9621458251862844	25.701803107725876	1229.9045986810095	0.012973863831369406	-1.58423983193339	0.12355697008112101
J6_190717-T002	J6	17/07/19	6	2	6pm	222	F	c	1455.4954511078574	high	5	0.6475175552216115	378.0784060847375	0.5729529263505408	78.21980155029519	435.4367971368343	0.000290863401794913	-2.17012444483357	17.313698472107998
J6_190717-T002	J6	17/07/19	6	2	6pm	222	F	c	1479.5877799514035	high	5	0.5713390193132	343.10973877765775	0.8404352070463548	125.11687929331569	397.90795657880113	0.00040948436603577894	-2.25570649178459	15.6665787658987
J6_190717-T002	J6	17/07/19	6	2	6pm	222	F	c	1480.5552473574407	high	5	0.6475175552216115	388.3191301950612	0.7083106363792417	90.23066812196116	647.8119847171957	0.0012326496897193747	-1.9561592627306899	1.5596149147568
J6_190717-T002	J6	17/07/19	6	2	6pm	222	F	c	1492.268719326222	high	5	0.5865747264949732	417.58145665456186	0.916588723231294	19.234601022311665	1351.2695089979989	0.024716714960008712	-1.4376353622056601	0.0372406660084544
J6_190717-T002	J6	17/07/19	6	2	6pm	222	F	c	1496.0661112693808	high	5	0.41898194749637696	315.6386157803912	0.6056617155377549	64.03988931373021	424.45463344979856	0.00022047390969878592	-2.24141129768311	12.644096348922501
J6_190717-T002	J6	17/07/19	6	2	6pm	222	F	c	1500.7395563754858	high	5	0.7770210662661157	303.43274205552075	0.5707037805975517	134.99263483712065	602.0882956131742	0.0009342082006331469	-2.17519248111456	2.57253769178508
J6_190717-T002	J6	17/07/19	6	2	6pm	222	F	c	1505.7232226459823	high	5	0.41898194749637696	274.50634126244097	0.6420036847199694	192.094816488103	400.4565716386065	0.00010918570629962104	-2.24350855520412	40.06730448272079
J6_190717-T002	J6	17/07/19	6	2	6pm	222	F	c	1507.3196366455338	high	5	0.5789568729042003	378.11869084512267	0.980095959087184	12.775869616189992	956.4019986323747	0.002745922457664663	-1.79733856828056	0.33840043605622805
J6_190717-T002	J6	17/07/19	6	2	6pm	222	F	c	1510.2249142408216	high	5	0.4494533618596961	361.3259511893405	0.4490719425747247	20.57270678630164	623.0602492535527	0.000731901572198201	-1.99137693460419	1.00780378654246
J6_190717-T002	J6	17/07/19	6	2	6pm	222	F	c	1516.8000692342596	high	5	0.6094282872675194	361.70372099616407	0.6390288082885549	127.83746628366464	461.35643383897303	0.000331975988620133	-2.10711205996148	6.17406891022323
J6_190717-T002	J6	17/07/19	6	2	6pm	222	F	c	1542.4002122780432	silence	6	0.8989067237193922	458.65463559459226	0.4004451825349285	151.63046142392142	688.4181098597712	0.00037662737930562823	-2.1180237389426	3.21616298529685
J6_190717-T002	J6	17/07/19	6	2	6pm	222	F	c	1559.500332213293	silence	6	0.41898194749637696	295.1257401049118	0.5103148307658005	36.228173586694204	640.0728530106368	8.813684856986742e-05	-2.22587778812292	6.974285360907661
J6_190717-T002	J6	17/07/19	6	2	6pm	222	F	d	1562.5330024867915	silence	6	0.563721165722427
J6_190717-T002	J6	17/07/19	6	2	6pm	222	F	c	1563.5420772155044	silence	6	0.6551354088126118	400.71971356603444	0.9578075054224748	12.977961393318935	1118.2063863256694	0.0060033598416237436	-1.77424447017959	0.37360958554566204
J6_190717-T002	J6	17/07/19	6	2	6pm	222	F	c	1565.1349122269364	silence	6	0.4875426298140155	457.2136481848045	0.6432027100339092	52.04016928765356	813.9515503687994	5.5250150788767e-05	-1.62991786535508	2.2303279679193198
J6_190717-T002	J6	17/07/19	6	2	6pm	222	F	c	1611.0072129590326	silence	6	0.4045145838317694	374.53904739026086	0.9616247294016214	15.85664608437196	438.35111822911637	0.00019984523834031838	-2.1198979600845598	30.7915165053597
J6_190717-T002	J6	17/07/19	6	2	6pm	222	F	c	1612.11962806457	silence	6	1.1124151055371383	390.39015169962687	0.6605800983445511	125.99674721546181	1029.064617038662	0.0007231481114635086	-1.73357904405593	0.671569873969699
J6_190717-T002	J6	17/07/19	6	2	6pm	222	F	c	1616.7635642901382	silence	6	0.4688691767139517	438.79846425781085	0.5278926983942196	140.00087015806844	877.3226661328896	0.0004907470560315373	-1.8627750946317398	1.11336130892301
J6_190717-T002	J6	17/07/19	6	2	6pm	222	F	c	1617.7104961568352	silence	6	0.8549967340079547	416.07039573754344	0.6930027231755985	34.37608424373167	1166.9244211884745	0.0033577708855176925	-1.6617947783818001	0.425363073212557
J6_190717-T002	J6	17/07/19	6	2	6pm	222	F	c	1636.091773930572	silence	6	0.5926840328634171	381.806180779022	0.9877608603045696	167.02593037809802	1104.5054192904468	0.003080205529072519	-1.7680996360048402	0.15965751716839702
J6_190717-T002	J6	17/07/19	6	2	6pm	222	F	c	1637.3001142456342	silence	6	0.5421450843246021	398.4094803947965	0.8767299158640869	21.801573634193574	992.6549476020348	0.0018464797147177974	-1.74638800574974	0.9589803153326211
J6_190717-T002	J6	17/07/19	6	2	6pm	222	F	c	1641.6538375354305	silence	6	1.084290168649204	410.540569637953	0.5402886128416459	216.6046693322474	748.5660507116612	0.0018514849686905176	-2.13299918122424	3.16306319466909
J6_190717-T002	J6	17/07/19	6	2	6pm	223	F	c	1648.527905975567	silence	6	0.5237672848559214	512.9414985010341	0.6680306241159674	232.12728242717304	723.7517947245924	0.00012197070906659941	-2.05450529886687	3.98917114729019
J6_190717-T002	J6	17/07/19	6	2	6pm	222	F	c	1649.7087181199179	silence	6	0.7259230790109541	481.82754062731163	0.8766250732089972	29.048243097584304	846.2948260235472	0.00018001299660559269	-2.06934452095723	1.2925492081652
J6_190717-T002	J6	17/07/19	6	2	6pm	222	F	c	1676.3345559718562	silence	6	0.6799785803393661	528.587463222314	0.32968783816213776	34.826480108619194	618.0213501220111	0.00012168263109392223	-2.2153654891231405	8.09000282346485
J6_190717-T002	J6	17/07/19	6	2	6pm	222	F	c	1681.8394012945944	silence	6	0.3675559893724767	515.365822689579	0.7739947933719592	20.70633928050484	672.1721692400416	9.718097920031938e-05	-2.18771518017673	2.5720252345279397
J6_190717-T002	J6	17/07/19	6	2	6pm	222	F	c	1682.7123467693546	silence	6	0.5329561845903754	403.57200520816184	0.7407236311012224	13.492204773964884	869.3481441624498	0.002041716265294824	-1.8246958877583501	1.14260492370852
J6_190717-T002	J6	17/07/19	6	2	6pm	222	F	c	1683.7223149037386	silence	6	0.42268938777829135	503.2220649717222	0.8733308674410469	311.47232559964465	966.4611536193152	1.2089598118730153e-05	-1.6689066281228	2.3583518050626298
J6_190717-T002	J6	17/07/19	6	2	6pm	222	F	c	1704.3725886627772	silence	6	0.7075452795422734	493.39180998877714	0.880804522750876	45.92139838562355	787.4096785256721	5.2656648874681314e-05	-2.0610197786765503	1.35403947132851
J6_190717-T002	J6	17/07/19	6	2	6pm	222	F	c	1713.650982544728	silence	6	0.6891674800735927	398.63897537907445	0.783111707569663	42.923559938164495	520.1830284329659	0.0002603810709426011	-2.12093370147509	9.418580470970019
J6_190717-T002	J6	17/07/19	6	2	6pm	222	F	c	1714.9787785563365	silence	6	0.5926840328631897	625.7676424978207	0.7096683485134455	84.84570142850373	726.0694830688342	8.415573170656645e-05	-2.17222025436518	5.6977237933011695
J6_190717-T002	J6	17/07/19	6	2	6pm	222	F	c	1726.7780193280523	silence	6	0.454850536848653	546.7451121764468	0.9637987626195146	20.72860522678775	1101.1853015316522	0.0055633176428165005	-1.70552024791974	0.0211708836207432
J6_190717-T002	J6	17/07/19	6	2	6pm	222	F	c	1727.6509648028125	silence	6	0.5053894853872407	509.2117677598843	0.8836060411870607	5.277295176774602	1072.0922903931526	0.00024230168152839578	-1.7613861835818898	0.310048619181297
J6_190717-T002	J6	17/07/19	6	2	6pm	222	F	c	1728.6413966758814	silence	6	0.4962005856530141	534.0252021261948	0.9468288059517624	18.04161533561444	1095.8163707309332	0.00040854672201849575	-1.77497580881662	0.140878545547926
J6_190717-T002	J6	17/07/19	6	2	6pm	222	F	c	1729.8025955019332	silence	6	0.5467395341918291	501.4180685722832	0.9283867347035394	15.345986551929002	1002.3414163523931	0.002116759157181869	-1.8760620296576003	0.380407730615267
J6_190717-T002	J6	17/07/19	6	2	6pm	222	F	c	1731.118306893704	silence	6	0.8361898758225834	563.3672271333129	0.7076109206951867	88.75676436421922	1161.7356412301476	0.000824505111259137	-1.7293526223696598	0.24106074295456398
J6_190717-T002	J6	17/07/19	6	2	6pm	222	F	c	1961.3223043924015	high	7	1.1440180169222458	313.53163647666236	0.6475376981988613	118.47349326371322	437.46078160052286	0.00011505616258218208	-2.01416594813496	3.17771748715988
J6_190717-T002	J6	17/07/19	6	2	6pm	222	F	c	1966.6797026369504	high	7	1.0245623203761625	317.6200064832638	0.6938162781905188	147.65916834400159	381.4619114521254	2.7753535781839945e-05	-2.38656754477243	67.2107954012677
J6_190717-T002	J6	17/07/19	6	2	6pm	222	F	c	1970.0297124435008	high	7	0.6937619299405924	343.1322064096752	0.5654889650280255	159.29541034425026	382.51040827385833	8.081176819355604e-05	-2.2663462339809	88.3184230809095
J6_190717-T002	J6	17/07/19	6	2	6pm	222	F	c	1971.9853649426216	high	7	0.5145783851214674	330.3282731680551	0.5447887745174632	96.01807476844887	425.1782775197409	-3.0305077908529348e-06	-2.09912126363697	0.318848146632258
J6_190717-T002	J6	17/07/19	6	2	6pm	222	F	c	1973.4109569772552	high	7	1.07510126891475	353.35414157613707	0.8170603224754454	108.12624942225756	776.0225617571421	0.0011465836167153089	-1.887898251424	0.293019743082155
J6_190717-T002	J6	17/07/19	6	2	6pm	222	F	c	1974.8862385955454	high	7	0.620250732066097	290.75382800672924	0.834372632977071	131.3832855061798	402.20990987880447	3.639270170303498e-05	-1.8063930703824898	7.94067550529393
J6_190717-T002	J6	17/07/19	6	2	6pm	222	F	c	1976.2834916230775	high	7	0.8637565750254907	342.394210282072	0.4791358666026681	210.16524393404663	482.2506774607338	0.000253029254568583	-2.14749155828602	2.9602350028179596
J6_190717-T002	J6	17/07/19	6	2	6pm	222	F	c	1979.471807790904	high	7	0.5651173336605098	296.68105806831124	0.6632742939525451	86.47142204030999	466.5310348176769	0.00015637549112149692	-1.9599185891016102	0.628785139190719
J6_190717-T002	J6	17/07/19	6	2	6pm	222	F	c	1981.7072970494805	high	7	0.8867288243613984	401.2719881635013	0.4982610709055	162.81388151165055	575.3085033233709	0.0007182641834494979	-2.09872235381515	2.59016178660257
J6_190717-T002	J6	17/07/19	6	2	6pm	222	F	c	1983.1875978000796	high	7	0.7075452795422734	296.3316781999776	0.8815362922899922	104.78580441111893	747.795061808947	0.001041028610349164	-1.94199469325268	0.277786357035779
J6_190717-T002	J6	17/07/19	6	2	6pm	222	F	c	1986.8813419817843	high	7	0.6248451819333241	356.927604333807	0.6984802666246704	178.0862559223597	930.4872012116246	0.0017293285572388016	-1.8326461964967098	0.16131719551715698
J6_190717-T002	J6	17/07/19	6	2	6pm	222	F	c	1988.449112158981	high	7	0.5250919200473163	297.1960996472611	0.4467660628740011	122.3022408748923	429.7004100546106	0.00016177469888619496	-1.85280639710846	3.15839517129512
J6_190717-T002	J6	17/07/19	6	2	6pm	222	F	c	1990.078889760606	high	7	0.9918402934226832	373.985971353742	0.7067693895137576	114.32963602884577	592.7388948263023	0.0002966326260871049	-1.87585192430525	0.8800698154035641
J6_190717-T002	J6	17/07/19	6	2	6pm	222	F	c	2143.9515509068233	low	8	0.4035428644806416	494.6226392872117	0.9458895692991875	21.953432244856742	753.9258158102896	0.00012035666053634758	-2.05352635885375	1.80798649251046
J6_190717-T002	J6	17/07/19	6	2	6pm	222	F	c	2361.8005772127553	low	8	0.7390182578442364	416.10637198164466	0.9110686750663284	45.480643690331924	469.7611608055085	0.00010466702911888849	-2.14782404990421	55.7711060890248
J6_190717-T002	J6	17/07/19	6	2	6pm	222	F	d	2364.323935606316	low	8	0.4716103355976884
J6_190717-T002	J6	17/07/19	6	2	6pm	222	F	c	2367.782341387623	low	8	0.870291237856236	392.52726106334563	0.9781305091885638	20.247284729032916	422.69299249208143	0.0007965796707975658	-2.05329598955249	36.30257049595
J6_190717-T002	J6	17/07/19	6	2	6pm	222	F	c	2374.9793898213143	low	8	0.6369170511684388	395.89078506669694	0.5207830810749802	217.9032352586235	523.2352461724319	0.00012127273060375496	-2.15354471785961	9.132390040433641
J6_190717-T002	J6	17/07/19	6	2	6pm	222	F	d	2379.024255071945	low	8	0.6466409756135363
J6_190717-T002	J6	17/07/19	6	2	6pm	222	F	c	2385.813635359736	low	8	0.5299538822696377	487.1908857613303	0.4930082084417272	166.99038327033423	784.1340116855799	2.941207402893483e-05	-1.8934981641757802	0.793006223309852
J6_190717-T002	J6	17/07/19	6	2	6pm	222	F	c	2418.3944469467983	low	8	0.3306134311405913	291.4114478441407	0.6485176452289175	81.84063028934588	443.62792623182486	3.24329688773502e-06	-2.1416151551832803	3.820880361099
J6_190718-T002	J6	18/07/19	7	1	6pm	222	F	c	2118.852718851732	low	7	1.178714672258593	400.7428029290274	0.8411425704859056	90.00971715566341	435.2806370624346	0.0003334274174737224	-2.1186124934021398	44.29752368154
J6_190718-T002	J6	18/07/19	7	1	6pm	222	F	c	2121.50593983101	low	7	0.7845409021151681	469.0044871663367	0.9495542548079592	14.180303734531376	494.8894924611157	0.00011992455152432733	-2.18390352031594	24.2200316626835
J7_190711-T001	J7	11/07/19	1	3	2pm	215	M	c	36.85275153546459	silence	1	0.5821427511919524	491.1452578801989	0.7183595226735775	353.83741485746435	671.6762134478872	9.344216599198241e-05	-2.16259241241604	9.70029726356302
J7_190711-T001	J7	11/07/19	1	3	2pm	215	M	c	38.35395567972511	silence	1	0.4463833926051777	245.43329296664817	0.7949585618545082	34.469814089037534	675.3549332310711	5.351031022669272e-05	-2.15466668696519	9.78094702606518
J7_190711-T001	J7	11/07/19	1	3	2pm	215	M	c	42.46241166739404	silence	1	0.3229691572245201	686.0210968965822	0.8431913547981487	50.53624174780373	678.7036991768846	1.6443153332136608e-05	-2.22346875726739	34.6906815776702
J7_190711-T001	J7	11/07/19	1	3	2pm	215	M	c	43.88798424635208	silence	1	1.3332946882138117	428.90618950668016	0.5622819592937659	263.0792846589643	612.4847172972615	0.000292759434406066	-2.19661760002874	17.796684754737
J7_190711-T001	J7	11/07/19	1	3	2pm	215	M	c	46.701920010508786	silence	1	1.0046657157667482	470.22760008338287	0.6119622448584928	78.75641552717595	592.5720791516154	0.0003654090339093363	-2.18845445894627	8.96137583599814
J7_190711-T001	J7	11/07/19	1	3	2pm	215	M	c	51.465622711555795	silence	1	0.8074883322985045	280.2048795577216	0.7068000533475605	292.2620181254236	616.749361065999	0.0001674557521367634	-2.21339287988143	13.0279389323527
J7_190711-T001	J7	11/07/19	1	3	2pm	215	M	c	54.04808439529601	silence	1	0.7887095338729608	489.61564473846863	0.7223733895933321	302.95578005922	629.0816426948841	0.00014404362747644122	-2.19182446097857	9.79729219427429
J7_190711-T001	J7	11/07/19	1	3	2pm	215	M	c	78.34907866024477	silence	1	1.079780909468937	507.3090560624802	0.99218621955826	300.06228448316523	579.1498107976498	0.00015130508026864697	-2.24025779959637	13.4988750717414
J7_190711-T001	J7	11/07/19	1	3	2pm	215	M	c	80.32085249492717	silence	1	0.9107717236390158	380.8204011451848	0.7108424491100344	205.21022931949867	557.7553710302295	0.00017743881893649542	-2.0798315278463	12.5759803495985
J7_190711-T001	J7	11/07/19	1	3	2pm	215	M	c	82.02033375243913	silence	1	0.7323731385963299	389.8114908815122	0.5402760665088069	256.19197689878416	605.4495236588599	0.0001207162505660805	-2.11428815011171	9.303234690287882
J7_190711-T001	J7	11/07/19	1	3	2pm	215	M	c	87.70637697636253	silence	1	0.5164169567025283	478.01676625186775	0.6330881366227132	290.57303176361586	607.9166924978175	3.750376704548762e-05	-2.24656253972281	20.193022945177802
J7_190711-T001	J7	11/07/19	1	3	2pm	215	M	c	110.89940573393572	silence	1	0.9201611228517804	498.5479685415012	0.9990481434430032	300.7069171097376	580.6734537681784	0.0001553140184706667	-2.2949843816799502	22.5057728440802
J7_190711-T001	J7	11/07/19	1	3	2pm	215	M	c	112.85240077019256	silence	1	1.3708522850649132	476.22902847423256	0.7000403143454553	90.16681932175959	612.7631640231491	0.0004631993410818163	-2.08220771535959	14.2531843060535
J7_190711-T001	J7	11/07/19	1	3	2pm	215	M	c	115.443874952918	silence	1	1.1079491071072596	410.1230483779385	0.6286042406292449	223.40690835327416	595.1211217312377	0.00022690470332758516	-2.10181338186846	8.70803068513141
J7_190711-T001	J7	11/07/19	1	3	2pm	215	M	c	117.92415114546404	silence	1	1.0328339134050708	305.6320366543191	0.9345618159316784	198.95459129222988	782.962442850972	0.00028509526027525536	-2.1198335852748897	7.6003895495366205
J7_190711-T001	J7	11/07/19	1	3	2pm	215	M	c	122.01722460258249	silence	1	0.891992925213458	273.52112832186464	0.7710120702916297	454.7818277477337	610.3363127828076	0.00016454192248071514	-2.19155216983464	9.107146907512119
J7_190711-T001	J7	11/07/19	1	3	2pm	215	M	c	123.75426345694557	silence	1	0.9671081189156469	501.3266016788176	0.7995419580796862	212.66627162568773	701.8462628257829	0.00026242807704871765	-2.1703258456075303	18.170547228529
J7_190711-T001	J7	11/07/19	1	3	2pm	215	M	c	137.37510281611722	silence	1	0.8074883322984759	477.1205977731019	0.7915267656863895	93.84313631889437	611.5566019330835	0.0001708096166674483	-2.1975684074335	14.6467060220594
J7_190711-T001	J7	11/07/19	1	3	2pm	215	M	c	140.8358420263452	silence	1	0.6948155417452142	386.5741978822734	0.5977509838280112	121.42101052918888	651.4679593249317	0.00013944138405077306	-2.09148001285483	9.78626866624143
J7_190711-T001	J7	11/07/19	1	3	2pm	215	M	c	144.3309138111454	silence	1	1.5544992393733708	477.5720156410492	0.9223975025375644	227.9889883434539	654.7579741687343	0.0004086786982183588	-2.2323909695866804	8.84610769126084
J7_190711-T001	J7	11/07/19	1	3	2pm	215	M	c	147.32930628865938	silence	1	0.6132069863859897	599.0594853972487	0.8267786746580396	62.000139450730565	621.3044478234845	0.0002464012069478483	-2.25823168066661	190.050032334001
J7_190711-T001	J7	11/07/19	1	3	2pm	215	M	c	148.55333188694505	silence	1	1.0208127071255717	407.12085075718767	0.9698676297638554	13.833576986951302	781.8653911793699	0.0005784508588734539	-2.1171593692853303	50.669093505592
J7_190711-T001	J7	11/07/19	1	3	2pm	215	M	c	150.45214077375317	silence	1	0.8359706772782545	289.1792694756987	0.7699936477789419	236.57773371906268	738.531709170205	0.0003742702920247497	-2.1757350857007	3.79585651061468
J7_190711-T001	J7	11/07/19	1	3	2pm	215	M	c	151.98091882460722	silence	1	1.044231480787289	496.87963960889147	0.5642417248288631	59.49246747595083	687.4256862227368	0.0007092885910659556	-2.21883973778777	3.3050131242395
J7_190711-T001	J7	11/07/19	1	3	2pm	215	M	c	153.8566148742282	silence	1	1.8726824044449868	408.91174593515166	0.3144959589083713	186.5257481739843	640.4104995964726	0.0005056488932864004	-2.2036978936576097	6.95232590800449
J7_190711-T001	J7	11/07/19	1	3	2pm	215	M	c	158.59735882977253	silence	1	1.6109309283773428	510.03101860268384	0.7553500103448064	83.91054099896381	972.7995606177956	0.0015177698954829367	-2.0022917645841103	0.69826106703988
J7_190711-T001	J7	11/07/19	1	3	2pm	215	M	c	161.33878330905668	silence	1	0.9764975181284116	431.6275682889951	0.7133485309062009	256.9325918536619	641.8835619756939	0.0005293393183584274	-2.2177865139171002	7.397652011856019
J7_190711-T001	J7	11/07/19	1	3	2pm	215	M	c	163.52388683344697	silence	1	0.9791240103143366	419.1019314701297	0.9864843621453748	176.24979643203852	796.3851202239608	0.00028225355455365874	-2.10416979508339	6.87578558437073
J7_190711-T001	J7	11/07/19	1	3	2pm	215	M	c	165.3244233984562	silence	1	1.147870580807847	476.6558450452012	0.6825916075456043	115.90390389703043	627.0027660824791	0.00021547087588131078	-2.15916348114384	7.115917569761901
J7_190711-T001	J7	11/07/19	1	3	2pm	215	M	c	169.40556263792078	silence	1	0.7192076351120704	436.4291073393769	0.6768518455541171	385.6783090734974	590.5726245765811	0.0003258670863169573	-2.2054049180425497	17.3551431451549
J7_190711-T001	J7	11/07/19	1	3	2pm	215	M	c	172.20552293557168	silence	1	0.9358007850135834	520.2048804652209	0.556984180479179	80.429353371064	620.4696553993803	0.0005783635719317085	-2.25220801747086	10.3986351656187
J7_190711-T001	J7	11/07/19	1	3	2pm	215	M	c	173.85602832853138	silence	1	1.088060040906413	436.66857553343203	0.6856158969664672	244.80499361694714	689.645654147757	0.00021987002575308624	-2.08291601480806	5.81460964369338
J7_190711-T001	J7	11/07/19	1	3	2pm	215	M	c	177.36391711589428	silence	1	1.0322420644774866	459.300082877763	0.6499076317272151	197.02352962106002	881.3531266814616	0.0008845259099795881	-2.0985248383841	1.2622409673731498
J7_190711-T001	J7	11/07/19	1	3	2pm	215	M	c	178.97468115166177	silence	1	0.99889709645592	499.5907414294737	0.5677279826078487	119.89661273108344	947.461866611065	0.0007588853060370241	-2.02255380908053	0.826888216270288
J7_190711-T001	J7	11/07/19	1	3	2pm	215	M	c	181.52854714501342	silence	1	0.9596039925985737	290.7376721005788	0.6843697829273716	263.62037415969746	949.6628199789573	0.0009385035864367833	-1.98803843674707	0.934147386426119
J7_190711-T001	J7	11/07/19	1	3	2pm	215	M	c	183.28603552436292	silence	1	0.7264784537105129	396.9273890514801	0.8916759235028991	170.60142221002118	1071.8292730312842	0.0018857349848852758	-1.88152510337144	0.5336337639480171
J7_190711-T001	J7	11/07/19	1	3	2pm	215	M	c	186.25401511090888	silence	1	1.3625832972105345	498.27291961812654	0.5758693287842279	90.40111371816279	1017.4526914968767	0.0018187953474172573	-1.9160838614206799	0.525717544876106
J7_190711-T001	J7	11/07/19	1	3	2pm	215	M	c	189.138424603188	silence	1	0.9006388018269433	430.12113394901513	0.6696681598433533	22.886795066174216	946.7776879451781	0.0005151929491788324	-1.95039392087365	1.14816850589678
J7_190711-T001	J7	11/07/19	1	3	2pm	215	M	c	191.39052439624112	silence	1	1.1143624024071528	324.8103849329005	0.5373309135657743	312.69637698706435	1079.5017218459288	0.0013226755743869101	-1.85562408910443	0.388606875742419
J7_190711-T001	J7	11/07/19	1	3	2pm	215	M	c	195.2951771470531	silence	1	0.7702651968959344	315.9869925004923	0.9938724193385544	13.715232635363975	844.4538143905185	6.766180690849895e-05	-2.0619660065281598	1.4762881138382802
J7_190711-T001	J7	11/07/19	1	3	2pm	215	M	c	197.0353129194817	silence	1	0.8544353283623707	429.0514041091122	0.4893054032549392	77.30904328782054	669.5153697246913	0.0002592533707914574	-2.18917172150955	5.23261658590912
J7_190711-T001	J7	11/07/19	1	3	2pm	215	M	c	226.17907417846507	silence	1	0.7229837393835509	534.3372437396054	0.6025638938147418	224.86631962583627	529.1840702658885	0.00021440689906864413	-2.25129025470479	41.361137786251604
[truncated: 1,535 more rows]
